# Supplementary material for: FGFR1 Emerges as a Potential Therapeutic Target for Lobular Breast Carcinomas
Source: Oxford University Press journal article supplement (doi:10.1158/1078-0432.ccr-06-1164), 2006-11-15
Supplement: 10780432ccr061164-sup-supplementary_tables_1-4.xls [file 10780432ccr061164-sup-supplementary_tables_1-4.xls]

## Sheet: Supplementary Table 1
Recurrent gains				Recurrent losses
Chrom	Start	End	Cytoband	Chrom	Start	End	Cytoband
	(kb)	(kb)			(kb)	(kb)
1	1036	33047	1p36.33-p35.1	2	79065	81845	2p12
1	142391	245204	1q21.1-q44	4	8588	15410	4p16.1-p15.33
2	201705	210373	2q33.1-q34	4	18903	21065	4p15.31
2	216012	221540	2q35	4	31765	37344	4p15.1-p14
2	232063	234356	2q37.1	8	345	17473	8p23.3-p22
3	185039	187368	3q27.1-q27.3	9	40359	68468	9p12-q21.11
4	248	11277	4p16.3-p15.33	10	52151	59929	10q21.1-q21.2
4	39260	41111	4p14	10	84084	85967	10q23.1
5	368	1869	5p15.33	11	78305	133754	11q14.1-q25
5	136960	143822	5q31.2-q32	13	23753	24434	13q12.13-q12.13
5	148549	153647	5q33.1-q33.2	13	50862	112315	13q14.3-q34
5	167482	180504	5q34-q35.3	13	83953	112315	13q31.1-q34
6	31850	46265	6p21.33-p12.3	15	22911	23337	15q12
7	71804	77318	7q11.23-q21.11	15	29554	38062	15q13.3
7	97535	102756	7q22.1	15	41610	48250	15q15.3-q21.2
7	137651	158047	7q34-q36.3	15	52066	55795	15q21.3
8	34631	42348	8p12-p11.21	15	70607	74238	15q24.1-q24.2
9	107593	109201	9q31.3	15	78478	80210	15q25.1-q25.2
9	120600	137872	9q33.2-q34.3	16	33556	88467	16p11.2-q24.3
11	400	12022	11p15.5-p15.3	18	5196	9470	18p11.31-p11.22
11	56713	78305	11q12.1-q14.1	18	13628	15314	18p11.21
12	6121	15916	12p13.1-p12.3	18	20425	42966	18q11.2-q21.1
12	47613	64794	12q13.12-q14.3	18	59286	72826	18q21.33-q23
12	102747	18328	12q23.3-q24.33	22	20622	36037	22q11.22-q13.1
13	112315	113937	13q34	X	78461	2829	Xq21.1-q28
14	19884	25192	14q11.2-q12
14	61171	69759	14q23.2-q24.2
14	72485	75187	14q24.3
14	100371	104789	14q32.31-q32.33
15	20524	21439	15q11.2
15	37664	41610	15q14-q15.3
15	50631	52066	15q21.3
15	58747	66395	15q22.2-q22.31
15	74238	75551	15q24.3
15	86840	94508	15q26.1-q26.2
16	915	45748	16p
17	68271	74465	17q24.3-q25.3
18	11850	13628	18p11.21
18	44641	54428	18q21.1-q21.31
19	93	63771	19p13.3-p13.43
20	151	6720	20p13-p12.3
20	24843	62430	20p11.21-q13.33
21	31850	37670	21q22.11-q22.13
Chrom: chromosome; Cytoband: cytogenetic band

## Sheet: Supplementary Table 2
Case	Gains	Losses
LC18	4q, 8q, 11q, 15q, 19	6p, 11q, 14q, 16q
LC22	1q, 6q, 8q, 19q, 20q	3p, 10q, 11q, 13q, 15q, 16q, 18p
LC32	1q, 8q, 12q	16q, 18p
LC33	1q, 6q, 9q, 19p	5q, 16q, 17p, 18p
LC38	1q, 9q, 19p, Xq	13q, 16q, 17q, 18q
LC40	1q, 3q, 8p, 8q	1p, 2p, 2q, 6p,6q, 9p, 16q
LC50	1q, 8p	11p, 16q
LC51	8p, 8q	11q, 13q, 16q, 17q
LC57	1q, 5p, 5q, 7p, 7q, 8q, 9p, 11p, 11q, 12q, 20p	2q, 10q, 16q, 17p, 17q, 18p,Xp
LC58	1q	16q, 17q
LC62	1q, 3p, 11p	16q
LC71	1q, 20p, Xp	7q, 11p, 13q
LC73	1q	4p, 8p, 12q, 16q

## Sheet: Supplementary Table 3
	Clone	Chrom	kb	end	Type	Cytoband	MDA-MB-134	ZR-75-1
1	RP11-111O5	1	4366.57	4548.97	BLAT	p36.32	-0.292	-0.445
2	RP11-49J3	1	5877.82	5978.12	TILE_C	p36.31	-0.094	-0.29
3	RP11-426J21	1	6062.01	6262.68	BEP	p36.31	-0.028	-0.303
4	RP11-51B04	1	6293.7	6294.06	STS_OUR	p36.31	-0.115	-0.091
5	RP11-402E10	1	6896.26	6896.6	STS_OUR	p36.31	0.136	0.241
6	RP11-60J11	1	7041.73	7232.44	BLAT	p36.23	-0.031	-0.411
7	RP11-338N10	1	7653.23	7855.19	INHOUSE_SEQ	p36.23	-0.122	-0.149
8	RP11-199O1	1	10405.5	10572.8	BLAT	p36.22	-0.113	-0.361
9	RP11-178M15	1	13714.4	13848.8	BLAT	p36.21	0.041	0.271
10	RP11-285P3	1	14486.4	14563.6	TILE_C	p36.21	-0.006	-0.249
11	RP11-219F4	1	14643	14829.7	BLAT	p36.21	-0.297	-0.46
12	RP11-265F14	1	15503.4	15607.7	TILE_C	p36.13	-0.006	-0.208
13	RP11-349O14	1	16342.4	16532.9	BEP	p36.13	0.039	-0.25
14	RP11-430L17	1	16386.5	16511.4	TILE_C	p36.13	0.176	-0.227
15	RP11-412G13	1	16470.4	16471.3	STS_OUR	p36.13	0.219	-0.318
16	RP11-174G17	1	18127.8	18243.1	TILE_C	p36.13	-0.057	-0.329
17	RP11-224F8	1	20097.1	20282.8	BLAT	p36.12	0.177	-0.348
18	RP11-155L18	1	20381.6	20434.8	FISH	p36.12	0.024	-0.398
19	RP11-132G19	1	21794.7	21969.8	TILE_C	p36.12	-0.178	-0.035
20	RP11-277F18	1	22562.3	22749.4	FISH	p36.12	-0.051	-0.535
21	RP11-72I19	1	23109.7	23287.2	BEP	p36.12	0.007	-0.272
22	RP11-57F20	1	23544.8	23723.2	BEP	p36.11	-0.083	-0.054
23	RP11-509F14	1	24369.9	24379.3	TILE_C	p36.11	0.053	-0.361
24	RP11-1055N23	1	24896.7	24897	STS_OUR	p36.11	-0.085	-0.245
25	RP11-285H13	1	26845.3	27028.3	BLAT	p36.11	-0.087	-0.291
26	RP11-4O6	1	27618.3	27783.5	BLAT	p35.3	-0.05	-0.073
27	RP11-1061A14	1	27811	27811.3	STS_OUR	p35.3	-0.18	0.003
28	RP11-276L11	1	30388.8	30389.2	FISH	p35.2	0.008	-0.299
29	RP11-104J13	1	30921.2	31084.3	BLAT	p35.2	-0.198	-0.415
30	RP11-84A19	1	31882.3	32006.7	TILE_C	p35.2	-0.034	-0.31
31	RP11-277A4	1	32171.5	32245.5	TILE_C	p35.2	-0.089	-0.109
32	RP11-390B02	1	32468.1	32468.3	STS_OUR	p35.1	-0.279	0.043
33	RP11-114B7	1	32770.5	32943.4	TILE_C	p35.1	0.025	-0.255
34	RP11-4P6	1	33046.7	33204.4	BEP	p35.1	-0.014	-0.245
35	RP11-51A20	1	33790.8	33842.7	FISH	p35.1	0.014	-0.393
36	RP11-327P22	1	34821.9	34842.6	TILE_C	p34.3	0.081	-0.286
37	RP11-118E03	1	34886.8	34887.2	STS_OUR	p34.3	0.013	-0.392
38	RP11-219O7	1	36711.1	36877.3	BLAT	p34.3	0.112	0.088
39	RP11-219O07	1	36740	36740.4	STS_OUR	p34.3	0.031	-0.447
40	RP11-1049A18	1	37176.4	37176.8	STS_OUR	p34.3	0.021	-0.34
41	RP11-207P5	1	37176.4	37176.8	FISH	p34.3	-0.042	-0.514
42	RP11-192A12	1	38923.7	39046.5	FISH	p34.3	0.125	-0.394
43	RP11-113D13	1	39204.4	39347.3	INHOUSE_SEQ	p34.3	-0.034	-0.219
44	RP11-204L3	1	39969.5	40094.4	FISH	p34.2	0.046	-0.213
45	RP11-1060H15	1	40384	40384.2	STS_OUR	p34.2	-0.009	0.083
46	RP11-1055L15	1	41925.7	41926	STS_OUR	p34.2	-0.005	-0.307
47	RP11-88O2	1	42090.2	42272.5	BLAT	p34.2	0.072	-0.193
48	RP11-342M1	1	42946.6	43028.3	TILE_C	p34.2	0.178	-0.168
49	RP11-184I16	1	43817.4	43959.3	TILE_C	p34.1	0.124	-0.266
50	RP11-182I23	1	44418.9	44505.3	TILE_C	p34.1	0.121	0.049
51	RP11-1040L17	1	45265	45265.3	STS_OUR	p34.1	0.011	0.169
52	RP11-62B23	1	45297.3	45454.2	BLAT	p34.1	0.011	-0.12
53	RP11-322N21	1	46321.9	46409.1	TILE_C	p33	0.083	-0.415
54	RP11-8J9	1	46824	46981.4	TILE_C	p33	0.146	-0.145
55	RP11-52I2	1	47620.1	47620.5	FISH	p33	-0.17	-0.047
56	RP11-330M19	1	47941.7	48142.1	TILE_C	p33	0.077	-0.339
57	RP11-428D12	1	48856.7	49042.4	TILE_C	p33	0.09	0.349
58	RP11-1049F03	1	50462.5	50462.7	STS_OUR	p32.3	0.046	-0.285
59	RP11-235B24	1	50462.5	50462.7	FISH	p32.3	0.047	-0.298
60	RP11-253A20	1	51595.4	51737.1	TILE_C	p32.3	0.032	-0.313
61	RP11-1013O06	1	52265.9	52266.1	STS_OUR	p32.3	-0.054	-0.204
62	RP11-450J3	1	52295	52464.7	BEP	p32.3	0.066	-0.084
63	RP11-117D22	1	53504.1	53571.6	TILE_C	p32.3	0.057	-0.285
64	RP11-195G13	1	54039.8	54232	BEP	p32.3	0.016	-0.146
65	RP11-399G2	1	55004.5	55151.4	BEP	p32.3	0.074	-0.471
66	RP11-547K22	1	55004.5	55151.4	INHOUSE_SEQ	p32.3	0.098	-0.084
67	RP11-55M23	1	55153.4	55324.3	BLAT	p32.3	-0.03	-0.351
68	RP11-1012H14	1	55722.1	55722.5	STS_OUR	p32.2	-0.004	-0.386
69	RP11-210E5	1	56315.1	56479.6	BEP	p32.2	0.033	-0.319
70	RP11-179F24	1	56347.6	56510.1	BEP	p32.2	0.071	-0.414
71	RP11-1004M15	1	56405.4	56405.8	STS_OUR	p32.2	0.009	0.106
72	RP11-1049P12	1	57290	57460	INHOUSE_SEQ	p32.2	-0.065	-0.335
73	RP11-149K24	1	57320.1	57320.4	FISH	p32.2	-0.046	-0.403
74	RP11-1041L10	1	57405.1	57405.4	STS_OUR	p32.2	-0.003	-0.34
75	RP11-1054O19	1	57405.1	57405.4	STS_OUR	p32.2	0.071	-0.285
76	RP11-1014E02	1	58248.9	58249.3	STS_OUR	p32.2	0.052	-0.221
77	RP11-12L18	1	58368.8	58369.1	INHOUSE_SEQ	p32.1	-0.024	-0.065
78	RP11-342F23	1	58679.9	58729.9	TILE_C	p32.1	0.038	-0.193
79	RP11-37M11	1	59878.8	60021.1	BEP	p32.1	0.082	-0.123
80	RP11-110A23	1	61084.8	61256.8	BEP	p31.3	0.01	-0.298
81	RP11-432N11	1	61450.3	61618.9	BEP	p31.3	0.024	0.039
82	RP11-430G17	1	61680.3	61920	TILE_C	p31.3	-0.108	-0.262
83	RP11-5P4	1	63162.3	63280.1	TILE_C	p31.3	0.069	-0.344
84	RP11-30A5	1	63401.5	63557	BLAT	p31.3	0.058	-0.291
85	RP11-265C4	1	64050	64199	BEP	p31.3	0.644	-0.454
86	RP11-272A1	1	65549.8	65550.2	FISH	p31.2	-0.062	0.139
87	RP11-1001K14	1	65592.7	65593	STS_OUR	p31.2	0.084	-0.542
88	RP11-412F21	1	69155	69303.9	BEP	p31.1	0.081	-0.013
89	RP11-111N18	1	69433.7	69575.4	BEP	p31.1	0.051	-0.116
90	RP11-1026M22	1	71130.1	71130.7	STS_OUR	p31.1	-0.133	-0.215
91	RP11-175G14	1	71867	71984.9	TILE_C	p31.1	0.074	-0.3
92	RP11-261J10	1	72752.6	72923.4	TILE_C	p31.1	0.028	-0.39
93	RP11-1012O01	1	72915.3	72915.6	STS_OUR	p31.1	0.028	-0.398
94	RP11-250D8	1	74414.3	74442.5	TILE_C	p31.1	0.034	-0.304
95	RP11-1017L22	1	74828.5	74828.8	STS_OUR	p31.1	0.008	-0.422
96	RP11-25F16	1	75174.1	75328.3	BEP	p31.1	0.067	-0.38
97	RP11-114K16	1	75425.1	75597.3	BEP	p31.1	-0.017	-0.151
98	RP11-80G24	1	77428.8	77502.2	FISH	p31.1	0.062	-0.34
99	RP11-306I4	1	77754.8	77820.1	TILE_C	p31.1	0.071	-0.39
100	RP11-412N22	1	78263.2	78430.9	BEP	p31.1	0.099	-0.207
101	RP11-1022F17	1	78320	78320.4	STS_OUR	p31.1	0.118	-0.267
102	RP11-198H14	1	78696.1	78696.5	FISH	p31.1	0.077	-0.086
103	RP11-143H12	1	78893.2	79075.2	TILE_C	p31.1	0.008	-0.268
104	RP11-1008H08	1	79199.3	79199.7	STS_OUR	p31.1	-0.003	-0.018
105	RP11-1022N14	1	79386.4	79386.8	STS_OUR	p31.1	0.003	-0.295
106	RP11-1061J23	1	79386.4	79386.8	STS_OUR	p31.1	0.076	-0.259
107	RP11-267M21	1	79681.5	79681.9	FISH	p31.1	0.028	-0.182
108	RP11-89A19	1	80866.1	81035.5	BEP	p31.1	-0.017	-0.103
109	RP11-398N17	1	82443.8	82542.8	TILE_C	p31.1	0.03	-0.281
110	RP11-1041C24	1	82480.1	82480.4	STS_OUR	p31.1	-0.121	-0.202
111	RP11-246O4	1	82952.8	83112.1	BEP	p31.1	0.008	-0.351
112	RP11-78E18	1	82980.7	83149.3	BEP	p31.1	0.033	-0.328
113	RP11-338F23	1	83433.9	83617.9	TILE_C	p31.1	0.03	0.034
114	RP11-254E16	1	84479.2	84628.9	BLAT	p22.3	0.023	-0.311
115	RP11-1008A10	1	84547.8	84548.2	STS_OUR	p22.3	0.037	-0.27
116	RP11-1012A09	1	84547.8	84548.2	STS_OUR	p22.3	0.289	0.302
117	RP11-118B23	1	84667.5	84793	TILE_C	p22.3	0.011	-0.282
118	RP11-473A22	1	85634.1	85813.3	BEP	p22.3	-0.019	-0.329
119	RP11-469D8	1	85634.2	85807.7	BEP	p22.3	0.006	-0.124
120	RP11-125P20	1	88031.4	88194.3	BEP	p22.2	0.072	-0.395
121	RP11-427B20	1	88566.3	88674.6	TILE_C	p22.2	-0.089	-0.174
122	RP11-413E1	1	89775.7	89960.9	TILE_C	p22.2	0.104	-0.155
123	RP11-298P9	1	90286.2	90386.4	TILE_C	p22.2	0.128	-0.063
124	RP11-148B18	1	94421.6	94578.7	TILE_C	p21.3	0.077	-0.18
125	RP11-366L18	1	94576.6	94672.6	TILE_C	p21.3	0.162	-0.225
126	RP11-14O19	1	95516.9	95561.1	TILE_C	p21.3	0.005	-0.439
127	RP11-146P11	1	95695.6	95868.7	TILE_C	p21.3	0.021	-0.384
128	RP11-122C9	1	96807.5	96994.9	TILE_C	p21.3	0.056	-0.33
129	RP11-128G13	1	97831.9	97942.9	TILE_C	p21.3	0.031	-0.458
130	RP11-17C2	1	98674.9	98779.3	TILE_C	p21.3	0.012	-0.246
131	RP11-138K16	1	99667.8	99843.8	TILE_C	p21.2	0.047	-0.348
132	RP11-421L21	1	101160	101353	TILE_C	p21.2	0.036	-0.226
133	RP11-182H2	1	101397	101398	FISH	p21.2	0.068	-0.254
134	RP11-178M11	1	101676	101838	BLAT	p21.1	0.014	-0.3
135	RP11-202K23	1	102306	102446	TILE_C	p21.1	-0.001	-0.199
136	RP11-1006C13	1	102708	102708	STS_OUR	p21.1	0.045	-0.282
137	RP11-1006E02	1	102708	102708	STS_OUR	p21.1	-0.025	-0.169
138	RP11-118G19	1	105379	105492	TILE_C	p21.1	-0.071	-0.119
139	RP11-90H3	1	106013	106172	TILE_C	p21.1	0.065	-0.062
140	RP11-162H15	1	106421	106561	BEP	p21.1	0.014	-0.079
141	RP11-91A21	1	106797	106958	INHOUSE_SEQ	p13.3	-0.007	-0.201
142	RP11-28P8	1	108087	108255	BEP	p13.3	0.133	-0.108
143	RP11-480G12	1	109570	109724	TIGR_SEQ	p13.3	-0.017	-0.205
144	RP11-1016H02	1	110411	110411	STS_OUR	p13.3	-0.008	0.024
145	RP11-260A24	1	110536	110698	BEP	p13.3	-0.053	0.031
146	RP11-284N8	1	110808	111001	TILE_C	p13.3	0.002	0.086
147	RP11-150K20	1	111044	111206	BEP	p13.2	0.025	0.119
148	RP11-1012N15	1	111836	112026	BEP	p13.2	-0.061	0.02
149	RP11-82A16	1	112220	112220	FISH	p13.2	0.007	0.025
150	RP11-88H9	1	112222	112392	TILE_C	p13.2	0.068	-0.088
151	RP11-72M14	1	112869	112904	TILE_C	p13.2	0.042	-0.02
152	RP11-31F15	1	113215	113284	TILE_C	p13.2	0.091	0.092
153	RP11-254K1	1	114738	114926	BEP	p13.1	0.068	-0.295
154	RP11-1013O12	1	115066	115066	STS_OUR	p13.1	-0.386	0.06
155	RP11-130B18	1	115661	115830	BLAT	p13.1	0.106	0.208
156	RP11-27K13	1	117191	117318	TILE_C	p12	0.044	0.269
157	RP11-1009B03	1	118215	118215	STS_OUR	p12	0.031	0.152
158	RP11-1009B10	1	118215	118215	STS_OUR	p12	0.108	0.193
159	RP11-1050B18	1	118215	118215	STS_OUR	p12	0.075	0.166
160	RP11-192J8	1	118215	118215	FISH	p12	0.031	0.095
161	RP11-63I1	1	118454	118624	BEP	p12	0.107	0.135
162	RP11-418J17	1	119412	119571	TILE_C	p12	-0.023	0.153
163	RP11-1014J07	1	119769	119770	STS_OUR	p11.2	0.017	0.364
164	RP11-29M22	1	119870	119981	FISH	p11.2	-0.065	0.449
165	RP11-326G21	1	142391	142548	TILE_C	q21.1	0.201	0.815
166	RP11-315I20	1	142928	143134	INHOUSE_SEQ	q21.1	0.046	0.576
167	RP11-30I17	1	142952	143140	INHOUSE_SEQ	q21.1	0.002	0.55
168	RP11-105E14	1	142963	143125	INHOUSE_SEQ	q21.1	0.098	0.311
169	RP11-533N14	1	144268	144380	TILE_C	q21.1	-0.014	0.842
170	RP11-401E10	1	144434	144502	INHOUSE_SEQ	q21.1	-0.099	0.652
171	RP11-301M17	1	144800	144991	INHOUSE_SEQ	q21.1	-0.084	0.65
172	RP11-71L20	1	148093	148238	BEP	q21.3	0.025	0.612
173	RP11-1054G11	1	148108	148350	INHOUSE_SEQ	q21.3	-0.304	0.46
174	RP11-98D18	1	148463	148627	TILE_C	q21.3	0.115	0.074
175	RP11-216N14	1	150501	150651	TILE_C	q21.3	0.091	0.389
176	RP11-422P24	1	150705	150881	TILE_C	q21.3	0.038	0.421
177	RP11-307C12	1	151657	151839	TILE_C	q22	0.06	0.351
178	RP11-98F1	1	152086	152090	TILE_C	q22	0.021	0.528
179	RP11-172I6	1	152893	152897	TILE_C	q22	-0.008	0.275
180	RP11-206M24	1	154603	154603	INHOUSE_SEQ	q23.1	-0.462	0.644
181	RP11-518H3	1	155087	155248	INHOUSE_SEQ	q23.1	-0.218	0.135
182	RP11-393K10	1	155656	155688	TILE_C	q23.1	0.011	0.543
183	RP11-190A12	1	156558	156697	TILE_C	q23.2	0.069	0.438
184	RP11-97G24	1	157289	157461	INHOUSE_SEQ	q23.2	0.016	0.379
185	RP11-8D14	1	157635	157635	INHOUSE_SEQ	q23.2	-0.016	0.206
186	RP11-137A12	1	157885	158056	INHOUSE_SEQ	q23.3	0.007	0.335
187	RP11-5K23	1	158226	158356	INHOUSE_SEQ	q23.3	-0.247	0.273
188	RP11-395A02	1	159089	159228	INHOUSE_SEQ	q23.3	-0.016	0.383
189	RP11-260G23	1	159178	159331	INHOUSE_SEQ	q23.3	-0.024	0.203
190	RP11-430G6	1	159689	159854	TILE_C	q23.3	0.056	0.542
191	RP11-522G14	1	159833	159972	INHOUSE_SEQ	q23.3	-0.008	0.079
192	RP11-541J2	1	160910	161094	TILE_C	q23.3	-0.043	0.253
193	RP11-355F24	1	161238	161408	INHOUSE_SEQ	q23.3	-0.136	0.526
194	RP11-80D6	1	161969	162113	INHOUSE_SEQ	q23.3	0.018	0.667
195	RP11-306I1	1	162274	162350	TILE_C	q23.3	0.016	0.544
196	RP11-277B15	1	163831	163953	TILE_C	q24.1	0.021	0.649
197	RP11-234M3	1	163891	164067	INHOUSE_SEQ	q24.1	-0.105	0.701
198	RP11-28D10	1	164336	164454	FISH	q24.1	0.01	0.587
199	RP11-1049M03	1	164391	164567	INHOUSE_SEQ	q24.2	0.034	0.429
200	RP11-167M6	1	164524	164697	BEP	q24.2	0.108	0.365
201	RP11-171H24	1	164986	164986	FISH	q24.2	-0.03	0.633
202	RP11-184N12	1	166889	167056	BEP	q24.2	0.044	0.59
203	RP11-277C14	1	168595	168751	TILE_C	q24.3	0.043	0.326
204	RP11-125J13	1	169637	169806	INHOUSE_SEQ	q24.3	-0.018	0.619
205	RP11-177M16	1	171094	171275	INHOUSE_SEQ	q25.1	-0.043	0.596
206	RP11-137N24	1	171853	171926	FISH	q25.1	0.055	0.48
207	RP11-1055F22	1	172254	172255	STS_OUR	q25.1	-0.091	0.63
208	RP11-4J2	1	173918	174099	INHOUSE_SEQ	q25.2	-0.096	0.66
209	RP11-163L4	1	174440	174440	INHOUSE_SEQ	q25.2	-0.079	0.476
210	RP11-46A10	1	177559	177761	INHOUSE_SEQ	q25.3	-0.017	0.551
211	RP11-71D4	1	179440	179511	TILE_C	q25.3	-0.033	0.776
212	RP11-212K9	1	179565	179721	INHOUSE_SEQ	q25.3	-0.105	0.559
213	RP11-293B7	1	180384	180414	TILE_C	q25.3	0.072	0.581
214	RP11-162L13	1	182449	182622	INHOUSE_SEQ	q25.3	0.05	0.402
215	RP11-1020G08	1	182553	182554	STS_OUR	q25.3	0.008	0.352
216	RP11-391A08	1	183373	183375	STS_OUR	q31.1	0.016	0.315
217	RP11-108M21	1	183908	184079	TILE_C	q31.1	-0.06	0.365
218	RP11-134C1	1	184717	184883	TILE_C	q31.1	-0.079	0.377
219	RP11-1049P03	1	184878	184878	STS_OUR	q31.1	-0.109	0.784
220	RP11-336D15	1	185871	185875	TILE_C	q31.1	-0.007	0.149
221	RP11-445K1	1	186717	186907	TILE_C	q31.1	-0.023	0.568
222	RP11-463J7	1	187358	187524	TILE_C	q31.1	-0.209	0.35
223	RP11-440G22	1	188607	188785	INHOUSE_SEQ	q31.2	-0.027	0.364
224	RP11-142L4	1	188882	188977	TILE_C	q31.2	-0.207	0.448
225	RP11-239J11	1	189820	189943	TILE_C	q31.2	-0.002	0.388
226	RP11-435N12	1	191663	191843	TILE_C	q31.3	0.007	0.13
227	RP11-552K17	1	192985	193083	TILE_C	q31.3	0.002	0.588
228	RP11-1045D15	1	193382	193383	STS_OUR	q31.3	-0.07	0.621
229	RP11-75C23	1	194119	194175	TILE_C	q31.3	0.037	0.59
230	RP11-1009D24	1	194899	195045	INHOUSE_SEQ	q31.3	0.142	0.432
231	RP11-404H1	1	195069	195218	TILE_C	q31.3	0.118	0.528
232	RP11-152M20	1	196294	196379	TILE_C	q32.1	0.076	0.456
233	RP11-249C10	1	196802	196953	BLAT	q32.1	0.076	0.207
234	RP11-469A15	1	197014	197179	TILE_C	q32.1	0.154	0.578
235	RP11-246J15	1	198813	198972	BEP	q32.1	0.072	0.59
236	RP11-572A16	1	198884	199061	TILE_C	q32.1	0.061	0.642
237	RP11-480I12	1	199440	199641	TILE_C	q32.1	0.043	0.09
238	RP11-70G20	1	200327	200327	FISH	q32.1	-0.005	0.317
239	RP11-563I16	1	201134	201134	INHOUSE_SEQ	q32.1	0.95	0.626
240	RP11-148K15	1	201303	201476	BEP	q32.1	0.716	0.582
241	RP11-243M13	1	201636	201795	BEP	q32.1	1.055	0.54
242	RP11-536L3	1	201725	201810	TILE_C	q32.1	0.89	0.602
243	RP11-383G10	1	201808	201989	TILE_C	q32.1	0.772	0.538
244	RP11-324K4	1	201828	201829	INHOUSE_SEQ	q32.1	0.761	0.438
245	RP11-390G11	1	201974	201974	STS_OUR	q32.1	0.793	0.354
246	RP11-249H15	1	202190	202253	FISH	q32.1	-0.122	0.451
247	RP11-1016G15	1	202447	202447	STS_OUR	q32.1	0.045	0.468
248	RP11-534L20	1	203028	203136	TILE_C	q32.1	0.062	0.596
249	RP11-564A8	1	203410	203602	TILE_C	q32.1	0.129	0.685
250	RP11-57I17	1	204134	204279	TILE_C	q32.1	0.117	0.558
251	RP11-45F21	1	204773	204952	BEP	q32.2	0.158	0.769
252	RP11-59A2	1	204934	205111	TILE_C	q32.2	0.085	0.762
253	RP11-385M4	1	205660	205834	TILE_C	q32.2	0.088	0.593
254	RP11-167J2	1	205974	206136	BLAT	q32.2	0.01	0.69
255	RP11-1055I10	1	206105	206106	STS_OUR	q32.2	0.111	0.496
256	RP11-104A2	1	206402	206591	BEP	q32.2	0.057	0.731
257	RP11-354K1	1	208181	208227	TILE_C	q32.2	0.139	0.417
258	RP11-1049P17	1	208245	208474	INHOUSE_SEQ	q32.2	0.026	0.36
259	RP11-216F1	1	208301	208499	BLAT	q32.2	0.08	0.202
260	RP11-216F01	1	208472	208472	STS_OUR	q32.2	0.129	0.555
261	RP11-193P21	1	209301	209458	BLAT	q32.3	0.108	0.301
262	RP11-286E7	1	209626	209803	TILE_C	q32.3	0.121	0.412
263	RP11-434B7	1	209801	209923	TILE_C	q32.3	0.095	0.67
264	RP11-74E6	1	210882	211052	BLAT	q32.3	0.115	0.575
265	RP11-402D7	1	210952	211024	TILE_C	q32.3	0.112	0.438
266	RP11-323K10	1	211462	211553	TILE_C	q32.3	0.045	0.847
267	RP11-438G15	1	212008	212080	TILE_C	q41	0.022	0.755
268	RP11-66M7	1	213532	213696	TILE_C	q41	0.007	0.743
269	RP11-260A10	1	213537	213696	BEP	q41	-0.011	0.579
270	RP11-66M07	1	213683	213683	STS_OUR	q41	0.048	0.571
271	RP11-241C9	1	213694	213795	TILE_C	q41	-0.054	0.672
272	RP11-211K12	1	215589	215589	FISH	q41	0.168	0.448
273	RP11-392O17	1	215801	215980	TILE_C	q41	0.109	0.615
274	RP11-492K2	1	215865	216065	INHOUSE_SEQ	q41	-0.062	0.731
275	RP11-332J14	1	217020	217188	TILE_C	q41	0.013	0.382
276	RP11-149C08	1	218545	218545	STS_OUR	q41	0.086	0.401
277	RP11-1049B12	1	219330	219330	STS_OUR	q41	0.021	-0.195
278	RP11-239E10	1	219658	219840	TILE_C	q41	0.083	0.38
279	RP11-1020E19	1	219766	219766	STS_OUR	q41	0.043	0.374
280	RP11-1022D07	1	219766	219766	STS_OUR	q41	0.123	0.207
281	RP11-105I12	1	220131	220312	TILE_C	q41	0.043	0.405
282	RP11-100E13	1	221003	221167	TILE_C	q42.11	0.145	0.346
283	RP11-566P1	1	223344	223540	BEP	q42.12	0.061	0.299
284	RP11-375H24	1	223371	223434	TILE_C	q42.12	0.006	0.317
285	RP11-1001P10	1	225907	225908	STS_OUR	q42.13	0.029	0.18
286	RP11-1003L01	1	227145	227146	STS_OUR	q42.13	-0.118	0.367
287	RP11-A99J16	1	227397	227397	INHOUSE_SEQ	q42.13	0.028	0.382
288	RP11-347P15	1	228454	228621	BEP	q42.2	0.009	0.285
289	RP11-336M13	1	228506	228686	TIGR_SEQ	q42.2	0.117	0.302
290	RP11-409F13	1	228574	228725	BEP	q42.2	0.068	0.227
291	RP11-1066A03	1	228674	228861	INHOUSE_SEQ	q42.2	0.001	0.337
292	RP11-317K3	1	228716	228879	BEP	q42.2	-0.078	0.43
293	RP11-210E16	1	228799	228978	BLAT	q42.2	0.048	0.415
294	RP11-87P4	1	229025	229162	TILE_C	q42.2	0.019	0.456
295	RP11-528D17	1	229941	230054	TILE_C	q42.2	0.084	0.508
296	RP11-509I1	1	232131	232211	TILE_C	q42.3	-0.015	0.473
297	RP11-1017M17	1	232220	232220	STS_OUR	q42.3	-0.84	0.254
298	RP11-433N10	1	234899	234924	TILE_C	q43	-0.05	0.397
299	RP11-359A17	1	235851	236040	TILE_C	q43	-0.025	0.215
300	RP11-1001I09	1	236198	236198	STS_OUR	q43	0.002	0.409
301	RP11-210F08	1	237932	237933	STS_OUR	q43	-0.006	0.514
302	RP11-553N16	1	238262	238406	TILE_C	q43	0.05	0.564
303	RP11-212E22	1	239148	239315	BLAT	q43	-0.08	0.336
304	RP11-411G13	1	239599	239755	TILE_C	q43	0.09	0.472
305	RP11-1015N18	1	240626	240627	STS_OUR	q44	0.028	-0.037
306	RP11-1020F17	1	240626	240627	STS_OUR	q44	0.157	-0.024
307	RP11-13L16	1	240751	240907	BEP	q44	-0.013	0.197
308	RP11-399B15	1	241482	241691	INHOUSE_SEQ	q44	0.081	0.079
309	RP11-551G24	1	243472	243540	TILE_C	q44	0.102	0.084
310	RP11-438H8	1	244273	244440	TILE_C	q44	0.074	0.076
311	RP11-541H10	2	178.917	363.11	INHOUSE_SEQ	p25.3	0.014	0.163
312	RP11-560J14	2	212.047	420.195	INHOUSE_SEQ	p25.3	0.036	0.094
313	RP11-496J19	2	731.429	915.588	BEP	p25.3	0.064	0.183
314	RP11-516I15	2	830.427	830.565	STS_OUR	p25.3	0.055	0.207
315	RP11-364B17	2	1482.63	1482.85	STS_OUR	p25.3	-0.225	0.096
316	RP11-513H7	2	4637.01	4825.92	TILE_C	p25.2	-0.11	0.043
317	RP11-567G4	2	4731.06	4731.16	STS_OUR	p25.2	-0.017	-0.028
318	RP11-555N13	2	6951.75	7140.81	BEP	p25.2	0.009	0.137
319	RP11-447O24	2	7134.71	7134.85	STS_OUR	p25.1	-0.077	-0.008
320	RP11-465O16	2	7134.71	7134.85	STS_OUR	p25.1	-0.25	0.112
321	RP11-512B10	2	7134.71	7134.85	STS_OUR	p25.1	-0.087	0.217
322	RP11-573F8	2	7134.71	7134.85	STS_OUR	p25.1	-0.053	0.133
323	RP11-543B1	2	8629.88	8827.69	BEP	p25.1	0.008	0.164
324	RP11-343I9	2	8639.08	8848.46	BEP	p25.1	0.068	0.102
325	RP11-370B14	2	8675.12	8864.59	BLAT	p25.1	0.094	-0.034
326	RP11-568N9	2	8812.75	8812.83	STS_OUR	p25.1	0.064	0.203
327	RP11-571A12	2	8812.75	8812.83	STS_OUR	p25.1	0.023	0.031
328	RP11-574L1	2	8812.75	8812.83	STS_OUR	p25.1	0.062	0.038
329	RP11-327F6	2	8814.52	9029.88	TILE_C	p25.1	0.196	0.168
330	RP11-368B17	2	8837.76	8838.06	STS_OUR	p25.1	0.046	-0.002
331	RP11-387M6	2	8837.76	8838.06	STS_OUR	p25.1	0.081	-0.005
332	RP11-424F11	2	8837.76	8838.06	STS_OUR	p25.1	0.065	0.166
333	RP11-398I20	2	8893.85	9090.64	BLAT	p25.1	0.137	0.162
334	RP11-303M14	2	8943.52	8943.62	STS_OUR	p25.1	0.042	0.24
335	RP11-374L16	2	8943.52	8943.62	STS_OUR	p25.1	0.164	0.122
336	RP11-459A4	2	9366.85	9367.2	INHOUSE_SEQ	p25.1	0.225	0.265
337	RP11-452F15	2	9420.64	9597.92	BEP	p25.1	-0.007	-0.01
338	RP11-532P2	2	9512.63	9512.82	INHOUSE_SEQ	p25.1	0.065	0.16
339	RP11-542H9	2	9602.02	9602.42	INHOUSE_SEQ	p25.1	0.106	0.199
340	RP11-557A1	2	9602.04	9602.42	INHOUSE_SEQ	p25.1	0.113	0.143
341	RP11-392K24	2	9920.03	10087.9	BEP	p25.1	0.092	0.022
342	RP11-299H10	2	9970.41	10167	BEP	p25.1	0.004	0.05
343	RP11-338K3	2	10082.7	10083	STS_OUR	p25.1	0.019	0.051
344	RP11-340M14	2	11755.7	11943.3	BLAT	p25.1	0.014	0.184
345	RP11-329A7	2	11801.5	11801.8	INHOUSE_SEQ	p25.1	0.037	0.197
346	RP11-400G6	2	11917.7	11918.1	STS_OUR	p25.1	0.011	0.209
347	RP11-363O19	2	11977.6	11978	TIGR_SEQ	p25.1	0.042	0.146
348	RP11-427D2	2	17671	17879.2	BLAT	p24.2	-0.058	-0.09
349	RP11-325P7	2	17792.8	17793.2	STS_OUR	p24.2	0.064	0.201
350	RP11-349H12	2	17792.8	17793.2	STS_OUR	p24.2	-0.049	-0.036
351	RP11-368E6	2	17792.8	17793.2	STS_OUR	p24.2	0.07	0.022
352	RP11-461G23	2	20297.9	20481.5	INHOUSE_SEQ	p24.1	0.044	0.238
353	RP11-327N17	2	20357.7	20531.1	TILE_C	p24.1	0.003	-0.045
354	RP11-373G10	2	20614.9	20807.2	BEP	p24.1	0.053	0.116
355	RP11-329G24	2	20794.4	20794.6	STS_OUR	p24.1	0.06	0.162
356	RP11-310O5	2	20966.4	20966.8	TIGR_SEQ	p24.1	0.02	0.085
357	RP11-426M3	2	21120.5	21292.8	BEP	p24.1	-0.001	0.223
358	RP11-575F23	2	23986.7	24182.4	BEP	p24.1	0.076	0.148
359	RP11-462B4	2	24112.1	24279.1	BEP	p23.3	-0.021	0.119
360	RP11-156M23	2	26226.4	26416.4	BEP	p23.3	-0.026	-0.248
361	RP11-439E13	2	26892.4	27102.6	BLAT	p23.3	-0.017	0.016
362	RP11-435G14	2	26915.4	26915.6	STS_OUR	p23.3	0.042	0.001
363	RP11-516G8	2	26915.4	26915.6	STS_OUR	p23.3	-0.039	-0.027
364	RP11-525I14	2	26915.4	26915.6	STS_OUR	p23.3	-0.025	-0.084
365	RP11-548J21	2	26915.4	26915.6	STS_OUR	p23.3	0.062	-0.133
366	RP11-365J10	2	27139.4	27301.7	BEP	p23.3	0.09	0.195
367	RP11-377G9	2	28445.2	28665.4	BLAT	p23.2	-0.056	0.031
368	RP11-563M21	2	28445.2	28665.4	BEP	p23.2	0.004	-0.028
369	RP11-558L2	2	28547.2	28547.5	STS_OUR	p23.2	0.108	0.208
370	RP11-290I24	2	30135.1	30299.2	BEP	p23.1	-0.046	0.248
371	RP11-572N23	2	30135.1	30299.2	BLAT	p23.1	-0.008	0.1
372	RP11-317C6	2	30235.8	30410.8	BEP	p23.1	0.011	0.015
373	RP11-289P10	2	30293.7	30294.1	STS_OUR	p23.1	-0.046	0.098
374	RP11-354I21	2	31296.5	31507	BEP	p23.1	0.001	-0.135
375	RP11-315D24	2	31402.7	31402.9	STS_OUR	p23.1	0.063	-0.19
376	RP11-324A9	2	31402.7	31402.9	STS_OUR	p23.1	0.064	-0.003
377	RP11-377C24	2	31402.7	31402.9	STS_OUR	p23.1	-0.026	0
378	RP11-424N16	2	32854.4	33066.5	BEP	p22.3	-0.075	-0.049
379	RP11-513B5	2	32854.4	33066.5	BLAT	p22.3	-0.334	0.093
380	RP11-355A13	2	32957.6	32957.7	STS_OUR	p22.3	-0.037	-0.013
381	RP11-309F8	2	36668.7	36832.9	BEP	p22.2	0.08	0.245
382	RP11-326N24	2	36691.1	36691.2	STS_OUR	p22.2	0.079	0.269
383	RP11-316D17	2	36830.9	36986.3	BEP	p22.2	-0.05	0.068
384	RP11-323F21	2	36982.6	36982.9	STS_OUR	p22.2	-0.061	0.051
385	RP11-324B8	2	36982.6	36982.9	STS_OUR	p22.2	0.014	0.068
386	RP11-324F8	2	36982.6	36982.9	STS_OUR	p22.2	-0.007	0.103
387	RP11-361L12	2	39008.8	39171.8	BEP	p22.1	0.022	-0.03
388	RP11-304F6	2	39129	39129.3	STS_OUR	p22.1	-0.184	-0.237
389	RP11-364K10	2	39476	39476.4	INHOUSE_SEQ	p22.1	-0.025	-0.187
390	RP11-395B14	2	39597.4	39749.6	TILE_C	p22.1	-0.127	-0.131
391	RP11-381J7	2	42277.9	42476.9	BLAT	p21	-0.087	-0.003
392	RP11-379A23	2	42318	42393.9	TILE_C	p21	0.156	-0.015
393	RP11-299C5	2	42391.9	42576.9	TILE_C	p21	0.066	0.162
394	RP11-364J21	2	42471.2	42471.3	STS_OUR	p21	0.04	0.302
395	RP11-303H20	2	44393.7	44579.8	INHOUSE_SEQ	p21	0.18	0.262
396	RP11-380H12	2	44500.7	44700.1	BEP	p21	0.143	0.226
397	RP11-315G14	2	44524.9	44686.1	BEP	p21	-0.081	0.256
398	RP11-298E6	2	44530.2	44724.6	TILE_C	p21	-0.158	-0.1
399	RP11-302I9	2	44538.1	44538.4	STS_OUR	p21	0.063	-0.153
400	RP11-308A5	2	44538.1	44538.4	STS_OUR	p21	0.104	0.271
401	RP11-538G12	2	44911	44911.4	STS_OUR	p21	-0.277	-0.021
402	RP11-426E7	2	46441.3	46441.5	STS_OUR	p21	0.097	-0.065
403	RP11-427J22	2	46441.3	46441.5	STS_OUR	p21	0.128	0.097
404	RP11-355F8	2	46525.3	46525.4	STS_OUR	p21	0.075	-0.032
405	RP11-370N7	2	46525.3	46525.4	STS_OUR	p21	0.108	0.076
406	RP11-399M11	2	46525.3	46525.4	STS_OUR	p21	0.013	-0.104
407	RP11-344E15	2	49960	50128.2	BEP	p16.3	0.084	0.053
408	RP11-325B15	2	50060	50060.3	STS_OUR	p16.3	0.017	0.099
409	RP11-369H15	2	50060	50060.3	STS_OUR	p16.3	0.044	-0.009
410	RP11-415F4	2	50060	50060.3	STS_OUR	p16.3	0.069	0.199
411	RP11-432O23	2	50060	50060.3	STS_OUR	p16.3	-0.028	0.186
412	RP11-333A4	2	50203	50203.3	TIGR_SEQ	p16.3	-0.003	0.063
413	RP11-490B5	2	50994.2	51177.4	BEP	p16.3	-0.048	0.16
414	RP11-509H23	2	51022.9	51023	STS_OUR	p16.3	-0.478	0.206
415	RP11-570N24	2	53624.4	53819.7	INHOUSE_SEQ	p16.2	-0.036	0.021
416	RP11-473O22	2	53710.2	53915.6	INHOUSE_SEQ	p16.2	0.013	0.119
417	RP11-463E11	2	53714.4	53881	INHOUSE_SEQ	p16.2	-0.052	0.077
418	RP11-459G11	2	53749.7	53938.7	INHOUSE_SEQ	p16.2	-0.144	0.041
419	RP11-534D18	2	53749.7	53914.1	INHOUSE_SEQ	p16.2	-0.018	0.118
420	RP11-554J4	2	55658.9	55850.4	TILE_C	p16.1	0.043	0.155
421	RP11-334C24	2	58302.5	58302.8	STS_OUR	p16.1	0.074	0.044
422	RP11-338K4	2	58302.5	58302.8	STS_OUR	p16.1	-0.052	0.012
423	RP11-430K4	2	58302.5	58302.8	STS_OUR	p16.1	-0.061	-0.005
424	RP11-335K20	2	60569.7	60741.3	INHOUSE_SEQ	p16.1	-0.282	0.127
425	RP11-426O16	2	60653.6	60841.3	INHOUSE_SEQ	p16.1	-0.184	0.054
426	RP11-426N15	2	60653.6	60841.3	INHOUSE_SEQ	p16.1	-0.112	0.226
427	RP11-344M12	2	60940.6	60940.8	STS_OUR	p16.1	-0.021	0.097
428	RP11-334N22	2	62139.7	62274.8	STS_OUR	p15	-0.192	0.079
429	RP11-416F5	2	62139.7	62274.8	STS_OUR	p15	-0.411	0.132
430	RP11-349N21	2	62178.6	62348.2	BEP	p15	-0.07	-0.037
431	RP11-320C6	2	63955	64132.2	BLAT	p15	0.137	0.188
432	RP11-448E21	2	64677.2	64856.8	INHOUSE_SEQ	p14	0.037	0.222
433	RP11-494E18	2	64729.1	64918.5	BEP	p14	0.056	0.337
434	RP11-451M22	2	64734.3	64918.6	TILE_C	p14	0.018	0.251
435	RP11-515N2	2	64804.2	65009.5	INHOUSE_SEQ	p14	-0.122	0.167
436	RP11-519H21	2	65411.7	65591.5	INHOUSE_SEQ	p14	-0.253	0.095
437	RP11-559A23	2	66633.1	66808.1	BLAT	p14	-0.301	0.108
438	RP11-552G21	2	66633.1	66803.8	INHOUSE_SEQ	p14	-0.214	0.167
439	RP11-421J1	2	66634.7	66774.4	INHOUSE_SEQ	p14	-0.17	0.204
440	RP11-444B4	2	66674.5	66867.8	TILE_C	p14	-0.052	0.2
441	RP11-526G13	2	66694.4	66694.8	STS_OUR	p14	-0.009	0.141
442	RP11-529G9	2	66694.4	66694.8	STS_OUR	p14	-0.189	0.08
443	RP11-567J10	2	69088.9	69089.3	TIGR_SEQ	p13.3	-0.413	0.162
444	RP11-435E1	2	69233.2	69233.6	STS_OUR	p13.3	-0.311	0.084
445	RP11-452A5	2	71219.6	71412.3	BLAT	p13.3	-0.083	0.005
446	RP11-376N6	2	74444.1	74622.1	INHOUSE_SEQ	p13.1	-0.136	0.226
447	RP11-568A9	2	75457.5	75647.8	BLAT	p12	0.095	0.178
448	RP11-433F19	2	75567.3	75726.9	BEP	p12	0.076	0.092
449	RP11-494K13	2	76256.1	76415	BEP	p12	-0.196	0.176
450	RP11-349I18	2	79064.7	79262.3	BLAT	p12	-0.015	0.051
451	RP11-295G11	2	79262.1	79309.5	TILE_C	p12	-0.02	0.115
452	RP11-425H16	2	80460.3	80639.8	BEP	p12	-0.008	0.103
453	RP11-369G2	2	80512.6	80512.8	STS_OUR	p12	-0.05	0.05
454	RP11-385H11	2	84562.3	84564.3	STS_OUR	p11.2	0.087	0.021
455	RP11-388K1	2	84562.3	84564.3	STS_OUR	p11.2	-0.015	0.057
456	RP11-328C1	2	85426.5	85591.3	INHOUSE_SEQ	p11.2	-0.087	0.108
457	RP11-372G19	2	85662.3	85874.4	BEP	p11.2	-0.021	-0.012
458	RP11-424H1	2	86588.1	86757	BEP	p11.2	-0.034	0.094
459	RP11-371N9	2	87039.5	87222.3	INHOUSE_SEQ	p11.2	-0.003	-0.125
460	RP11-335D19	2	87086.5	87244.3	INHOUSE_SEQ	p11.2	0.008	-0.119
461	RP11-295P3	2	87958.7	87959.1	TIGR_SEQ	p11.2	-0.056	-0.038
462	RP11-468G5	2	95325.5	95527.9	TILE_C	q11.1	-0.022	-0.232
463	RP11-556E17	2	95346.7	95526.4	BEP	q11.1	-0.229	-0.34
464	RP11-440D17	2	95564	95734.1	TILE_C	q11.1	-0.044	-0.309
465	RP11-431B6	2	96654.6	96821.5	BLAT	q11.2	-0.252	-0.246
466	RP11-466M9	2	96662.8	96834.4	BEP	q11.2	-0.089	-0.272
467	RP11-432G9	2	96671.9	96824.5	BEP	q11.2	-0.192	-0.23
468	RP11-310G17	2	96727.4	96898.5	BLAT	q11.2	-0.243	-0.24
469	RP11-314H14	2	96898.5	97106.8	BEP	q11.2	-0.059	-0.213
470	RP11-496K6	2	97922.4	98121.6	BEP	q11.2	0.002	-0.119
471	RP11-507M18	2	98065.1	98065.2	STS_OUR	q11.2	-0.042	-0.14
472	RP11-292K15	2	100366	100536	TILE_C	q11.2	-0.041	-0.242
473	RP11-299B17	2	100386	100528	BEP	q11.2	0.022	-0.167
474	RP11-381B15	2	100438	100439	INHOUSE_SEQ	q11.2	-0.249	-0.204
475	RP11-389I11	2	100637	100637	INHOUSE_SEQ	q11.2	-0.017	-0.292
476	RP11-535N7	2	101815	101999	BLAT	q11.2	-0.034	-0.266
477	RP11-471C5	2	101969	101969	STS_OUR	q11.2	-0.117	-0.308
478	RP11-503P18	2	105214	105403	BEP	q12.1	-0.165	-0.265
479	RP11-533H1	2	105270	105453	TIGR_SEQ	q12.1	-0.07	-0.269
480	RP11-379M6	2	106440	106593	BEP	q12.2	-0.02	-0.233
481	RP11-400G9	2	106513	106654	TIGR_SEQ	q12.2	-0.083	-0.212
482	RP11-519H15	2	106939	107129	TILE_C	q12.2	-0.169	-0.304
483	RP11-464P18	2	106963	107146	BEP	q12.2	-0.089	-0.25
484	RP11-464O17	2	107016	107017	STS_OUR	q12.2	-0.222	-0.229
485	RP11-491K15	2	107016	107017	STS_OUR	q12.2	-0.158	-0.296
486	RP11-506J5	2	107016	107017	STS_OUR	q12.2	-0.031	-0.336
487	RP11-535B24	2	107016	107017	STS_OUR	q12.2	-0.272	-0.246
488	RP11-555H19	2	107016	107017	STS_OUR	q12.2	-0.025	-0.336
489	RP11-337D5	2	107779	107975	TILE_C	q12.3	0.031	-0.321
490	RP11-385J6	2	109897	110053	TILE_C	q12.3	0.024	-0.28
491	RP11-546H16	2	111948	112107	BEP	q13	0.014	-0.085
492	RP11-336A11	2	112448	112448	STS_OUR	q13	0.051	-0.137
493	RP11-376A18	2	112448	112448	STS_OUR	q13	0.083	-0.171
494	RP11-311P22	2	112663	112844	BLAT	q13	0.108	-0.04
495	RP11-342G16	2	112678	112876	TIGR_SEQ	q13	0.105	-0.14
496	RP11-432G15	2	114143	114285	TILE_C	q13	0.021	-0.337
497	RP11-394P10	2	114181	114181	STS_OUR	q13	0.065	-0.274
498	RP11-438O12	2	120629	120846	TILE_C	q14.2	-0.043	-0.303
499	RP11-473A19	2	121691	121862	BEP	q14.2	0.079	-0.343
500	RP11-441P2	2	121812	121813	STS_OUR	q14.2	0.098	-0.242
501	RP11-548P24	2	121981	122150	BEP	q14.2	-0.027	-0.258
502	RP11-473A8	2	122044	122045	STS_OUR	q14.2	-0.403	-0.255
503	RP11-520C24	2	122163	122324	BEP	q14.2	-0.001	-0.258
504	RP11-437O15	2	122523	122727	BLAT	q14.3	-0.098	-0.295
505	RP11-455E23	2	122687	122688	STS_OUR	q14.3	-0.131	-0.296
506	RP11-473E13	2	122687	122688	STS_OUR	q14.3	-0.024	-0.33
507	RP11-524J6	2	122687	122688	STS_OUR	q14.3	0.069	-0.322
508	RP11-505O20	2	126984	127182	TILE_C	q14.3	-0.119	-0.298
509	RP11-498J1	2	127036	127221	BEP	q14.3	-0.248	-0.239
510	RP11-449E5	2	127170	127170	STS_OUR	q14.3	-0.112	-0.3
511	RP11-458I6	2	127170	127170	STS_OUR	q14.3	-0.097	-0.29
512	RP11-538H7	2	127491	127672	BLAT	q14.3	-0.193	-0.231
513	RP11-335K12	2	135429	135587	BLAT	q21.3	-0.069	-0.29
514	RP11-461C18	2	135762	135762	STS_OUR	q21.3	-0.158	-0.256
515	RP11-496P4	2	135762	135762	STS_OUR	q21.3	-0.304	-0.129
516	RP11-546F10	2	135762	135762	STS_OUR	q21.3	-0.025	-0.244
517	RP11-406M16	2	136342	136481	BEP	q21.3	0.058	-0.248
518	RP11-329I10	2	136414	136606	TILE_UF	q21.3	0.047	-0.081
519	RP11-360I21	2	136436	136436	STS_OUR	q21.3	0.03	-0.249
520	RP11-323O7	2	143997	143997	INHOUSE_SEQ	q22.2	-0.034	-0.303
521	RP11-394B6	2	143999	144168	INHOUSE_SEQ	q22.2	-0.015	-0.183
522	RP11-420G10	2	144654	144815	BEP	q22.3	-0.189	-0.242
523	RP11-317L19	2	144792	144971	BEP	q22.3	-0.067	-0.349
524	RP11-379G6	2	145075	145269	BLAT	q22.3	0.019	-0.28
525	RP11-352K20	2	152168	152168	STS_OUR	q23.3	-0.079	-0.144
526	RP11-389K15	2	153987	154179	BEP	q23.3	0.099	-0.097
527	RP11-335C15	2	155495	155685	BLAT	q24.1	0.036	-0.227
528	RP11-389E16	2	157840	158017	TILE_C	q24.1	0.028	-0.187
529	RP11-396L5	2	159256	159433	BLAT	q24.1	0.101	-0.244
530	RP11-349H18	2	159363	159363	STS_OUR	q24.1	0.009	-0.258
531	RP11-343J7	2	159683	159882	BLAT	q24.1	0.012	-0.254
532	RP11-327B4	2	160984	161138	BEP	q24.2	-0.024	-0.291
533	RP11-362A7	2	161741	161927	BLAT	q24.2	0.06	-0.148
534	RP11-307A5	2	161918	161918	STS_OUR	q24.2	-0.008	-0.145
535	RP11-416P13	2	162669	162846	BLAT	q24.2	0.103	-0.335
536	RP11-419I11	2	162706	162899	BEP	q24.2	0.045	-0.241
537	RP11-428M1	2	162729	162916	BEP	q24.2	0.001	-0.282
538	RP11-411A9	2	165211	165368	BLAT	q24.3	0.045	-0.28
539	RP11-423K5	2	168797	168953	BEP	q24.3	0.065	-0.293
540	RP11-438M21	2	169456	169457	STS_OUR	q24.3	-0.044	-0.246
541	RP11-446K13	2	171672	171857	BLAT	q31.1	0.369	-0.138
542	RP11-437G23	2	171674	171674	STS_OUR	q31.1	-0.504	-0.31
543	RP11-470B3	2	171897	172076	INHOUSE_SEQ	q31.1	0.023	-0.15
544	RP11-468J23	2	171897	172059	INHOUSE_SEQ	q31.1	-0.062	-0.227
545	RP11-470A4	2	171897	172076	INHOUSE_SEQ	q31.1	0.147	-0.2
546	RP11-465K11	2	171925	172087	INHOUSE_SEQ	q31.1	-0.334	-0.115
547	RP11-470A2	2	172075	172076	INHOUSE_SEQ	q31.1	0.054	-0.291
548	RP11-343H18	2	175822	176019	BLAT	q31.1	-0.078	-0.263
549	RP11-352I1	2	178180	178370	BEP	q31.2	0.081	-0.159
550	RP11-299N22	2	180444	180646	BLAT	q31.2	0.074	-0.107
551	RP11-328I19	2	180526	180527	STS_OUR	q31.2	0.104	-0.124
552	RP11-450A3	2	185437	185437	STS_OUR	q32.1	-0.017	-0.129
553	RP11-497K20	2	185437	185437	STS_OUR	q32.1	-0.448	-0.381
554	RP11-439C13	2	187261	187436	BLAT	q32.1	-0.155	-0.166
555	RP11-556A11	2	187271	187467	TILE_C	q32.1	-0.007	-0.249
556	RP11-435G2	2	187386	187387	STS_OUR	q32.1	-0.02	-0.256
557	RP11-417H10	2	190137	190294	BLAT	q32.2	0.106	-0.172
558	RP11-328L10	2	190166	190166	STS_OUR	q32.2	0.061	-0.183
559	RP11-315D12	2	190185	190376	BEP	q32.2	0.02	-0.254
560	RP11-383O1	2	190203	190369	TILE_UF_MULTI	q32.2	-0.006	-0.382
561	RP11-349B22	2	190267	190267	STS_OUR	q32.2	-0.055	-0.038
562	RP11-536O8	2	191055	191246	BLAT	q32.2	0.061	-0.249
563	RP11-469O10	2	191061	191062	STS_OUR	q32.2	0.038	-0.29
564	RP11-536M8	2	191061	191062	STS_OUR	q32.2	0.104	-0.269
565	RP11-336L9	2	191081	191290	BLAT	q32.2	-0.192	-0.482
566	RP11-437B21	2	192428	192595	BLAT	q32.3	-0.017	-0.263
567	RP11-498E22	2	192530	192530	STS_OUR	q32.3	0.051	-0.223
568	RP11-518G19	2	192530	192530	STS_OUR	q32.3	-0.011	-0.21
569	RP11-564H13	2	192530	192530	STS_OUR	q32.3	0.017	-0.256
570	RP11-449J2	2	196328	196453	TILE_C	q32.3	-0.079	-0.166
571	RP11-308C21	2	197968	198189	BLAT	q33.1	-0.116	-0.351
572	RP11-535C14	2	203438	203598	BEP	q33.2	-0.152	-0.287
573	RP11-480M12	2	203438	203621	TIGR_SEQ	q33.2	-0.171	-0.38
574	RP11-553O13	2	203463	203625	TIGR_SEQ	q33.2	-0.075	-0.243
575	RP11-475D24	2	206170	206383	BLAT	q33.3	0.169	-0.243
576	RP11-522F7	2	207157	207312	BLAT	q33.3	-0.013	-0.219
577	RP11-455J6	2	207311	207311	STS_OUR	q33.3	0.074	-0.27
578	RP11-504E22	2	207311	207311	STS_OUR	q33.3	0.013	-0.118
579	RP11-553P21	2	207311	207311	STS_OUR	q33.3	0.044	-0.175
580	RP11-534O18	2	208386	208556	INHOUSE_SEQ	q33.3	-0.138	-0.251
581	RP11-487E7	2	208433	208607	INHOUSE_SEQ	q33.3	-0.097	-0.306
582	RP11-555P15	2	208437	208600	INHOUSE_SEQ	q33.3	-0.207	-0.292
583	RP11-559J5	2	210373	210547	TILE_C	q34	-0.046	-0.254
584	RP11-437J20	2	210518	210669	BLAT	q34	-0.07	-0.206
585	RP11-480H22	2	210523	210524	STS_OUR	q34	-0.012	-0.188
586	RP11-496I15	2	210523	210524	STS_OUR	q34	-0.058	-0.192
587	RP11-481K11	2	211239	211413	BLAT	q34	-0.206	-0.261
588	RP11-436P9	2	212015	212198	BLAT	q34	-0.113	-0.034
589	RP11-568E19	2	212076	212241	INHOUSE_SEQ	q34	-0.161	0.291
590	RP11-461F12	2	212132	212292	INHOUSE_SEQ	q34	0.029	0.134
591	RP11-501N3	2	215471	215669	BEP	q35	0.077	0.007
592	RP11-458B8	2	215888	216058	BEP	q35	0.026	-0.055
593	RP11-552M21	2	216012	216180	BLAT	q35	-0.008	-0.193
594	RP11-565A13	2	216036	216191	INHOUSE_SEQ	q35	-0.077	-0.259
595	RP11-439K20	2	216051	216051	STS_OUR	q35	0.009	-0.272
596	RP11-523J8	2	216051	216051	STS_OUR	q35	-0.033	-0.118
597	RP11-494F1	2	216555	216731	BLAT	q35	-0.007	-0.06
598	RP11-422C24	2	216855	217055	BLAT	q35	-0.037	-0.283
599	RP11-439G1	2	217193	217193	STS_OUR	q35	-0.381	-0.296
600	RP11-414I16	2	218084	218265	TIGR_SEQ	q35	0.008	-0.426
601	RP11-531J9	2	218101	218259	BEP	q35	-0.063	-0.21
602	RP11-342K7	2	218128	218296	TIGR_SEQ	q35	0.076	-0.336
603	RP11-395D4	2	218213	218411	TIGR_SEQ	q35	0.052	-0.243
604	RP11-316O14	2	220032	220216	TILE_C	q35	-0.056	-0.357
605	RP11-305J20	2	220097	220277	BLAT	q35	0.005	-0.155
606	RP11-338C17	2	220230	220230	STS_OUR	q35	-0.023	-0.321
607	RP11-373K23	2	220230	220230	STS_OUR	q35	0.077	-0.231
608	RP11-406B9	2	220230	220230	STS_OUR	q35	-0.151	-0.151
609	RP11-408H14	2	223615	223762	BLAT	q36.1	0.035	-0.157
610	RP11-509B8	2	224166	224341	BLAT	q36.1	0.046	-0.153
611	RP11-337K4	2	225070	225246	BLAT	q36.1	-0.276	-0.274
612	RP11-385C24	2	225242	225242	STS_OUR	q36.1	0.082	-0.343
613	RP11-528L9	2	229816	229995	BEP	q36.3	-0.552	-0.05
614	RP11-499F5	2	229831	229831	STS_OUR	q36.3	0.263	-0.356
615	RP11-529L10	2	229831	229831	STS_OUR	q36.3	-0.129	-0.504
616	RP11-555B22	2	229831	229831	STS_OUR	q36.3	0.241	-0.378
617	RP11-474O20	2	229955	229956	STS_OUR	q36.3	-0.08	-0.287
618	RP11-494H18	2	229955	229956	STS_OUR	q36.3	-0.003	-0.326
619	RP11-546O5	2	229955	229956	STS_OUR	q36.3	0.084	-0.311
620	RP11-555A22	2	229955	229956	STS_OUR	q36.3	0.249	-0.346
621	RP11-559F5	2	229955	229956	STS_OUR	q36.3	0.203	-0.311
622	RP11-549L1	2	230001	230092	TILE_C	q36.3	0.199	-0.257
623	RP11-552D9	2	230869	231035	INHOUSE_SEQ	q36.3	0.016	-0.31
624	RP11-532K23	2	230954	231137	INHOUSE_SEQ	q36.3	0.084	-0.338
625	RP11-543M2	2	230968	231130	INHOUSE_SEQ	q36.3	0.096	-0.336
626	RP11-493N24	2	230968	231130	INHOUSE_SEQ	q36.3	0.092	-0.366
627	RP11-558E6	2	232007	232223	INHOUSE_SEQ	q37.1	0.041	-0.247
628	RP11-562I5	2	232063	232251	INHOUSE_SEQ	q37.1	0.25	-0.138
629	RP11-427I23	2	232493	232659	INHOUSE_SEQ	q37.1	0.21	-0.35
630	RP11-515D18	2	233425	233605	INHOUSE_SEQ	q37.1	0.129	-0.351
631	RP11-542K15	2	233449	233607	INHOUSE_SEQ	q37.1	0.219	-0.313
632	RP11-494A5	2	233535	233701	INHOUSE_SEQ	q37.1	-0.076	-0.594
633	RP11-494B5	2	233535	233701	INHOUSE_SEQ	q37.1	-0.019	-0.55
634	RP11-563N18	2	233973	234187	INHOUSE_SEQ	q37.1	-0.23	-0.478
635	RP11-508K7	2	234030	234180	INHOUSE_SEQ	q37.1	0.044	-0.524
636	RP11-519C4	2	234356	234535	INHOUSE_SEQ	q37.1	0.075	-0.412
637	RP11-518G14	2	234403	234575	INHOUSE_SEQ	q37.1	0.079	-0.378
638	RP11-505J15	2	234409	234591	INHOUSE_SEQ	q37.1	0.029	-0.388
639	RP11-546E12	2	234574	234798	INHOUSE_SEQ	q37.1	0.039	-0.308
640	RP11-445N24	2	237758	237928	INHOUSE_SEQ	q37.3	0.241	-0.335
641	RP11-453O3	2	238591	238787	INHOUSE_SEQ	q37.3	0.256	-0.493
642	RP11-526L8	2	238776	238935	TILE_C	q37.3	-0.119	-0.481
643	RP11-498I9	2	238961	238961	INHOUSE_SEQ	q37.3	-0.313	-0.527
644	RP11-556N1	2	239135	239137	STS_OUR	q37.3	0.249	-0.335
645	RP11-554J14	2	241148	241311	INHOUSE_SEQ	q37.3	-0.055	-0.481
646	RP11-443J4	2	241311	241311	INHOUSE_SEQ	q37.3	0.004	-0.439
647	RP11-129K01	3	2343.09	2343.5	STS_OUR	p26.3	-0.009	0.25
648	RP11-63O1	3	2443.36	2619.41	TILE_C	p26.3	-0.192	0.182
649	RP11-129L14	3	2675.49	2675.75	FISH	p26.3	-0.176	0.167
650	RP11-453F3	3	3754.64	3943.35	TILE_C	p26.2	0.017	0.127
651	RP11-32F23	3	4016.4	4198.47	FISH	p26.1	0.053	0.271
652	RP11-183N22	3	4328.22	4493.7	TILE_C	p26.1	0.047	-0.174
653	RP11-33E18	3	5501.9	5696.87	INHOUSE_SEQ	p26.1	0.083	0.149
654	RP11-28P14	3	6823.32	7009.67	BEP	p26.1	-0.208	0.185
655	RP11-669E3	3	7204.22	7383.39	INHOUSE_SEQ	p26.1	0.012	0.13
656	RP11-294L5	3	7387.5	7540.75	BEP	p26.1	-0.187	0.169
657	RP11-21J23	3	8028.4	8190.54	BEP	p26.1	0.054	0.128
658	RP11-128A5	3	8686.06	8857.27	TILE_C	p25.3	-0.01	0.181
659	RP11-19E8	3	8917.08	9067.34	TILE_C	p25.3	0.102	0.067
660	RP11-402P11	3	9796.92	9931.13	FISH	p25.3	0.051	0.035
661	RP11-1009J05	3	10643.5	10643.8	STS_OUR	p25.3	0.007	0.143
662	RP11-115G3	3	10788.4	10947.4	BEP	p25.3	0.007	0.07
663	RP11-1017A06	3	11492.2	11492.5	STS_OUR	p25.3	-0.559	0.077
664	RP11-175G07	3	11492.2	11492.5	STS_OUR	p25.3	0.113	0.018
665	RP11-625C9	3	11757.8	11944.9	BEP	p25.2	0.018	0.1
666	RP11-470I10	3	13458	13675.4	TILE_C	p25.1	-0.076	-0.061
667	RP11-271E2	3	13892.3	14053.9	TILE_C	p25.1	0.06	-0.034
668	RP11-1003P23	3	13901	13901.2	STS_OUR	p25.1	0.028	0.082
669	RP11-121D03	3	14342.8	14343.1	STS_OUR	p25.1	0.034	0.054
670	RP11-72K12	3	15107.5	15288.4	INHOUSE_SEQ	p25.1	-0.011	0.098
671	RP11-279L16	3	15213.3	15387.2	FISH	p25.1	0.142	0.034
672	RP11-1014N11	3	15272.1	15272.5	STS_OUR	p25.1	0.015	0.058
673	RP11-255O19	3	15780.4	15940.6	TILE_C	p25.1	0.055	0.022
674	RP11-1015N05	3	16219.8	16220.2	STS_OUR	p25.1	0.209	0.319
675	RP11-125A16	3	16330.4	16490.5	INHOUSE_SEQ	p24.3	0.026	0.008
676	RP11-1047F22	3	19509.1	19509.4	STS_OUR	p24.3	0.065	0.186
677	RP11-197J13	3	20148.5	20294.5	TILE_C	p24.3	0.044	0.045
678	RP11-484G2	3	22145.7	22313.1	BLAT	p24.3	0.095	0.183
679	RP11-208G16	3	22372.6	22514.8	TILE_C	p24.3	-0.144	0.054
680	RP11-245E05	3	22913.7	22914.1	STS_OUR	p24.3	-0.091	0.251
681	RP11-41F05	3	23814.4	23814.8	STS_OUR	p24.2	-0.02	-0.166
682	RP11-421F9	3	25448	25518.5	TILE_C	p24.2	0.03	-0.316
683	RP11-1048J17	3	27932.4	27932.7	STS_OUR	p24.1	-0.192	-0.169
684	RP11-11L6	3	28645.9	28824.4	TILE_C	p24.1	-0.03	-0.144
685	RP11-1018E02	3	30652.5	30652.9	STS_OUR	p24.1	-0.064	-0.189
686	RP11-1041C16	3	30652.5	30652.9	STS_OUR	p24.1	-0.046	-0.176
687	RP11-167C9	3	30705.9	30890.2	TILE_C	p24.1	0.011	-0.258
688	RP11-56P22	3	34981.2	35131.1	TILE_C	p22.3	-0.768	-0.088
689	RP11-172A18	3	35799.4	35982.6	INHOUSE_SEQ	p22.3	-0.402	-0.21
690	RP11-286G05	3	36459.1	36459.5	STS_OUR	p22.3	-0.077	-0.065
691	RP11-1013M04	3	37366.6	37446.1	INHOUSE_SEQ	p22.3	-0.314	-0.025
692	RP11-209O16	3	38244.3	38407.9	INHOUSE_SEQ	p22.2	-0.018	-0.242
693	RP11-268J19	3	39851.6	40017.5	TILE_C	p22.1	-0.119	-0.02
694	RP11-299L23	3	41879.2	42079.5	BEP	p22.1	-0.082	0.05
695	RP11-1043F09	3	42218.2	42218.5	STS_OUR	p22.1	-0.251	-0.223
696	RP11-1050E16	3	42218.2	42218.5	STS_OUR	p22.1	-0.243	-0.054
697	RP11-1050E17	3	42218.2	42218.5	STS_OUR	p22.1	-0.059	-0.016
698	RP11-1050I04	3	42218.2	42218.5	STS_OUR	p22.1	0.009	-0.047
699	RP11-241P03	3	42393.9	42394.2	STS_OUR	p22.1	0.037	-0.238
700	RP11-119L2	3	42430.7	42596.9	BEP	p22.1	-0.042	-0.426
701	RP11-219I21	3	42434.5	42629.2	TILE_C	p22.1	-0.025	-0.386
702	RP11-002G06	3	43403	43403.3	STS_OUR	p22.1	-0.054	0.078
703	RP11-24L15	3	43499.7	43663.9	BEP	p22.1	0.042	-0.161
704	RP11-189H19	3	44567.4	44737.9	TILE_C	p21.32	-0.09	-0.345
705	RP11-1034I13	3	44587.9	44588.5	STS_OUR	p21.32	-0.056	-0.158
706	RP11-348P10	3	44675.1	44740	TILE_C	p21.31	0.014	-0.306
707	RP11-111P21	3	45315.4	45498	TILE_C	p21.31	0.016	-0.347
708	RP11-425J9	3	46857.9	47052.6	TILE_C	p21.31	0.064	-0.427
709	RP11-1010N14	3	48150.1	48247.5	INHOUSE_SEQ	p21.31	-0.177	-0.214
710	RP11-804H8	3	50533.7	50726	TILE_C	p21.31	-0.684	-0.378
711	RP11-865O5	3	52571.6	52772.1	INHOUSE_SEQ	p21.1	-0.389	-0.341
712	RP11-122D19	3	54007.4	54188.4	TILE_C	p21.1	-0.662	-0.488
713	RP11-124O02	3	54454.5	54454.8	STS_OUR	p14.3	-0.603	-0.233
714	RP11-1017N04	3	54627.3	54627.6	STS_OUR	p14.3	-1.294	-0.245
715	RP11-189K09	3	54670.7	54671	STS_OUR	p14.3	-0.725	-0.346
716	RP11-1020F12	3	54900.1	54900.5	STS_OUR	p14.3	-0.09	-0.16
717	RP11-39L1	3	55803.9	55970.7	INHOUSE_SEQ	p14.3	-0.032	-0.196
718	RP11-169G24	3	56171.5	56353	TILE_C	p14.3	0.071	-0.265
719	RP11-754F19	3	56798.7	56961.4	INHOUSE_SEQ	p14.3	-0.161	-0.242
720	RP11-120C02	3	57310.6	57310.9	STS_OUR	p14.3	-0.014	-0.127
721	RP11-229A12	3	57370.4	57534.9	TILE_C	p14.3	0.021	-0.255
722	RP11-1018A22	3	58418.9	58419.2	STS_OUR	p14.3	-0.102	-0.088
723	RP11-92A17	3	58507	58681.9	BEP	p14.2	0.073	-0.395
724	RP11-1017L15	3	59538.6	59538.9	STS_OUR	p14.2	0.015	-0.244
725	RP11-180G14	3	59538.6	59538.9	FISH	p14.2	0.094	-0.18
726	RP11-1001K04	3	60484.9	60485.2	STS_OUR	p14.2	-0.076	-0.085
727	RP11-94D19	3	60757	60927.1	TILE_C	p14.2	0.064	-0.296
728	RP11-1007P08	3	62459.9	62531.7	INHOUSE_SEQ	p14.2	0.147	-0.344
729	RP11-114P15	3	62473.2	62639.8	TILE_C	p14.2	-0.053	-0.412
730	RP11-108A08	3	63254.9	63396.3	INHOUSE_SEQ	p14.2	0.015	-0.357
731	RP11-50F24	3	63683.8	63862.2	TILE_C	p14.1	0.074	-0.287
732	RP11-129B22	3	64013.2	64184.4	TILE_C	p14.1	0.053	-0.432
733	RP11-179B9	3	64182.4	64329.9	BEP	p14.1	0.085	-0.556
734	RP11-14D22	3	64352.4	64528.9	TILE_C	p14.1	0.139	-0.326
735	RP11-146E16	3	67739.5	67813.1	TILE_C	p14.1	-0.109	-0.406
736	RP11-444P10	3	69701.8	69903	TILE_C	p13	0.066	-0.26
737	RP11-1008C04	3	70409.9	70410.2	STS_OUR	p13	-0.042	0.03
738	RP11-317G18	3	71357.4	71516.3	BEP	p13	0.264	-0.079
739	RP11-154H23	3	71623	71816.5	TILE_C	p13	-0.085	-0.248
740	RP11-522N9	3	72455.3	72633.5	TILE_C	p13	0.035	-0.35
741	RP11-781E19	3	74210.9	74236.1	TILE_C	p12.3	-0.025	-0.324
742	RP11-220O14	3	77584.8	77738.9	INHOUSE_SEQ	p12.3	0.017	0.029
743	RP11-447J13	3	86088.4	86268.6	INHOUSE_SEQ	p12.1	-0.108	0.108
744	RP11-8M11	3	86131.9	86253.8	FISH	p12.1	-0.008	0.149
745	RP11-424C9	3	87913.5	88078.9	FISH	p11.1	0.059	0.04
746	RP11-285J14	3	95525.7	95526.1	FISH	q11.2	-0.022	0.154
747	RP11-449F7	3	99049	99258.5	TILE_C	q12.1	0.039	0.12
748	RP11-1009O05	3	100219	100219	STS_OUR	q12.1	0.014	0.214
749	RP11-395D05	3	101136	101137	STS_OUR	q12.1	-0.053	0.116
750	RP11-114I8	3	101479	101632	TILE_C	q12.2	0.031	0
751	RP11-490H13	3	104644	104714	TILE_C	q13.11	-0.333	0.06
752	RP11-1008H10	3	109430	109632	BEP	q13.13	0.166	0.417
753	RP11-166C10	3	109969	110058	TILE_C	q13.13	0.002	-0.036
754	RP11-71D1	3	110884	111037	INHOUSE_SEQ	q13.13	0.004	-0.004
755	RP11-56C16	3	111584	111764	BEP	q13.13	-0.107	-0.143
756	RP11-745L2	3	112434	112600	INHOUSE_SEQ	q13.13	-0.178	-0.037
757	RP11-12P11	3	112746	112921	BEP	q13.2	0.057	-0.054
758	RP11-153K19	3	114199	114349	BEP	q13.2	0.07	0.053
759	RP11-5K13	3	114419	114597	BEP	q13.2	0.122	-0.016
760	RP11-24O5	3	114624	114803	TILE_C	q13.2	0.076	0.045
761	RP11-342J15	3	115679	115858	BLAT	q13.31	-0.085	0.121
762	RP11-214A05	3	116607	116607	STS_OUR	q13.31	0.108	-0.07
763	RP11-217N3	3	116875	116889	TILE_C	q13.31	-0.038	0.062
764	RP11-220G20	3	118631	118778	TILE_C	q13.32	-0.017	-0.038
765	RP11-373C21	3	118776	118831	TILE_C	q13.32	-0.002	0.037
766	RP11-165B13	3	119084	119158	TILE_C	q13.32	-0.091	0.122
767	RP11-233L03	3	119641	119641	STS_OUR	q13.32	0.016	0.124
768	RP11-169N13	3	120926	121092	TILE_C	q13.33	0.054	0.172
769	RP11-359H3	3	121651	121848	TILE_C	q13.33	-0.067	0.045
770	RP11-10G15	3	122544	122712	TILE_C	q13.33	-0.109	-0.008
771	RP11-396B8	3	123893	124044	TILE_UF	q21.1	0.13	-0.024
772	RP11-563J15	3	124159	124362	INHOUSE_SEQ	q21.1	0.019	-0.076
773	RP11-217P4	3	124526	124526	FISH	q21.1	-0.009	0.031
774	RP11-401B04	3	125195	125195	STS_OUR	q21.2	-0.097	-0.362
775	RP11-25L9	3	125401	125564	INHOUSE_SEQ	q21.2	-0.103	-0.013
776	RP11-95H16	3	125562	125717	TILE_C	q21.2	0.17	0.123
777	RP11-578N15	3	126726	126867	TILE_C	q21.2	0.011	-0.018
778	RP11-205A06	3	127427	127427	STS_OUR	q21.3	0.027	0.059
779	RP11-59J16	3	128599	128752	TILE_C	q21.3	-0.085	-0.113
780	RP11-525K18	3	129094	129282	TILE_C	q21.3	0.039	0.006
781	RP11-391E07	3	132664	132664	STS_OUR	q22.1	0.021	0.247
782	RP11-446K3	3	133084	133186	TILE_C	q22.1	0.056	0.002
783	RP11-883M5	3	134770	134854	TILE_C	q22.1	0.025	0.059
784	RP11-452H12	3	136105	136253	TILE_C	q22.2	0.094	-0.099
785	RP11-220J13	3	136800	136966	TILE_C	q22.2	0.012	-0.052
786	RP11-566E10	3	137390	137587	BLAT	q22.3	-0.094	-0.097
787	RP11-219P10	3	137606	137607	FISH	q22.3	0.069	-0.048
788	RP11-1005P08	3	138084	138084	STS_OUR	q22.3	0.062	0.24
789	RP11-630C21	3	138876	139034	INHOUSE_SEQ	q22.3	-0.061	-0.012
790	RP11-162J10	3	138895	139072	BEP	q22.3	-0.184	-0.027
791	RP11-548O1	3	140007	140188	INHOUSE_SEQ	q23	-0.036	-0.112
792	RP11-166D18	3	140943	141096	TILE_C	q23	0.069	-0.116
793	RP11-217F11	3	141484	141640	TILE_C_MULTI	q23	0.057	-0.039
794	RP11-1017D17	3	142751	142751	STS_OUR	q23	-0.007	0.217
795	RP11-1043E16	3	142751	142751	STS_OUR	q23	0.029	0.187
796	RP11-429A8	3	142882	143051	BLAT	q23	0.037	-0.075
797	RP11-160A13	3	144155	144312	BEP	q24	0.026	-0.057
798	RP11-1016P22	3	144198	144199	STS_OUR	q24	-0.207	0.28
799	RP11-260J24	3	145136	145290	BEP	q24	-0.072	0.125
800	RP11-1017G11	3	146062	146063	STS_OUR	q24	-0.037	0.146
801	RP11-72E23	3	146548	146689	TILE_C	q24	-0.004	0.078
802	RP11-394C03	3	146674	146674	STS_OUR	q24	-0.018	0.121
803	RP11-505J9	3	149845	150050	TILE_C	q24	-0.057	0.239
804	RP11-229G6	3	150290	150336	FISH	q25.1	0.001	0.083
805	RP11-63E16	3	151142	151313	INHOUSE_SEQ	q25.1	-0.024	0.115
806	RP11-145F16	3	151508	151679	TILE_C	q25.1	0.008	0.185
807	RP11-385G14	3	152255	152414	INHOUSE_SEQ	q25.1	-0.038	-0.026
808	RP11-1015K02	3	152272	152273	STS_OUR	q25.1	0.108	0.175
809	RP11-64F6	3	152414	152591	BEP	q25.1	0.136	0.161
810	RP11-65L11	3	152789	152948	BEP	q25.1	-0.103	-0.037
811	RP11-362A9	3	153502	153698	INHOUSE_SEQ	q25.2	0.006	0.071
812	RP11-80I14	3	153591	153736	FISH	q25.2	0.013	0.181
813	RP11-372M20	3	154726	154891	FISH	q25.2	0.092	-0.026
814	RP11-286N6	3	156874	156902	TILE_C	q25.31	0.041	-0.036
815	RP11-392A22	3	157905	158032	TILE_C	q25.31	0.095	0.022
816	RP11-79M21	3	159778	159869	TILE_C	q25.32	0.026	-0.036
817	RP11-1006M15	3	160982	161115	INHOUSE_SEQ	q25.33	-0.014	0.351
818	RP11-203L15	3	162045	162187	TILE_C	q26.1	0.021	0.025
819	RP11-1021K12	3	162063	162063	STS_OUR	q26.1	0.014	0.347
820	RP11-1045M11	3	162063	162063	STS_OUR	q26.1	-0.071	0.233
821	RP11-1045H21	3	163812	163812	STS_OUR	q26.1	0.014	0.066
822	RP11-198G24	3	165290	165465	TILE_C	q26.1	0.023	-0.014
823	RP11-478O19	3	166478	166654	INHOUSE_SEQ	q26.1	-0.232	0.063
824	RP11-190F16	3	167553	167745	INHOUSE_SEQ	q26.1	0.015	-0.022
825	RP11-264D07	3	168656	168657	STS_OUR	q26.1	0.037	-0.038
826	RP11-297J9	3	168938	169121	INHOUSE_SEQ	q26.1	-0.149	0.03
827	RP11-24L16	3	169693	169693	FISH	q26.2	-0.396	0.013
828	RP11-250A4	3	170313	170486	INHOUSE_SEQ	q26.2	-0.029	0.062
829	RP11-141C22	3	170367	170544	INHOUSE_SEQ	q26.2	-0.132	0.225
830	RP11-543D10	3	171444	171618	TILE_C	q26.2	-0.016	-0.26
831	RP11-151P12	3	171644	171797	BEP	q26.2	0.039	0.174
832	RP11-1050E20	3	171683	171842	INHOUSE_SEQ	q26.2	0.046	0.244
833	RP11-26K1	3	172363	172525	BLAT	q26.2	-0.049	0.12
834	RP11-163H6	3	173181	173348	INHOUSE_SEQ	q26.31	0.024	0.062
835	RP11-196F13	3	173680	173721	TILE_C	q26.31	0.055	0.069
836	RP11-172G05	3	174591	174591	STS_OUR	q26.31	0.134	0.114
837	RP11-148D23	3	174849	175020	BEP	q26.31	-0.132	0.162
838	RP11-292L5	3	176532	176725	TILE_C	q26.31	-0.08	0.138
839	RP11-114M01	3	178895	178895	STS_OUR	q26.32	0.075	-0.063
840	RP11-253H10	3	179103	179261	BLAT	q26.32	-0.008	0.075
841	RP11-118F4	3	180911	181073	FISH	q26.33	-0.038	-0.14
842	RP11-1056B05	3	180940	181197	INHOUSE_SEQ	q26.33	-0.249	0.072
843	RP11-510K16	3	181653	181856	INHOUSE_SEQ	q26.33	-0.008	0.062
844	RP11-275H4	3	182468	182622	INHOUSE_SEQ	q26.33	-0.579	0.012
845	RP11-259I19	3	183454	183637	INHOUSE_SEQ	q26.33	-0.063	0.049
846	RP11-12L14	3	185039	185040	INHOUSE_SEQ	q27.1	-0.471	-0.148
847	RP11-242B01	3	185424	185425	STS_OUR	q27.1	-0.799	-0.081
848	RP11-125E8	3	185459	185626	TILE_C	q27.1	0.069	-0.192
849	RP11-1047H07	3	185548	185699	INHOUSE_SEQ	q27.1	-0.101	0.147
850	RP11-1047I08	3	185548	185549	INHOUSE_SEQ	q27.1	-0.047	0.012
851	RP11-379C23	3	187368	187555	TILE_C	q27.3	-0.127	-0.054
852	RP11-567G11	3	188629	188695	TILE_C	q27.3	0.138	-0.053
853	RP11-358G06	3	189021	189148	INHOUSE_SEQ	q27.3	0.036	0.065
854	RP11-1044G24	3	189500	189500	STS_OUR	q28	-0.197	0.297
855	RP11-67E18	3	189919	190074	TILE_C	q28	-0.08	-0.085
856	RP11-115I8	3	190315	190451	TILE_C	q28	0.054	0.086
857	RP11-178K17	3	190561	190732	TILE_C	q28	0.03	-0.094
858	RP11-53D15	3	191083	191252	INHOUSE_SEQ	q28	0.007	-0.049
859	RP11-455C22	3	191341	191526	BEP	q28	-0.045	-0.05
860	RP11-54L09	3	191575	191575	STS_OUR	q28	-0.027	0.182
861	RP11-332P22	3	192009	192197	INHOUSE_SEQ	q28	-0.139	-0.153
862	RP11-608P9	3	192895	193092	INHOUSE_SEQ	q28	-0.074	-0.046
863	RP11-88M01	3	193160	193160	STS_OUR	q28	-0.104	0.18
864	RP11-56C4	3	193864	194024	INHOUSE_SEQ	q29	0.007	-0.028
865	RP11-326J2	3	195052	195115	TILE_C	q29	-0.063	-0.12
866	RP11-513G11	3	195373	195518	INHOUSE_SEQ	q29	-0.111	-0.003
867	RP11-480A16	3	197161	197318	TILE_C	q29	-0.137	-0.114
868	RP11-233N20	3	198393	198574	INHOUSE_SEQ	q29	-0.039	0.169
869	RP11-349C22	4	248.196	418.202	BEP	p16.3	0.068	0.054
870	RP11-310H1	4	656.253	855.379	TIGR_SEQ	p16.3	-0.063	-0.031
871	RP11-308K21	4	722.068	921.293	TIGR_SEQ	p16.3	-0.039	0.067
872	RP11-386I15	4	1357.91	1358.27	INHOUSE_SEQ	p16.3	-0.105	-0.045
873	RP11-291C17	4	1913.6	1913.79	STS_OUR	p16.3	-0.089	-0.017
874	RP11-431E17	4	1913.6	1913.79	STS_OUR	p16.3	0.055	-0.029
875	RP11-466A9	4	4469.06	4636.69	BEP	p16.2	-0.019	-0.01
876	RP11-432K8	4	6730.29	6911.61	INHOUSE_SEQ	p16.1	-0.042	0.035
877	RP11-410C22	4	6762.24	6762.53	STS_OUR	p16.1	0.015	0.04
878	RP11-303M5	4	6994.71	7181.21	BEP	p16.1	-0.007	-0.119
879	RP11-303C10	4	7179.19	7179.5	STS_OUR	p16.1	0.092	0.058
880	RP11-301J10	4	8587.71	8588.02	INHOUSE_SEQ	p16.1	-0.212	-0.169
881	RP11-306I8	4	8640.28	8829.34	INHOUSE_SEQ	p16.1	-0.072	-0.149
882	RP11-312I17	4	12893.8	12894.2	INHOUSE_SEQ	p15.33	0.065	0.111
883	RP11-469O6	4	15409.7	15410.1	STS_OUR	p15.33	-0.045	0.053
884	RP11-539C15	4	15409.7	15410.1	STS_OUR	p15.33	-0.002	0.085
885	RP11-442P12	4	15412.6	15619.3	TILE_C	p15.32	0.069	0.115
886	RP11-565F20	4	15473.5	15617.8	BLAT	p15.32	0.046	0.196
887	RP11-446O20	4	15518.4	15526.7	STS_OUR	p15.32	0.033	0.173
888	RP11-547K18	4	15518.4	15526.7	STS_OUR	p15.32	0.035	0.2
889	RP11-557H5	4	20132	20305.9	BEP	p15.31	-0.107	0.091
890	RP11-559F10	4	21064.8	21241.6	BLAT	p15.31	0.048	0.166
891	RP11-499K16	4	21196.3	21196.4	STS_OUR	p15.31	-0.03	0.171
892	RP11-558C17	4	21196.3	21196.4	STS_OUR	p15.31	-0.073	0.101
893	RP11-570J21	4	21979.7	22148.6	BEP	p15.31	0.02	0.127
894	RP11-481K22	4	21979.8	22148.6	BEP	p15.31	0.027	0.15
895	RP11-496C24	4	24281.2	24471.3	BEP	p15.2	0.009	0.183
896	RP11-497E20	4	24373	24373.2	STS_OUR	p15.2	0.1	0.183
897	RP11-497F18	4	24373	24373.2	STS_OUR	p15.2	0.027	0.174
898	RP11-419K15	4	25039.2	25186.4	BEP	p15.2	0.089	0.162
899	RP11-405D14	4	25096.2	25096.4	STS_OUR	p15.2	0.04	0.046
900	RP11-421A17	4	25470.4	25475.5	TILE_C	p15.2	0.07	0.126
901	RP11-508J3	4	26611.9	26782.6	BEP	p15.2	0.071	0.225
902	RP11-488C8	4	26633	26802.6	BEP	p15.2	0.047	0.164
903	RP11-495L18	4	30264.7	30424.9	TILE_C	p15.1	-0.02	0.145
904	RP11-303C12	4	37078.6	37251.9	INHOUSE_SEQ	p14	0.123	0.194
905	RP11-306D6	4	37334.3	37498.9	BEP	p14	0.167	0.185
906	RP11-314P13	4	37344.3	37499.3	BEP	p14	0.061	0.163
907	RP11-522A5	4	37506.4	37688.6	BEP	p14	0.002	0.003
908	RP11-488J13	4	39151.5	39260.4	TILE_C	p14	0.024	0.143
909	RP11-509H1	4	39260.4	39452	BEP	p14	0.031	0.01
910	RP11-315F5	4	40163.7	40323.6	BEP	p14	-0.052	0.075
911	RP11-300N15	4	40172.7	40360.3	BEP	p14	-0.161	0.043
912	RP11-409G19	4	40203.6	40357.1	BEP	p14	-0.05	0.087
913	RP11-411O14	4	40281.3	40281.5	STS_OUR	p14	0.003	0.055
914	RP11-397A2	4	41012.3	41188	BEP	p14	0.004	0.248
915	RP11-313B18	4	41111	41111.2	STS_OUR	p14	0.087	0.205
916	RP11-313B20	4	41111	41111.2	STS_OUR	p14	0.16	0.153
917	RP11-331M18	4	41261.6	41475.9	TILE_C	p13	0.07	0.199
918	RP11-316N3	4	41471	41471.3	STS_OUR	p13	0.043	0.163
919	RP11-388I1	4	41502.4	41657	BEP	p13	0.032	0.143
920	RP11-414K6	4	41540.3	41540.7	STS_OUR	p13	0.086	0.117
921	RP11-323G14	4	41680.2	41841.4	BEP	p13	0.013	0.069
922	RP11-425J11	4	47106.9	47296.4	TIGR_SEQ	p12	-0.036	0.248
923	RP11-410K1	4	47435.5	47435.8	STS_OUR	p12	-0.029	0.173
924	RP11-417O9	4	47435.5	47435.8	STS_OUR	p12	-0.039	0.145
925	RP11-331G14	4	48301.5	48487.5	BEP	p12	0.046	0.016
926	RP11-317G22	4	48735.5	48919.7	TILE_C	p12	0.112	0.187
927	RP11-420L16	4	52716.2	52868.2	BEP	q11	0.061	0.154
928	RP11-515O9	4	52804.1	52804.2	STS_OUR	q11	0.077	0.186
929	RP11-290G1	4	53151.7	53321.6	BEP	q12	0.176	0.182
930	RP11-481M13	4	54015.7	54187.5	BEP	q12	0.121	0.085
931	RP11-293F15	4	54068.7	54233.5	BEP	q12	0.097	0.056
932	RP11-310P3	4	54203.2	54203.3	STS_OUR	q12	0.043	0.095
933	RP11-334C2	4	54203.2	54203.3	STS_OUR	q12	0.141	0.138
934	RP11-512P14	4	54601.6	54792.8	BEP	q12	0.01	0.072
935	RP11-335F14	4	55691.9	55868.7	BEP	q12	0.017	0.173
936	RP11-427O4	4	55814.8	55815.1	STS_OUR	q12	0.032	0.214
937	RP11-504F11	4	55943.7	56145	BEP	q12	0.024	0.087
938	RP11-421J2	4	55964.2	56144.9	BEP	q12	0.06	0.063
939	RP11-317B15	4	56074.4	56250.9	BEP	q12	0.093	0.067
940	RP11-300G17	4	56088.7	56274.8	BEP	q12	0.068	0.115
941	RP11-510G2	4	56139.7	56139.8	STS_OUR	q12	0.111	0.128
942	RP11-521J23	4	56478.4	56655.4	BEP	q12	0.103	0.173
943	RP11-505O3	4	62349.8	62501.6	BEP	q13.1	-0.048	0.297
944	RP11-306D22	4	62739.8	62890	TIGR_SEQ	q13.1	-0.029	0.325
945	RP11-304O19	4	65044.3	65197.8	BEP	q13.1	0.003	0.473
946	RP11-387J11	4	66069.2	66251	BEP	q13.1	-0.084	0.342
947	RP11-388C20	4	66069.3	66225.4	TIGR_SEQ	q13.1	-0.069	0.394
948	RP11-301E21	4	68008	68174.9	BEP	q13.2	0.094	0.299
949	RP11-486P6	4	71874.7	72050	BEP	q13.3	0.129	0.416
950	RP11-544I21	4	71999.3	72187.9	BEP	q13.3	0.032	0.21
951	RP11-294B21	4	75064.3	75218.3	BEP	q13.3	0.035	0.369
952	RP11-367M19	4	75079.1	75146.8	TILE_C	q13.3	0.02	0.371
953	RP11-312D7	4	75211.6	75211.9	STS_OUR	q13.3	0.098	0.339
954	RP11-299J2	4	77417.9	77621.8	BEP	q21.1	0.161	0.317
955	RP11-302I16	4	77592	77592.4	STS_OUR	q21.1	0.088	0.459
956	RP11-352D12	4	77592	77592.4	STS_OUR	q21.1	0.147	0.386
957	RP11-395D16	4	77592	77592.4	STS_OUR	q21.1	0.14	0.351
958	RP11-416D10	4	77592	77592.4	STS_OUR	q21.1	0.184	0.424
959	RP11-289G6	4	78345.1	78481	BEP	q21.1	0.073	0.267
960	RP11-342H19	4	78445.4	78445.5	STS_OUR	q21.1	0.063	0.421
961	RP11-294N17	4	78842.1	79007.1	BEP	q21.1	0.042	0.36
962	RP11-408E3	4	79774.2	79959.8	BEP	q21.21	0.029	0.391
963	RP11-326K4	4	79800	79967	TIGR_SEQ	q21.21	0.022	0.349
964	RP11-326O2	4	82625.8	82822.3	BEP	q21.21	0.079	0.34
965	RP11-330O3	4	82704.7	82705	STS_OUR	q21.21	0.119	0.289
966	RP11-403K20	4	82704.7	82705	STS_OUR	q21.21	0.089	0.269
967	RP11-502M9	4	83713.8	83882.8	BEP	q21.22	0.198	0.405
968	RP11-458G13	4	87213.9	87384.9	BEP	q21.23	0.1	0.229
969	RP11-464H18	4	88690.8	88869.6	TILE_UF	q22.1	0.131	0.421
970	RP11-434C15	4	88695.2	88875.6	BEP	q22.1	0.101	0.378
971	RP11-489J7	4	88756.4	88756.6	STS_OUR	q22.1	0.035	0.409
972	RP11-443D13	4	90474.2	90656.9	INHOUSE_SEQ	q22.1	0.019	0.553
973	RP11-463L2	4	90912.2	91074.7	BEP	q22.1	0.043	0.338
974	RP11-468M1	4	90961.8	90962.3	STS_OUR	q22.1	0.002	0.334
975	RP11-477H2	4	90961.8	90962.3	STS_OUR	q22.1	0.075	0.361
976	RP11-478A8	4	90961.8	90962.3	STS_OUR	q22.1	0.032	0.326
977	RP11-434K14	4	95386.6	95580.7	BEP	q22.3	0.04	0.338
978	RP11-452H7	4	95515.5	95515.8	STS_OUR	q22.3	0.166	0.383
979	RP11-570N13	4	95678.5	95678.9	TIGR_SEQ	q22.3	0.18	0.392
980	RP11-573E14	4	96293.4	96466	BEP	q22.3	0.149	0.349
981	RP11-539C22	4	96440.9	96441.2	STS_OUR	q22.3	0.142	0.421
982	RP11-569O17	4	96440.9	96441.2	STS_OUR	q22.3	0.165	0.411
983	RP11-470F2	4	99629.4	99817.2	BEP	q23	0.171	0.386
984	RP11-469F4	4	99817	100026	INHOUSE_SEQ	q23	0.169	0.329
985	RP11-329E2	4	106557	106734	BEP	q24	0.132	0.307
986	RP11-334G24	4	106725	106725	STS_OUR	q24	0.158	0.343
987	RP11-336G6	4	106725	106725	STS_OUR	q24	0.082	0.216
988	RP11-525F1	4	106825	107018	BEP	q24	0.131	0.445
989	RP11-501L16	4	109756	109959	BEP	q25	0.074	0.354
990	RP11-359F1	4	111764	111953	INHOUSE_SEQ	q25	0.169	0.375
991	RP11-380D23	4	111799	112000	TILE_C	q25	0.126	0.316
992	RP11-512P7	4	115071	115250	BEP	q26	0.12	0.505
993	RP11-507I23	4	115181	115181	STS_OUR	q26	0.179	0.273
994	RP11-430F23	4	118836	118998	BEP	q26	0.048	0.325
995	RP11-335K15	4	118855	118855	STS_OUR	q26	0.051	0.257
996	RP11-417M14	4	118855	118855	STS_OUR	q26	0.092	0.292
997	RP11-425C10	4	118855	118855	STS_OUR	q26	0.079	0.313
998	RP11-313F19	4	119419	119602	BEP	q26	0.013	0.338
999	RP11-402D8	4	119434	119616	TIGR_SEQ	q26	0.14	0.372
1000	RP11-522G3	4	121335	121336	INHOUSE_SEQ	q27	0.195	0.417
1001	RP11-508I20	4	121377	121529	BLAT	q27	0.179	0.354
1002	RP11-508O22	4	121377	121529	TIGR_SEQ	q27	0.132	0.363
1003	RP11-429E21	4	122854	123046	BEP	q27	0.011	0.361
1004	RP11-322O18	4	122947	122947	STS_OUR	q27	0.202	0.358
1005	RP11-323P21	4	122947	122947	STS_OUR	q27	0.08	0.299
1006	RP11-421E12	4	122947	122947	STS_OUR	q27	0.063	0.448
1007	RP11-389B11	4	124569	124795	BEP	q28.1	0.081	0.366
1008	RP11-574G3	4	126667	126857	BEP	q28.1	0.13	0.487
1009	RP11-548C17	4	126770	126771	STS_OUR	q28.1	0.065	0.371
1010	RP11-561O19	4	126770	126771	STS_OUR	q28.1	0.148	0.424
1011	RP11-324A20	4	129038	129208	BLAT	q28.1	0.16	0.361
1012	RP11-398H1	4	129132	129189	TILE_C	q28.1	0.118	0.301
1013	RP11-493F16	4	129506	129681	BEP	q28.2	0.178	0.362
1014	RP11-447I16	4	130063	130243	BEP	q28.2	0.247	0.311
1015	RP11-489M9	4	130207	130361	BEP	q28.2	0.051	0.081
1016	RP11-331J13	4	134476	134476	STS_OUR	q28.3	0.05	0.435
1017	RP11-336L3	4	139310	139502	BEP	q28.3	0.042	0.419
1018	RP11-375P10	4	140155	140170	TILE_C	q31.1	0.064	0.416
1019	RP11-295E22	4	140718	140718	INHOUSE_SEQ	q31.1	0.139	0.355
1020	RP11-291M3	4	140749	140913	BEP	q31.1	0.12	0.364
1021	RP11-418P18	4	141239	141417	BEP	q31.1	0.192	0.478
1022	RP11-392B6	4	141372	141474	TILE_C	q31.1	0.163	0.419
1023	RP11-390N13	4	141404	141404	STS_OUR	q31.1	0.131	0.309
1024	RP11-432P15	4	143541	143700	BEP	q31.21	0.053	0.457
1025	RP11-413M22	4	143597	143736	TILE_C	q31.21	0.189	0.473
1026	RP11-315C10	4	143697	143861	BEP	q31.21	0.102	0.516
1027	RP11-424A19	4	144933	145119	BEP	q31.21	0.062	0.512
1028	RP11-387E6	4	146913	147070	BEP	q31.21	0.114	0.39
1029	RP11-292M9	4	146987	147070	TILE_C	q31.21	0.096	0.42
1030	RP11-294H8	4	147038	147039	STS_OUR	q31.21	0.154	0.379
1031	RP11-315D2	4	147038	147039	STS_OUR	q31.21	0.109	0.399
1032	RP11-399L13	4	147038	147039	STS_OUR	q31.21	0.243	0.372
1033	RP11-416F3	4	147038	147039	STS_OUR	q31.21	0.149	0.426
1034	RP11-483B24	4	149165	149357	BEP	q31.23	0.047	0.388
1035	RP11-503H23	4	153101	153290	BEP	q31.3	0.156	0.505
1036	RP11-503L23	4	153101	153188	TILE_C	q31.3	0.214	0.442
1037	RP11-308I16	4	155655	155867	BEP	q31.3	-0.003	0.436
1038	RP11-331F13	4	155691	155879	TIGR_SEQ	q31.3	0.028	0.513
1039	RP11-314C18	4	155857	156043	BEP	q31.3	0.044	0.495
1040	RP11-425N5	4	155864	155865	STS_OUR	q31.3	0.116	0.453
1041	RP11-524B5	4	160434	160583	TILE_C	q32.1	0.059	0.518
1042	RP11-527H16	4	160645	160822	BEP	q32.1	0.007	0.149
1043	RP11-299O17	4	162494	162685	BEP	q32.2	-0.006	0.417
1044	RP11-488P8	4	164797	164957	BEP	q32.2	-0.059	0.491
1045	RP11-493C20	4	164826	164969	TILE_C	q32.2	0.062	0.399
1046	RP11-482J10	4	164950	164950	STS_OUR	q32.2	0.064	0.432
1047	RP11-512C14	4	169618	169783	BEP	q32.3	0.097	0.451
1048	RP11-517K22	4	169653	169653	STS_OUR	q32.3	0.197	0.48
1049	RP11-511O14	4	175758	175935	BEP	q34.1	0.084	0.291
1050	RP11-495K8	4	183626	183817	TIGR_SEQ	q34.3	0.71	0.458
1051	RP11-498D11	4	183724	183869	TIGR_SEQ	q34.3	0.911	0.533
1052	RP11-386B13	4	186295	186446	TILE_C	q35.1	0.072	0.21
1053	RP11-331E2	4	186311	186521	BEP	q35.1	0.09	0.274
1054	RP11-325F5	4	186443	186444	STS_OUR	q35.1	0.07	0.357
1055	RP11-475B8	5	367.564	368.083	STS_OUR	p15.33	0.108	0.302
1056	RP11-317B20	5	468.923	648.955	BEP	p15.33	-0.01	0.07
1057	RP11-300J8	5	491.105	491.384	STS_OUR	p15.33	-0.077	-0.087
1058	RP11-305P11	5	505.112	673.152	INHOUSE_SEQ	p15.33	-0.05	0.049
1059	RP11-310P5	5	517.591	680.011	TILE_C	p15.33	-0.032	-0.023
1060	RP11-487N22	5	517.591	680.005	BEP	p15.33	0.002	-0.057
1061	RP11-305O11	5	520.207	520.366	STS_OUR	p15.33	-0.057	-0.105
1062	RP11-391K2	5	520.207	520.366	STS_OUR	p15.33	-0.177	-0.045
1063	RP11-471P21	5	1103.6	1103.82	STS_OUR	p15.33	0.075	0.017
1064	RP11-443F18	5	1869.01	1869.13	STS_OUR	p15.33	-0.065	0.009
1065	RP11-289J13	5	2692.01	2848.77	BEP	p15.33	-0.003	0.554
1066	RP11-437F24	5	3704.19	3704.36	STS_OUR	p15.33	-0.082	-0.031
1067	RP11-453M10	5	3704.19	3704.36	STS_OUR	p15.33	-0.118	-0.069
1068	RP11-526L19	5	3704.19	3704.36	STS_OUR	p15.33	-0.096	-0.091
1069	RP11-567L14	5	3704.19	3704.36	STS_OUR	p15.33	0	-0.041
1070	RP11-534E21	5	4943.44	5106.74	BLAT	p15.32	-0.149	0.026
1071	RP11-572D16	5	6515.86	6716.32	BEP	p15.31	-0.144	0.004
1072	RP11-442F3	5	6545.42	6545.6	STS_OUR	p15.31	-0.01	-0.032
1073	RP11-408G13	5	8949.42	9141.8	BEP	p15.31	-0.029	0.103
1074	RP11-317L15	5	9020.56	9164.86	BEP	p15.31	0.005	0.146
1075	RP11-332O23	5	9088.89	9089.05	STS_OUR	p15.31	-0.102	0.083
1076	RP11-535C10	5	9480.22	9682.92	BLAT	p15.31	-0.061	0.084
1077	RP11-516N6	5	10435.6	10609.6	BEP	p15.2	-0.023	0.039
1078	RP11-562G5	5	10490.7	10491	STS_OUR	p15.2	0.036	0.01
1079	RP11-562P24	5	10490.7	10491	STS_OUR	p15.2	0.058	-0.013
1080	RP11-481M12	5	14308	14504.5	BEP	p15.2	0.048	-0.03
1081	RP11-509B9	5	15663.7	15833.8	TILE_C	p15.1	-0.023	0.077
1082	RP11-543L4	5	15728	15911.2	BEP	p15.1	0.026	-0.017
1083	RP11-538E2	5	15810.3	15810.6	STS_OUR	p15.1	0.039	0.064
1084	RP11-297H22	5	16438.6	16601.2	BEP	p15.1	0.033	0.166
1085	RP11-411M10	5	16505.5	16505.6	STS_OUR	p15.1	0.003	0.129
1086	RP11-491O10	5	16718.6	16718.7	STS_OUR	p15.1	0.021	0.051
1087	RP11-491P10	5	16718.6	16718.7	STS_OUR	p15.1	0.1	0.156
1088	RP11-321E2	5	17417.7	17583.7	TILE_C	p15.1	-0.01	0.029
1089	RP11-419L11	5	19706.6	19883.4	BEP	p14.3	0.175	0.192
1090	RP11-332K4	5	19853.9	19854.3	STS_OUR	p14.3	0.05	0.225
1091	RP11-403O23	5	20595.6	20772.2	BEP	p14.3	0.004	0.017
1092	RP11-437P15	5	31871.6	32085.6	INHOUSE_SEQ	p13.3	-0.097	0.074
1093	RP11-518I2	5	31884.3	31884.7	INHOUSE_SEQ	p13.3	0.054	0.189
1094	RP11-422J14	5	32078.9	32239.2	INHOUSE_SEQ	p13.3	-0.042	-0.031
1095	RP11-509H22	5	33978.5	34166.7	BEP	p13.3	0.034	-0.013
1096	RP11-325L22	5	37120.9	37298.4	BEP	p13.2	0.144	0.115
1097	RP11-493D24	5	37732.1	37898.1	BEP	p13.2	0.107	-0.001
1098	RP11-493F24	5	37848.6	37848.9	STS_OUR	p13.2	0.164	0.222
1099	RP11-513I5	5	37848.6	37848.9	STS_OUR	p13.2	0.112	0.191
1100	RP11-305H14	5	39225.1	39422.4	BEP	p13.1	0.071	0.247
1101	RP11-339P2	5	39337.5	39512.5	TIGR_SEQ	p13.1	0.069	0.164
1102	RP11-402F19	5	39422.1	39422.2	STS_OUR	p13.1	-0.033	0.151
1103	RP11-311J12	5	40718.6	40902.2	TIGR_SEQ	p13.1	0.08	0.059
1104	RP11-413J1	5	40861.2	40861.3	STS_OUR	p13.1	0.122	-0.033
1105	RP11-507F11	5	41156.2	41353.1	BEP	p13.1	0.095	0.031
1106	RP11-495A2	5	41716.1	41918.7	TIGR_SEQ	p13.1	0.159	0.211
1107	RP11-515F7	5	41777.2	41971.5	BEP	p13.1	0.083	0.258
1108	RP11-316L24	5	41948.5	42111.6	BEP	p13.1	0.184	0.186
1109	RP11-451L18	5	43315.4	43493.1	BEP	p12	0.127	0.207
1110	RP11-317O24	5	50100.5	50293.5	TILE_C	q11.1	-0.007	0.207
1111	RP11-376M22	5	50177.1	50177.2	STS_OUR	q11.1	-0.021	0.292
1112	RP11-387C10	5	50177.1	50177.2	STS_OUR	q11.1	0.078	0.159
1113	RP11-400G10	5	50177.1	50177.2	STS_OUR	q11.1	-0.042	0.116
1114	RP11-408N2	5	50177.1	50177.2	STS_OUR	q11.1	-0.093	0.133
1115	RP11-541M5	5	53067.9	53224.7	TILE_UF	q11.2	0.04	0.186
1116	RP11-396H23	5	54592.4	54774.7	BEP	q11.2	-0.016	0.14
1117	RP11-342H5	5	55353.1	55552.6	BEP	q11.2	-0.124	0.02
1118	RP11-317C19	5	58879.2	59037.1	BEP	q12.1	0.045	0.193
1119	RP11-290A17	5	58882	59042.8	BEP	q12.1	0.016	0.185
1120	RP11-398C18	5	58971	58971.1	STS_OUR	q12.1	0.095	0.155
1121	RP11-407H23	5	58971	58971.1	STS_OUR	q12.1	0.101	0.135
1122	RP11-414D12	5	58971	58971.1	STS_OUR	q12.1	0.145	0.253
1123	RP11-412M9	5	59778.3	59920.8	BEP	q12.1	0.055	0.147
1124	RP11-429O8	5	59855.2	59855.5	STS_OUR	q12.1	0.087	0.194
1125	RP11-418L19	5	61720	61720.3	STS_OUR	q12.1	0.039	0.35
1126	RP11-450A10	5	61932.8	62103	BLAT	q12.1	0.042	0.147
1127	RP11-292B9	5	63602.3	63792	BEP	q12.3	0.072	0.109
1128	RP11-378A1	5	63628.6	63628.9	STS_OUR	q12.3	0.069	0.104
1129	RP11-416G14	5	63628.6	63628.9	STS_OUR	q12.3	0.133	0.023
1130	RP11-559O4	5	64918.9	64919.1	STS_OUR	q12.3	0.12	0.196
1131	RP11-558G3	5	65035.7	65036.1	STS_OUR	q12.3	-0.059	0.136
1132	RP11-496C22	5	65505.7	65672.6	BEP	q12.3	0.093	0.098
1133	RP11-314P11	5	67145.3	67322.9	BEP	q13.1	-0.304	0.053
1134	RP11-404L6	5	67428.6	67552	TILE_C	q13.1	0.105	0.191
1135	RP11-351B18	5	72108.3	72263.2	BEP	q13.2	0.039	0.123
1136	RP11-312C23	5	72108.3	72255.9	TIGR_SEQ	q13.2	0.153	0.107
1137	RP11-306A17	5	72145.1	72355.6	TIGR_SEQ	q13.2	0.18	0.105
1138	RP11-395C16	5	72242.7	72420.1	TIGR_SEQ	q13.2	0.085	0.065
1139	RP11-428C6	5	73114.8	73321.1	TILE_C	q13.2	0.019	0.093
1140	RP11-399M5	5	73126	73315	TILE_UF	q13.2	0.004	0.135
1141	RP11-318B10	5	76645.6	76845	BLAT	q13.3	0.064	0.072
1142	RP11-427P6	5	76758.2	76758.6	STS_OUR	q13.3	0.097	0.158
1143	RP11-317M13	5	78205.8	78407.8	BEP	q14.1	0.02	0.168
1144	RP11-395E17	5	78528.4	78716	BEP	q14.1	-0.104	0.058
1145	RP11-293A13	5	81057.8	81246	BEP	q14.1	0.08	0.142
1146	RP11-322H15	5	83396	83545.3	BEP	q14.3	0.008	0.062
1147	RP11-330N20	5	102469	102677	TIGR_SEQ	q21.1	0.104	0.19
1148	RP11-296P3	5	108473	108658	BEP	q21.3	-0.085	0.019
1149	RP11-412C13	5	110842	110978	BEP	q22.1	-0.429	0.145
1150	RP11-315M22	5	114218	114391	BEP	q22.3	0.078	-0.078
1151	RP11-358B17	5	115657	115657	STS_OUR	q23.1	-0.035	0.072
1152	RP11-464H3	5	116614	116773	BEP	q23.1	0.096	0.126
1153	RP11-499F20	5	122372	122372	STS_OUR	q23.2	-0.17	0.125
1154	RP11-497L10	5	131612	131804	BEP	q23.3	-0.051	0.111
1155	RP11-295E18	5	131612	131804	TIGR_SEQ	q23.3	-0.063	0.138
1156	RP11-403A4	5	132077	132237	BEP	q23.3	-0.036	0.018
1157	RP11-561K11	5	134308	134308	STS_OUR	q31.1	-0.358	-0.178
1158	RP11-522J16	5	136211	136418	INHOUSE_SEQ	q31.1	-0.527	0.065
1159	RP11-512E3	5	136373	136374	INHOUSE_SEQ	q31.1	-0.245	0.019
1160	RP11-307M22	5	138298	138298	STS_OUR	q31.2	-0.186	-0.024
1161	RP11-424F21	5	138298	138298	STS_OUR	q31.2	-0.27	-0.045
1162	RP11-323J18	5	140643	140809	BEP	q31.3	0.006	-0.102
1163	RP11-304N3	5	141512	141688	BEP	q31.3	-0.003	-0.128
1164	RP11-386J16	5	141514	141514	STS_OUR	q31.3	-0.47	-0.158
1165	RP11-309I1	5	141914	142108	BEP	q31.3	-0.053	-0.069
1166	RP11-313M1	5	142032	142041	STS_OUR	q31.3	0.038	-0.062
1167	RP11-432D20	5	142032	142041	STS_OUR	q31.3	-0.059	0.004
1168	RP11-427K3	5	143822	144004	BEP	q32	0.087	-0.007
1169	RP11-316K15	5	143844	143844	STS_OUR	q32	0.013	0.152
1170	RP11-321K6	5	143844	143844	STS_OUR	q32	0.002	0.13
1171	RP11-327H13	5	143844	143844	STS_OUR	q32	0.008	0.103
1172	RP11-416G11	5	143844	143844	STS_OUR	q32	-0.153	-0.048
1173	RP11-413N3	5	144850	145018	BEP	q32	-0.088	0.023
1174	RP11-447H24	5	145474	145474	STS_OUR	q32	-0.133	-0.074
1175	RP11-491A14	5	145834	146033	BEP	q32	0.024	0.086
1176	RP11-511F22	5	147818	147889	TILE_C	q33.1	-0.118	0.155
1177	RP11-523P24	5	148549	148720	BEP	q33.1	-0.197	0.048
1178	RP11-485P10	5	148714	148714	STS_OUR	q33.1	0.119	0.014
1179	RP11-498L11	5	149346	149346	STS_OUR	q33.1	-0.17	0.002
1180	RP11-314P8	5	153647	153821	BEP	q33.2	-0.031	0.035
1181	RP11-386A14	5	153670	153670	STS_OUR	q33.2	-0.069	0.004
1182	RP11-394N2	5	153670	153670	STS_OUR	q33.2	-0.002	-0.131
1183	RP11-473G12	5	156763	156960	BEP	q33.3	-0.082	-0.038
1184	RP11-470O5	5	156834	156834	STS_OUR	q33.3	-0.12	0.007
1185	RP11-480N2	5	156834	156834	STS_OUR	q33.3	-0.092	-0.047
1186	RP11-455A15	5	156890	156929	TILE_C	q33.3	-0.123	-0.013
1187	RP11-355O8	5	159746	159930	BEP	q33.3	-0.21	0.012
1188	RP11-302C7	5	162654	162839	BEP	q34	-0.232	-0.111
1189	RP11-316M8	5	167482	167685	BEP	q34	0.019	0.083
1190	RP11-442K2	5	170231	170385	BEP	q35.1	-0.201	-0.013
1191	RP11-335E2	5	172790	172974	TILE_UF	q35.2	-0.156	0.348
1192	RP11-346N16	5	172851	173016	BEP	q35.2	-0.119	0.275
1193	RP11-317G4	5	172916	173132	BEP	q35.2	-0.377	0.23
1194	RP11-319K18	5	172917	173105	BEP	q35.2	-0.061	0.214
1195	RP11-434L24	5	175530	175726	BEP	q35.2	0.148	0.29
1196	RP11-538N21	5	175622	175622	STS_OUR	q35.2	0.111	0.107
1197	RP11-562J22	5	175622	175622	STS_OUR	q35.2	0.054	0.135
1198	RP11-568P11	5	175850	175850	STS_OUR	q35.2	0.044	-0.001
1199	RP11-449M20	5	176898	177094	BEP	q35.3	0.079	0.261
1200	RP11-563H3	5	176934	177010	TILE_C	q35.3	-0.015	0.111
1201	RP11-516K1	5	180143	180336	BEP	q35.3	-0.05	0.297
1202	RP11-516M1	5	180150	180150	STS_OUR	q35.3	0.132	0.42
1203	RP11-437D1	5	180332	180504	BEP	q35.3	0.067	0.112
1204	RP11-318F17	6	2334.83	2533.03	BEP	p25.2	-0.141	-0.291
1205	RP11-427N7	6	2782.47	2985.76	BEP	p25.2	-0.02	-0.276
1206	RP11-318A11	6	2962.12	2964.99	STS_OUR	p25.2	0.029	-0.344
1207	RP11-411K9	6	2962.12	2964.99	STS_OUR	p25.2	-0.079	-0.457
1208	RP11-334M4	6	3496.28	3691.78	BEP	p25.2	-0.013	-0.172
1209	RP11-320O19	6	3667.94	3668.05	STS_OUR	p25.2	-0.191	-0.311
1210	RP11-340M6	6	3667.94	3668.05	STS_OUR	p25.2	-0.037	-0.302
1211	RP11-402L9	6	3667.94	3668.05	STS_OUR	p25.2	-0.116	-0.25
1212	RP11-498B10	6	4339.64	4522.65	INHOUSE_SEQ	p25.1	0.21	-0.309
1213	RP11-450P20	6	4366.98	4566.58	BLAT	p25.1	0.061	-0.233
1214	RP11-575L18	6	4412.69	4412.82	STS_OUR	p25.1	0.001	-0.336
1215	RP11-324B14	6	5789.66	5942.28	BEP	p25.1	-0.032	-0.345
1216	RP11-394I9	6	5882.95	5883.39	STS_OUR	p25.1	-0.066	-0.293
1217	RP11-318G16	6	7302.66	7497.19	BEP	p24.3	0.096	-0.35
1218	RP11-361O13	6	7485.72	7485.92	STS_OUR	p24.3	0.035	-0.361
1219	RP11-364K13	6	7485.72	7485.92	STS_OUR	p24.3	0.006	-0.318
1220	RP11-375E15	6	11117.8	11305.4	BEP	p24.2	0.01	-0.211
1221	RP11-369I20	6	11171.6	11351.5	BEP	p24.2	-0.032	-0.201
1222	RP11-394F5	6	11235.2	11369.1	INHOUSE_SEQ	p24.2	-0.13	-0.356
1223	RP11-341J8	6	11246.6	11246.8	STS_OUR	p24.2	-0.026	-0.407
1224	RP11-405J12	6	14044.3	14184.8	BLAT	p23	0.035	-0.309
1225	RP11-527K3	6	14375.2	14559.8	BEP	p23	0.063	-0.322
1226	RP11-568O4	6	15696.5	15863.5	INHOUSE_SEQ	p22.3	-0.051	-0.25
1227	RP11-455N6	6	19933.7	20101.8	BEP	p22.3	-0.017	-0.356
1228	RP11-437H15	6	20566.8	20737.7	BEP	p22.3	-0.029	-0.24
1229	RP11-424H23	6	20951.1	21082.5	TILE_C	p22.3	0.151	-0.235
1230	RP11-457K17	6	21028.2	21183.6	BEP	p22.3	0.024	-0.245
1231	RP11-331A20	6	24070.7	24281.7	BLAT	p22.2	-0.117	-0.058
1232	RP11-301P15	6	24280	24280.2	STS_OUR	p22.2	0.009	-0.098
1233	RP11-317N13	6	25069.7	25230.1	BEP	p22.2	0.113	-0.337
1234	RP11-375J4	6	25117.5	25275.3	BEP	p22.2	0.037	-0.298
1235	RP11-341K10	6	25189.3	25189.4	STS_OUR	p22.2	0.029	-0.393
1236	RP11-420I18	6	25189.3	25189.4	STS_OUR	p22.2	-0.136	-0.333
1237	RP11-390F6	6	25321.2	25495.8	BEP	p22.2	0.611	-0.432
1238	RP11-391K6	6	26535.4	26745.2	BEP	p22.1	-0.227	-0.467
1239	RP11-318O14	6	26654.3	26654.7	STS_OUR	p22.1	-0.012	-0.485
1240	RP11-364E1	6	26654.3	26654.7	STS_OUR	p22.1	-0.006	-0.455
1241	RP11-391B1	6	28156.7	28364.1	BEP	p22.1	-0.016	-0.312
1242	RP11-487K7	6	30063.1	30261.6	BEP	p22.1	0.047	-0.295
1243	RP11-497A24	6	33315.6	33525.8	BEP	p21.32	-0.145	-0.318
1244	RP11-494G3	6	33620.7	33818.4	BEP	p21.31	0.086	-0.475
1245	RP11-295L16	6	35565.5	35743.5	BEP	p21.31	-0.225	-0.362
1246	RP11-335F21	6	35651.3	35651.4	STS_OUR	p21.31	-0.203	-0.37
1247	RP11-389O21	6	35651.3	35651.4	STS_OUR	p21.31	0.083	-0.174
1248	RP11-418N18	6	35651.3	35651.4	STS_OUR	p21.31	-0.03	-0.356
1249	RP11-407L18	6	36174.6	36347.5	BEP	p21.31	-0.257	-0.398
1250	RP11-397F15	6	36652.8	36865.4	TIGR_SEQ	p21.31	0.089	-0.48
1251	RP11-564J9	6	37040.4	37040.6	STS_OUR	p21.2	0.102	-0.233
1252	RP11-439P13	6	41047.1	41246.8	BEP	p21.1	0.264	-0.268
1253	RP11-557N10	6	41255.7	41472.1	BEP	p21.1	-0.445	-0.127
1254	RP11-410H9	6	41751.4	41890.4	BEP	p21.1	-0.142	-0.544
1255	RP11-298J23	6	41805.4	41912.1	TILE_C	p21.1	-0.129	-0.325
1256	RP11-431D9	6	41865.3	41865.5	STS_OUR	p21.1	-1.001	-0.331
1257	RP11-534B24	6	42940.9	43134.3	BEP	p21.1	0.007	-0.227
1258	RP11-531A5	6	43052.5	43052.7	STS_OUR	p21.1	0.016	-0.376
1259	RP11-410B13	6	43602.7	43760.3	BEP	p21.1	-0.084	-0.398
1260	RP11-478J13	6	46265	46468.6	BEP	p12.3	0.011	-0.336
1261	RP11-365K20	6	46296.5	46296.7	STS_OUR	p12.3	0.005	-0.315
1262	RP11-421N15	6	46296.5	46296.7	STS_OUR	p12.3	0.14	-0.279
1263	RP11-445J18	6	46296.5	46296.7	STS_OUR	p12.3	-0.055	-0.349
1264	RP11-497J16	6	46652.2	46811.4	BEP	p12.3	0.15	-0.16
1265	RP11-540J1	6	46728.9	46729.2	STS_OUR	p12.3	-0.182	-0.191
1266	RP11-442D24	6	49430.7	49596	BEP	p12.3	0.086	-0.176
1267	RP11-456H14	6	49461.5	49629	TILE_UF	p12.3	0.182	-0.183
1268	RP11-345N2	6	50751.1	50967.7	BEP	p12.3	-0.03	-0.3
1269	RP11-538L4	6	52582.5	52776.6	BEP	p12.2	0.11	-0.221
1270	RP11-550P18	6	52723.1	52723.3	STS_OUR	p12.2	0.063	-0.246
1271	RP11-571I23	6	52723.1	52723.3	STS_OUR	p12.2	0.16	-0.266
1272	RP11-464P23	6	52942.8	53115.5	BEP	p12.1	0.068	-0.387
1273	RP11-445L5	6	53495.9	53671.2	BEP	p12.1	0.121	-0.384
1274	RP11-512A10	6	53506.1	53506.2	STS_OUR	p12.1	0.176	-0.328
1275	RP11-565P1	6	55881.8	56037.3	BEP	p12.1	-0.032	-0.237
1276	RP11-509P19	6	56420.1	56420.5	TIGR_SEQ	p12.1	0.104	-0.318
1277	RP11-408H21	6	56431.7	56431.8	STS_OUR	p12.1	-0.198	-0.36
1278	RP11-485L10	6	56627.7	56809.7	BLAT	p12.1	-0.057	-0.237
1279	RP11-370G24	6	56636.7	56637.1	STS_OUR	p12.1	0.009	-0.293
1280	RP11-519E3	6	57004.8	57189.5	BEP	p12.1	-0.027	-0.39
1281	RP11-321I5	6	62272.4	62442	BEP	q11.1	-0.04	-0.234
1282	RP11-313O10	6	62348.1	62503.7	BLAT	q11.1	-0.164	-0.129
1283	RP11-561K13	6	64204.6	64402.2	BEP	q12	-0.282	-0.298
1284	RP11-555G21	6	64253.7	64424.6	TILE_UF_MULTI	q12	0.009	-0.226
1285	RP11-378A10	6	66692.8	66856.7	TILE_UF	q12	0.064	0.275
1286	RP11-560P12	6	69531.4	69720.5	BEP	q12	-0.537	-0.114
1287	RP11-567C14	6	73926.3	74064.2	BEP	q13	0.041	-0.357
1288	RP11-398K22	6	74012	74210	TILE_C	q13	-0.116	-0.173
1289	RP11-380C14	6	74323.3	74498.1	BEP	q13	-0.029	-0.252
1290	RP11-429B5	6	76019.4	76019.6	STS_OUR	q14.1	0.05	-0.258
1291	RP11-429G24	6	76019.4	76019.6	STS_OUR	q14.1	0.13	-0.261
1292	RP11-497D19	6	79086	79244.3	BEP	q14.1	-0.013	-0.099
1293	RP11-316P15	6	81083.1	81237.8	BEP	q14.1	0.039	-0.265
1294	RP11-425N11	6	81099.2	81286.6	BEP	q14.1	0.16	-0.256
1295	RP11-346C19	6	81111.8	81290	BEP	q14.1	0.105	-0.256
1296	RP11-339M23	6	90110.8	90266.7	BEP	q15	-0.001	-0.339
1297	RP11-377P1	6	90131.5	90131.6	STS_OUR	q15	0.007	-0.349
1298	RP11-421F17	6	90131.5	90131.6	STS_OUR	q15	0.012	-0.285
1299	RP11-431H19	6	90131.5	90131.6	STS_OUR	q15	0.007	-0.068
1300	RP11-388E3	6	90397.5	90397.9	STS_OUR	q15	-0.082	-0.394
1301	RP11-392J1	6	90397.5	90397.9	STS_OUR	q15	-0.022	-0.417
1302	RP11-397O13	6	90397.5	90397.9	STS_OUR	q15	0.037	-0.443
1303	RP11-417L2	6	90487.6	90487.8	STS_OUR	q15	-0.148	-0.06
1304	RP11-402C18	6	90997.2	90997.5	INHOUSE_SEQ	q15	-0.04	-0.39
1305	RP11-391C1	6	91235.2	91412.6	BEP	q15	0.008	-0.16
1306	RP11-574D9	6	96946	97131.4	BEP	q16.1	0.145	-0.15
1307	RP11-290C18	6	99919.8	100097	BEP	q16.2	0.077	-0.26
1308	RP11-290C19	6	99988.8	99989	STS_OUR	q16.2	0.074	-0.21
1309	RP11-403D20	6	99988.8	99989	STS_OUR	q16.2	0.145	-0.233
1310	RP11-291I19	6	100628	100803	BEP	q16.3	0.015	-0.216
1311	RP11-421D20	6	100691	100691	STS_OUR	q16.3	0.023	-0.266
1312	RP11-347H8	6	102119	102295	TILE_C_MULTI	q16.3	0.05	-0.207
1313	RP11-553A16	6	102274	102275	STS_OUR	q16.3	0.008	-0.222
1314	RP11-319P21	6	102274	102274	STS_OUR	q16.3	0.017	-0.263
1315	RP11-552G15	6	105839	105839	STS_OUR	q21	-0.01	-0.346
1316	RP11-522A1	6	108215	108275	TILE_C	q21	0.035	-0.309
1317	RP11-343E13	6	111852	112042	BEP	q21	-0.081	-0.517
1318	RP11-557P19	6	112517	112677	BEP	q21	0.088	-0.191
1319	RP11-403C9	6	112569	112754	BEP	q21	0.015	-0.372
1320	RP11-411H20	6	118943	119092	BLAT	q22.31	0.035	-0.305
1321	RP11-391M10	6	119021	119021	STS_OUR	q22.31	-0.022	-0.352
1322	RP11-402M5	6	119021	119021	STS_OUR	q22.31	-0.032	-0.273
1323	RP11-309E9	6	124947	125120	BEP	q22.31	-0.016	0.136
1324	RP11-510M14	6	125432	125620	BEP	q22.31	0.094	0.067
1325	RP11-295M22	6	125455	125455	STS_OUR	q22.31	0.08	0.106
1326	RP11-325C12	6	125455	125455	STS_OUR	q22.31	0.095	0.075
1327	RP11-553G17	6	125623	125796	BEP	q22.31	0.026	0.118
1328	RP11-488I7	6	125639	125639	STS_OUR	q22.31	0.086	-0.029
1329	RP11-503F18	6	125639	125639	STS_OUR	q22.31	0.128	0.055
1330	RP11-359L3	6	128565	128731	BEP	q22.33	-0.031	-0.218
1331	RP11-388E24	6	128573	128731	BEP	q22.33	-0.071	0.002
1332	RP11-331A11	6	128672	128672	STS_OUR	q22.33	-0.236	0.019
1333	RP11-362G3	6	128672	128672	STS_OUR	q22.33	0.008	-0.047
1334	RP11-357H9	6	130351	130511	BEP	q23.1	-0.026	-0.091
1335	RP11-421F5	6	130405	130459	TILE_C	q23.1	-0.082	-0.077
1336	RP11-337C14	6	130504	130504	STS_OUR	q23.1	-0.055	-0.017
1337	RP11-425J16	6	131155	131337	BEP	q23.1	0.043	-0.037
1338	RP11-553F18	6	131936	132117	BEP	q23.2	0.108	0.116
1339	RP11-469I16	6	131982	131983	STS_OUR	q23.2	0.065	0.011
1340	RP11-501O4	6	131982	131983	STS_OUR	q23.2	0.164	0.02
1341	RP11-529H17	6	136464	136645	BEP	q23.3	0.055	0.026
1342	RP11-409I11	6	136582	136734	BEP	q23.3	0.076	0.019
1343	RP11-289H15	6	136623	136623	STS_OUR	q23.3	-0.044	-0.2
1344	RP11-362I3	6	136623	136623	STS_OUR	q23.3	-0.052	-0.021
1345	RP11-327O9	6	138673	138844	BEP	q24.1	0.042	-0.062
1346	RP11-336L8	6	138785	138785	STS_OUR	q24.1	0.007	0.026
1347	RP11-357C7	6	138785	138785	STS_OUR	q24.1	-0.003	0.001
1348	RP11-362B11	6	138785	138785	STS_OUR	q24.1	-0.042	0.048
1349	RP11-400F12	6	138785	138785	STS_OUR	q24.1	-0.012	0.023
1350	RP11-403G18	6	138785	138785	STS_OUR	q24.1	-0.075	0.001
1351	RP11-390P2	6	139012	139137	TILE_C	q24.1	0.053	-0.013
1352	RP11-390P6	6	139156	139156	STS_OUR	q24.1	0.489	0.058
1353	RP11-447P6	6	139286	139286	STS_OUR	q24.1	-0.066	0.021
1354	RP11-433F11	6	139419	139613	BEP	q24.1	0.024	0.03
1355	RP11-503F9	6	139529	139692	BEP	q24.1	-0.1	-0.027
1356	RP11-378N8	6	143685	143891	BEP	q24.2	0.169	-0.064
1357	RP11-291K8	6	145104	145290	BEP	q24.2	-0.081	-0.076
1358	RP11-293N6	6	146855	147009	BEP	q24.3	-0.043	-0.036
1359	RP11-311J14	6	146918	146918	STS_OUR	q24.3	0.013	-0.013
1360	RP11-312K10	6	146918	146918	STS_OUR	q24.3	-0.011	-0.011
1361	RP11-312O10	6	146918	146918	STS_OUR	q24.3	0.087	-0.051
1362	RP11-343P11	6	146918	146918	STS_OUR	q24.3	0.062	0.021
1363	RP11-361F15	6	147701	147864	TILE_C	q24.3	0.005	-0.038
1364	RP11-449O12	6	147799	147982	BEP	q24.3	0.036	0.039
1365	RP11-434K8	6	147799	148002	BEP	q24.3	-0.001	0.098
1366	RP11-294L8	6	148781	148784	TILE_C	q24.3	-0.282	0.063
1367	RP11-476E13	6	151510	151696	BEP	q25.1	-0.056	-0.051
1368	RP11-302L3	6	157336	157514	BEP	q25.3	0.081	-0.036
1369	RP11-349D4	6	157367	157367	STS_OUR	q25.3	0.19	0.013
1370	RP11-391D17	6	157367	157367	STS_OUR	q25.3	-0.087	0.003
1371	RP11-330C14	6	158724	158900	BEP	q25.3	0.208	0.004
1372	RP11-507C10	6	159028	159244	TILE_C	q25.3	0.126	-0.012
1373	RP11-388P20	6	159157	159157	STS_OUR	q25.3	0.081	0.064
1374	RP11-357E7	6	160137	160285	BEP	q25.3	-0.122	0.074
1375	RP11-555O8	6	164787	164935	INHOUSE_SEQ	q27	0.164	-0.051
1376	RP11-461A9	6	168048	168229	BEP	q27	-0.113	-0.077
1377	RP11-388H24	6	169056	169256	BEP	q27	-0.058	-0.009
1378	RP11-369A5	6	169213	169393	BEP	q27	0.115	-0.095
1379	RP11-417A5	6	169234	169409	BEP	q27	0.143	-0.091
1380	RP11-310O14	6	169251	169251	STS_OUR	q27	0.117	-0.106
1381	RP11-387C7	6	169251	169251	STS_OUR	q27	0.042	-0.068
1382	RP11-420D4	6	169251	169251	STS_OUR	q27	0.022	-0.168
1383	RP11-538K14	6	169251	169251	STS_OUR	q27	0.046	-0.019
1384	RP11-552A22	6	169599	169782	BEP	q27	0	-0.009
1385	RP11-375F20	6	170248	170416	BLAT	q27	-0.233	-0.211
1386	RP11-90P13	7	119.395	298.664	TILE_C	p22.3	-0.29	0.399
1387	CTC-329F6	7	2001.48	2175.59	BLAT	p22.3	-0.133	0.547
1388	RP11-96L18	7	2632.6	2788.65	BEP	p22.2	0.026	0.413
1389	GS1-191O15	7	2748.76	2875.46	BLAT_MULTI	p22.2	-0.022	0.268
1390	RP11-234N20	7	2871.15	2871.47	FISH	p22.2	-0.099	0.353
1391	RP11-191P07	7	2995.5	2995.82	STS_OUR	p22.2	-0.402	0.47
1392	CTB-146A2	7	4310.88	4407.24	BLAT_MULTI	p22.1	-0.057	0.01
1393	GS1-42C19	7	5721.72	5854.89	BLAT	p22.1	0.026	0.289
1394	RP11-2K20	7	5893.82	6040.68	INHOUSE_SEQ	p22.1	0.073	0.521
1395	GS1-54J22	7	7009.91	7161.02	BLAT	p21.3	0.046	0.429
1396	GS1-183H7	7	8614.5	8685.68	BLAT	p21.3	-0.103	0.487
1397	GS1-124N22	7	9742.7	9816.37	BLAT	p21.3	-0.162	0.675
1398	GS1-103O8	7	13571.5	13622.8	BLAT	p21.2	0.127	0.406
1399	RP11-14K1	7	15040.9	15045.7	FISH	p21.2	0.114	0.597
1400	GS1-110E22	7	15461	15612.5	BLAT	p21.2	-0.121	0.528
1401	GS1-165K6	7	16875.4	17059.5	BLAT	p21.1	-0.113	0.63
1402	RP11-123E05	7	17355.5	17355.9	STS_OUR	p21.1	0.019	0.807
1403	RP11-1048I06	7	17370.3	17370.7	STS_OUR	p21.1	0.073	0.392
1404	RP11-173P09	7	17370.3	17370.7	STS_OUR	p21.1	0.039	0.642
1405	RP11-70K03	7	18162.1	18162.3	STS_OUR	p21.1	0.086	0.739
1406	RP11-51L23	7	18504	18679.7	BEP	p21.1	0.007	0.685
1407	CTB-168O22	7	18513.8	18660	BLAT	p21.1	0.085	0.245
1408	RP11-1055N07	7	18975.3	18975.7	STS_OUR	p21.1	0.078	0.476
1409	RP11-1019N05	7	19148.7	19149.1	STS_OUR	p21.1	-0.356	0.443
1410	RP11-71F18	7	19213	19387.3	TILE_C	p21.1	0.051	0.461
1411	RP11-49N21	7	19755.9	19756.3	FISH	p21.1	-0.431	0.101
1412	RP11-1008M05	7	19991	19991.3	STS_OUR	p21.1	0.122	0.584
1413	CTB-1D14	7	20617.7	20618.1	FISH	p15.3	-0.061	0.305
1414	RP11-243C06	7	22544.4	22544.8	STS_OUR	p15.3	0.139	0.472
1415	RP11-160L16	7	22573.5	22737.3	BEP	p15.3	0.091	0.364
1416	RP11-1054C04	7	24190.5	24190.9	STS_OUR	p15.3	0.029	0.495
1417	CTB-148D3	7	24408.2	24515.1	BLAT	p15.3	-0.176	0.595
1418	RP11-1002K14	7	25362.5	25362.8	STS_OUR	p15.2	-0.007	0.718
1419	RP11-66O14	7	25902.8	26068.5	BLAT	p15.2	0.126	0.443
1420	GS1-213H12	7	26202	26381.9	BLAT	p15.2	0.024	0.475
1421	RP11-26E06	7	27108.6	27108.7	STS_OUR	p15.2	0.08	0.658
1422	RP11-1047F18	7	27143.2	27143.6	STS_OUR	p15.2	-0.1	0.511
1423	CTB-23D20	7	27681.6	27681.8	FISH	p15.2	-0.163	0.504
1424	RP11-17H7	7	27945.1	28115.2	BEP	p15.1	-0.182	0.724
1425	RP11-1055L01	7	27970.9	27971.3	STS_OUR	p15.1	0.05	0.501
1426	RP11-34N11	7	29311	29460.1	BEP	p15.1	0.065	0.256
1427	CTB-111H21	7	29760.9	29761.1	FISH	p15.1	-0.077	0.509
1428	RP11-242I04	7	30180.9	30181.2	STS_OUR	p15.1	0.131	0.336
1429	RP11-7E21	7	30180.9	30181.2	FISH	p15.1	0.109	0.683
1430	RP11-391A04	7	30309.5	30309.7	STS_OUR	p14.3	0.225	0.239
1431	RP11-54N19	7	30573.5	30598.2	FISH	p14.3	0.065	0.507
1432	RP11-17C13	7	30597.8	30598.2	FISH	p14.3	0.048	0.532
1433	RP11-1066A19	7	30721.7	30722.1	STS_OUR	p14.3	-0.119	0.444
1434	GS1-124K10	7	31515.9	31714.4	BLAT	p14.3	-0.112	0.464
1435	RP11-450H7	7	31566.9	31743.4	TILE_C	p14.3	0.165	0.315
1436	RP11-93J06	7	31846.8	31847.1	STS_OUR	p14.3	-0.031	0.539
1437	RP11-95N10	7	32542.8	32718	BLAT	p14.3	0.019	0.495
1438	GS1-174H8	7	32965.5	33083	BLAT	p14.3	0.054	0.521
1439	RP11-128O03	7	33418.1	33418.5	STS_OUR	p14.3	-0.061	0.604
1440	RP11-1001I18	7	33723.7	33723.9	STS_OUR	p14.3	0.102	0.721
1441	GS1-24B21	7	34634.8	34731	BLAT	p14.3	0	0.379
1442	RP11-115G23	7	34986.5	35140.1	BEP	p14.2	0.007	0.553
1443	RP11-178P02	7	35151.7	35151.8	STS_OUR	p14.2	-0.027	0.583
1444	RP11-138E20	7	36363.2	36363.6	FISH	p14.2	0.184	0.502
1445	RP11-87M15	7	36536.8	36537.3	FISH	p14.2	0.09	0.702
1446	RP11-75O22	7	36992.7	37179.8	BEP	p14.1	0.015	0.637
1447	GS1-100A6	7	37743.5	37940.7	BLAT	p14.1	-0.108	0.47
1448	RP11-115G01	7	38673.4	38673.7	STS_OUR	p14.1	0.044	1.006
1449	RP11-1017N07	7	38963	38963.3	STS_OUR	p14.1	-0.008	0.695
1450	RP11-64I2	7	39302.8	39420.6	TILE_C	p14.1	0.089	0.466
1451	RP11-112L04	7	39383	39383.6	STS_OUR	p14.1	0.133	0.469
1452	RP11-125N16	7	39479.6	39636.9	BEP	p14.1	0.029	0.222
1453	GS1-85G10	7	39879.2	39988.5	BLAT	p14.1	-0.148	-0.045
1454	RP11-373L21	7	39887.1	40034	TILE_UF	p14.1	0.023	-0.031
1455	RP11-1041D03	7	40489.5	40489.8	STS_OUR	p14.1	-0.072	0.291
1456	RP11-3L22	7	40625.2	40778.7	BEP	p14.1	0.006	0.576
1457	CTC-520A9	7	40747.1	40902.8	BLAT	p14.1	-0.053	0.296
1458	RP11-15M23	7	40896.7	40897	FISH	p14.1	-0.069	0.561
1459	RP11-70D20	7	41198.1	41198.4	FISH	p14.1	-0.055	0.324
1460	RP11-1017O23	7	41517.3	41517.6	STS_OUR	p14.1	0.163	0.613
1461	RP11-1012K18	7	41736.2	41736.5	STS_OUR	p14.1	-0.054	0.665
1462	RP11-100C21	7	42454.3	42614	TILE_C	p14.1	0.033	0.473
1463	RP11-141P12	7	42860.7	43024.7	BEP	p14.1	-0.081	0.432
1464	CTC-232O9	7	42984.3	43133.1	BLAT	p14.1	-0.181	0.375
1465	RP11-112B07	7	44243.3	44243.6	STS_OUR	p13	0.071	0.865
1466	GS1-8A1	7	44280.6	44376.3	BLAT	p13	0.083	0.21
1467	RP11-52M17	7	44401.8	44426.2	TILE_C	p13	0.13	0.421
1468	RP11-1050D07	7	44493.2	44493.6	STS_OUR	p13	0.129	-0.102
1469	RP11-126K07	7	45889.2	45889.6	STS_OUR	p13	0.094	0.075
1470	GS1-220D8	7	45998.3	46083.5	BLAT	p13	0.051	-0.018
1471	RP11-146C01	7	46909.1	46909.4	STS_OUR	p13	0.083	0.104
1472	RP11-1019H03	7	46909.1	46909.2	STS_OUR	p13	0.078	-0.014
1473	RP11-271O10	7	47050.3	47211	BLAT	p12.3	0.053	0.135
1474	RP11-11D14	7	47375.7	47453.9	FISH	p12.3	-0.034	-0.071
1475	GS1-207I13	7	47416.7	47483.1	BLAT	p12.3	0.024	-0.144
1476	RP11-123F04	7	47849.7	47850	INHOUSE_SEQ	p12.3	0.074	-0.049
1477	RP11-137P13	7	48394.5	48536	BEP	p12.3	0.035	0.011
1478	RP11-431A5	7	49660.1	49848.3	BEP	p12.2	-0.065	-0.034
1479	GS1-202O8	7	49805.8	49873.1	BLAT	p12.2	-0.474	-0.085
1480	RP11-15L23	7	50757.2	50939	BEP	p12.1	0.01	-0.039
1481	RP11-1016N08	7	50912.2	50912.6	STS_OUR	p12.1	0.019	0.005
1482	RP11-97H06	7	51644.1	51644.4	STS_OUR	p12.1	-0.295	-0.082
1483	GS1-32L15	7	52061.3	52202.6	BLAT	p12.1	-0.024	-0.085
1484	GS1-6E1	7	53398.8	53530.4	BLAT	p12.1	-0.147	0.048
1485	RP11-1013E24	7	54412.7	54413	STS_OUR	p11.2	0.164	-0.016
1486	RP11-81B20	7	54741.2	54905.3	BLAT	p11.2	-0.109	-0.123
1487	RP11-14K11	7	54903.4	54903.7	FISH	p11.2	-0.072	-0.135
1488	RP11-97P11	7	55238.3	55382	FISH	p11.2	-0.05	0.067
1489	RP11-34J24	7	55274.1	55403.6	FISH	p11.2	0.038	-0.049
1490	RP11-29K01	7	55275.3	55275.4	STS_OUR	p11.2	0.057	0.023
1491	RP11-251I15	7	55299.7	55476.9	BLAT	p11.2	0.036	-0.01
1492	RP11-126O12	7	55312.5	55312.9	FISH	p11.2	0.168	0.512
1493	RP11-15K19	7	55782.5	55901.5	TILE_C	p11.2	-0.055	-0.112
1494	RP11-250C21	7	55905.6	55905.9	STS_OUR	p11.2	0.063	0.063
1495	GS1-75C20	7	55999.4	55999.5	FISH	p11.2	-0.101	-0.069
1496	RP11-290G21	7	56133.4	56252.1	TIGR_SEQ	p11.2	-0.002	0.062
1497	RP11-338G19	7	56274.2	56441.4	BEP	p11.2	-0.062	-0.039
1498	RP11-67O05	7	56738.8	56739.3	STS_OUR	p11.2	0.006	-0.167
1499	RP11-114G11	7	57152.9	57331	TILE_C	p11.2	0.064	-0.01
1500	RP11-45N18	7	61822	61984	BEP	q11.21	-0.097	0.079
1501	GS216H24	7	62233.7	62384.5	INHOUSE_SEQ	q11.21	-0.136	-0.085
1502	RP11-403B15	7	62547.7	62734.5	BLAT	q11.21	0.099	-0.081
1503	RP11-90O18	7	63578.4	63591.4	FISH	q11.21	0.119	-0.206
1504	RP11-1012E10	7	64838.7	64839	STS_OUR	q11.21	0.011	0.164
1505	RP11-1013G10	7	64838.7	64839	STS_OUR	q11.21	0.16	0.041
1506	RP11-1013H10	7	64838.7	64839	STS_OUR	q11.21	0.246	-0.198
1507	CTC-247K5	7	65037.4	65195.8	BLAT	q11.21	-0.054	-0.025
1508	CTB-88A9	7	65816.3	65916	BLAT	q11.21	-0.088	-0.056
1509	RP11-214K14	7	65867.5	65867.7	FISH	q11.21	-0.044	-0.26
1510	GS1-208J7	7	66465.8	66552.2	BLAT	q11.22	-0.103	-0.124
1511	CTC-325E15	7	67483.1	67661.7	BLAT	q11.22	0.014	0.002
1512	RP11-227E04	7	67640.5	67640.9	STS_OUR	q11.22	-0.013	-0.213
1513	RP11-114E12	7	67843.7	68014.9	BEP	q11.22	0.122	0.042
1514	RP11-1021O09	7	67884.5	67884.8	STS_OUR	q11.22	0.06	-0.153
1515	RP11-1015B20	7	68509.9	68510.2	STS_OUR	q11.22	0.024	-0.004
1516	RP11-1017A19	7	68509.9	68510.2	STS_OUR	q11.22	-0.053	-0.015
1517	RP11-170H15	7	68659.5	68813	BEP	q11.22	-0.02	0.046
1518	RP11-1066M04	7	68796.2	68796.5	STS_OUR	q11.22	0.044	-0.081
1519	RP11-1005G07	7	68835.9	68836.4	STS_OUR	q11.22	0.034	0.019
1520	RP11-232F14	7	68840.7	68841	FISH	q11.22	0.185	0.082
1521	RP11-96O16	7	69021.7	69203.9	BEP	q11.22	-0.044	0.087
1522	RP11-1005B24	7	69203.6	69203.9	STS_OUR	q11.22	0.128	0.02
1523	GS1-35C5	7	69537.6	69694.1	BLAT	q11.22	-0.282	-0.154
1524	RP11-1008A06	7	69577.3	69577.7	STS_OUR	q11.22	-0.002	-0.134
1525	RP11-82A15	7	69645.5	69645.9	STS_OUR	q11.22	-0.038	-0.127
1526	RP11-471N21	7	70986.8	71182.6	BEP	q11.22	0.052	-0.124
1527	RP11-193J17	7	71178.4	71178.7	FISH	q11.22	-0.08	-0.157
1528	GS1-240H2	7	71218.1	71356.6	BLAT	q11.22	-0.225	-0.099
1529	RP11-35P20	7	71464.8	71637.7	BEP	q11.22	0.007	0.108
1530	RP11-50D02	7	71598.7	71599	STS_OUR	q11.22	0.056	0.11
1531	RP11-78P11	7	71712.8	71713.2	FISH	q11.23	0.073	-0.259
1532	RG203H3	7	71804.4	71804.8	INHOUSE_SEQ	q11.23	-0.049	0.025
1533	RP11-1008H17	7	72223.5	72223.8	STS_OUR	q11.23	0.025	-0.129
1534	CTB-51J22	7	72854.9	72953.1	TILE_C	q11.23	0	-0.051
1535	RP11-137E08	7	73431.5	73431.7	STS_OUR	q11.23	-0.004	-0.251
1536	RP11-1020I08	7	75022.5	75022.9	STS_OUR	q11.23	0.194	-0.158
1537	RP11-611E03	7	75396.9	75479.8	INHOUSE_SEQ	q11.23	0.102	-0.189
1538	RP11-1001L05	7	77318.5	77318.7	STS_OUR	q21.11	0.049	-0.03
1539	RP11-35H04	7	77318.5	77318.7	STS_OUR	q21.11	-0.006	-0.132
1540	RP11-60N02	7	77730.1	77730.4	STS_OUR	q21.11	-0.01	0.018
1541	GS1-17A10	7	77747.2	77843.2	BLAT	q21.11	-0.042	-0.019
1542	GS1-27F18	7	79519.2	79598.6	BLAT	q21.11	0.08	0.014
1543	RP11-228F05	7	79532.3	79532.4	STS_OUR	q21.11	0.221	0.118
1544	RP11-90K10	7	79850.5	80011.7	BEP	q21.11	0.112	0.147
1545	RP11-1010I19	7	80243.5	80243.9	STS_OUR	q21.11	0.102	-0.041
1546	RP11-115O03	7	80243.5	80243.9	STS_OUR	q21.11	-0.01	0.131
1547	GS1-53N21	7	81530.7	81649.9	BLAT	q21.11	-0.162	0.072
1548	RP11-1020M16	7	81755.7	81756	STS_OUR	q21.11	0.083	0.008
1549	RP11-126A20	7	82641.7	82808.3	BEP	q21.11	-0.045	0.142
1550	GS1-35M23	7	83496.6	83624.8	BLAT	q21.11	0.029	0.008
1551	RP11-1051K20	7	83717.7	83923.5	INHOUSE_SEQ	q21.11	0.153	0.031
1552	RP11-22M18	7	84188.4	84356.3	BEP	q21.11	-0.039	0.124
1553	GS1-207P11	7	85893.7	86002.4	BLAT	q21.12	-0.108	0.45
1554	RP11-46O13	7	88022.3	88200.2	BEP	q21.13	0.004	0.111
1555	CTB-141D22	7	89991.3	90099.1	BLAT	q21.13	0.037	-0.007
1556	CTC-332K22	7	92116.6	92249.3	INHOUSE_SEQ	q21.2	0.031	-0.036
1557	CTB-79L9	7	92243.9	92244.2	FISH	q21.2	-0.033	-0.003
1558	RP11-126B08	7	92450.8	92451.2	STS_OUR	q21.3	0.179	-0.007
1559	RP11-49N15	7	92507.5	92656.8	BEP	q21.3	0.001	0.03
1560	RP11-1041E14	7	93159.9	93160.3	STS_OUR	q21.3	0.084	0.006
1561	CTB-192P6	7	93681.2	93681.5	FISH	q21.3	-0.017	0.03
1562	RP11-1010P09	7	94075.6	94253.5	INHOUSE_SEQ	q21.3	0.122	-0.005
1563	RP11-127F03	7	94767.3	94767.6	STS_OUR	q21.3	0.062	-0.057
1564	RP11-32C15	7	95259.7	95260.1	FISH	q21.3	-0.021	-0.034
1565	RP11-190J02	7	95394.4	95394.8	STS_OUR	q21.3	-0.06	-0.01
1566	RP11-1006P05	7	96030.4	96030.7	STS_OUR	q21.3	0.129	-0.02
1567	CTC-224F8	7	96630.7	96873	BLAT	q21.3	0.016	0.058
1568	CTC-322M7	7	97535.2	97722.8	BLAT	q22.1	0	-0.211
1569	RP11-10D8	7	98067.8	98216.7	BEP	q22.1	-0.073	-0.246
1570	RP11-522F06	7	98888.9	98889.3	STS_OUR	q22.1	0.109	0.026
1571	RP11-388A10	7	98913.3	98913.6	STS_OUR	q22.1	0.18	0.034
1572	RP11-101E09	7	99442.9	99443.2	STS_OUR	q22.1	0.078	-0.05
1573	CTB-140E3	7	100290	100394	INHOUSE_SEQ	q22.1	0.07	-0.117
1574	RP11-213E22	7	100299	100493	INHOUSE_SEQ	q22.1	0.12	-0.149
1575	RP11-337G3	7	100691	100868	INHOUSE_SEQ	q22.1	-0.057	-0.143
1576	RP11-370F15	7	100691	100691	INHOUSE_SEQ	q22.1	-0.01	-0.174
1577	RP11-666G06	7	101342	101342	STS_OUR	q22.1	0.119	-0.185
1578	CTC-305I2	7	101433	101434	FISH	q22.1	-0.002	-0.094
1579	RP11-163M05	7	101456	101456	STS_OUR	q22.1	0.047	-0.234
1580	CTB-66D11	7	104161	104161	FISH	q22.3	-0.013	0.051
1581	RP11-72J24	7	104207	104360	BEP	q22.3	0.025	0.045
1582	RP11-395C11	7	105146	105146	STS_OUR	q22.3	0.197	-0.004
1583	RP11-61C18	7	106339	106493	BEP	q22.3	0.064	-0.017
1584	CTB-20D2	7	106629	106801	TILE_C	q22.3	0.05	0.016
1585	RP11-77E02	7	107277	107277	STS_OUR	q31.1	0.268	0.018
1586	RP11-86P18	7	107941	107941	FISH	q31.1	0.205	0.091
1587	CTB-22K14	7	108102	108274	TILE_C	q31.1	0.08	-0.052
1588	CTC-277H20	7	111129	111266	BLAT	q31.1	0.023	0.057
1589	RP11-92J13	7	111234	111401	BEP	q31.1	0.238	0.091
1590	RP11-12L9	7	111944	112104	BEP	q31.1	0.185	0.111
1591	RP11-78C11	7	114143	114262	TILE_C	q31.2	0.238	-0.017
1592	CTC-264L4	7	114332	114491	BLAT	q31.2	0.028	0.085
1593	RP11-110C11	7	115008	115158	BEP	q31.2	0.07	-0.048
1594	RP11-95L16	7	115397	115482	FISH	q31.2	0.061	0.007
1595	RP11-51M22	7	115435	115597	INHOUSE_SEQ	q31.2	0.064	0.011
1596	GS1-74E4	7	119361	119361	FISH	q31.31	-0.077	0.185
1597	RP11-140O21	7	120313	120486	INHOUSE_SEQ	q31.31	0.058	0.024
1598	RP11-112P04	7	121295	121296	STS_OUR	q31.32	-0.112	0.003
1599	RP11-48O1	7	121435	121554	FISH	q31.32	0.037	-0.028
1600	GS1-80F7	7	121882	122009	BLAT	q31.32	-0.024	0.037
1601	RP11-1050J14	7	122820	122820	STS_OUR	q31.32	0.057	0.016
1602	CTC-361L6	7	123962	124098	BLAT	q31.33	-0.02	0.111
1603	CTB-97E14	7	125481	125624	BLAT	q31.33	-0.123	0.085
1604	RP11-1012J22	7	125921	126007	INHOUSE_SEQ	q31.33	-0.004	-0.014
1605	RP11-9B4	7	125973	125974	FISH	q31.33	0.042	0.031
1606	RP11-1020L24	7	127209	127210	STS_OUR	q32.1	0.09	0.061
1607	RP11-9C22	7	127209	127210	FISH	q32.1	0.226	-0.018
1608	CTB-162H9	7	127307	127411	BLAT	q32.1	0.052	-0.037
1609	GS1-259E18	7	128721	128854	BLAT	q32.2	0.266	-0.102
1610	RP11-1050A04	7	128796	128797	STS_OUR	q32.2	0.237	0.029
1611	RP11-19G12	7	129088	129161	FISH	q32.2	0.074	0.012
1612	RP11-38P11	7	129558	129558	FISH	q32.2	0.132	-0.053
1613	RP11-2E11	7	129578	129746	TILE_C	q32.2	0.174	-0.126
1614	GS1-18N22	7	129821	129893	BLAT	q32.2	0.013	-0.103
1615	GS1-199H20	7	131301	131301	FISH	q32.3	-0.073	0.015
1616	RP11-1022A11	7	132097	132097	STS_OUR	q33	0.153	0.033
1617	RP11-118J20	7	132850	133018	FISH	q33	0.174	0.03
1618	GS1-9J21	7	133294	133425	BLAT	q33	-0.014	0.152
1619	RP11-1018P10	7	134028	134028	STS_OUR	q33	0.007	-0.047
1620	RP11-140I14	7	134547	134697	TILE_C	q33	0.191	-0.025
1621	RP11-69G14	7	135587	135602	TILE_C	q33	0.063	-0.314
1622	GS1-180P12	7	135938	136089	BLAT	q33	-0.009	0.126
1623	RP11-88K04	7	136158	136159	STS_OUR	q33	-0.03	0.041
1624	RP11-397F4	7	136355	136523	INHOUSE_SEQ	q33	-0.114	0.095
1625	RP11-22G20	7	136642	136808	BEP	q33	-0.098	0.033
1626	RP11-148F17	7	136670	136821	BEP	q33	-0.185	-0.045
1627	RP11-29B3	7	136957	137112	TILE_C	q33	0.012	-0.001
1628	CTB-162P22	7	137611	137708	BLAT	q34	0.003	-0.018
1629	RP11-137O04	7	137651	137651	STS_OUR	q34	0.202	-0.077
1630	RP11-269N18	7	137726	137901	TILE_C	q34	0.126	-0.064
1631	RP11-236O18	7	138333	138478	BLAT	q34	0.154	-0.043
1632	RP11-172L23	7	138515	138515	FISH	q34	-0.035	0.009
1633	GS1-119B11	7	139237	139238	FISH	q34	-0.033	-0.08
1634	CTC-574G24	7	141153	141298	BLAT	q34	-0.138	-0.186
1635	RP11-352D20	7	141983	142166	BEP	q34	-0.026	-0.07
1636	RP11-373O9	7	142791	142950	INHOUSE_SEQ	q34	-0.051	0.001
1637	RP11-411I20	7	142888	143047	INHOUSE_SEQ	q35	-0.343	-0.097
1638	CTC-219J18	7	143016	143233	BLAT	q35	0.021	0.059
1639	RP11-188A12	7	143040	143040	FISH	q35	-0.011	-0.137
1640	GS1-53I5	7	144760	144886	BLAT	q35	0.069	-0.055
1641	GS1-206P22	7	147489	147711	BLAT	q36.1	-0.007	-0.04
1642	RP11-106C06	7	147786	147786	STS_OUR	q36.1	0.057	-0.103
1643	CTB-156O8	7	149925	150019	BLAT	q36.1	0.079	0.17
1644	RP11-008H07	7	150394	150394	STS_OUR	q36.1	1.813	-0.155
1645	RP11-236I04	7	150577	150577	STS_OUR	q36.1	-0.019	-0.07
1646	RP11-244P13	7	150958	151119	BLAT	q36.1	-0.013	-0.067
1647	RP11-43L19	7	150974	151132	BEP	q36.1	-0.042	-0.153
1648	GS1-203O3	7	151005	151073	BLAT	q36.1	-0.041	0.04
1649	RP11-86L18	7	153471	153648	INHOUSE_SEQ	q36.2	0.006	-0.122
1650	GS1-121J16	7	154996	155058	BLAT	q36.3	0.015	-0.018
1651	RP11-351O24	7	156221	156221	INHOUSE_SEQ	q36.3	0.027	-0.071
1652	RP11-333G1	7	156452	156452	INHOUSE_SEQ	q36.3	-0.079	-0.04
1653	GS1-53F14	7	158047	158047	FISH	q36.3	0.129	-0.169
1654	RP11-412M23	8	345.059	511.086	BEP	p23.3	-0.658	0.094
1655	RP11-378D13	8	417.985	418.442	STS_OUR	p23.3	-1.151	0.024
1656	RP11-412I11	8	1790.66	1962.75	BEP	p23.3	-0.638	-0.044
1657	RP11-417A24	8	4559.87	4724.87	TILE_UF	p23.2	-1.02	0.05
1658	RP11-389F9	8	4579.42	4746.42	TIGR_SEQ	p23.2	-0.058	0.127
1659	RP11-323I24	8	5733.81	5898.54	INHOUSE_SEQ	p23.2	-0.82	-0.015
1660	RP11-499J9	8	7582.07	7764.55	INHOUSE_SEQ	p23.1	-0.886	-0.504
1661	RP11-455C13	8	9085.24	9255.59	BEP	p23.1	-0.437	0.077
1662	RP11-547F23	8	9097.56	9097.72	STS_OUR	p23.1	-0.596	0.049
1663	RP11-356F24	8	10323.5	10323.7	STS_OUR	p23.1	-0.979	-0.02
1664	RP11-297K5	8	11571	11740	BEP	p23.1	-0.899	0.044
1665	RP11-293J10	8	11682	11682.2	STS_OUR	p23.1	-0.936	0.032
1666	RP11-293K16	8	11682	11682.2	STS_OUR	p23.1	-0.294	0.479
1667	RP11-297O5	8	11682	11682.2	STS_OUR	p23.1	-0.537	0.019
1668	RP11-365M15	8	11682	11682.2	STS_OUR	p23.1	0.125	0.359
1669	RP11-395N1	8	11682	11682.2	STS_OUR	p23.1	-0.953	-0.03
1670	RP11-507P14	8	12815.1	13013.2	INHOUSE_SEQ	p22	-1.045	-0.073
1671	RP11-550F11	8	12836.4	13009.5	BEP	p22	-0.692	-0.044
1672	RP11-547A16	8	15546.8	15734.1	INHOUSE_SEQ	p22	-0.82	0.14
1673	RP11-343L2	8	17472.8	17650.7	BEP	p22	-0.692	-0.02
1674	RP11-326L2	8	17511.8	17685.8	TILE_C	p22	-0.508	0.003
1675	RP11-333L7	8	17573.8	17573.9	STS_OUR	p22	-0.507	-0.04
1676	RP11-339J23	8	17573.8	17573.9	STS_OUR	p22	-0.633	0.043
1677	RP11-426I23	8	17573.8	17573.9	STS_OUR	p22	-0.67	-0.045
1678	RP11-398K21	8	17798.3	17980.3	TIGR_SEQ	p22	-0.493	0.056
1679	RP11-392P23	8	17947.7	18112.6	BEP	p22	-0.636	0.016
1680	RP11-402K21	8	19740.3	19927.6	BEP	p21.3	-0.628	0.135
1681	RP11-353K12	8	20005.3	20179.3	TILE_C	p21.3	-1.367	-0.01
1682	RP11-413E9	8	20149.2	20149.4	STS_OUR	p21.3	-1.038	0.014
1683	RP11-507M15	8	21840.8	22021.3	BEP	p21.3	2.481	0.066
1684	RP11-515L12	8	22008.1	22008.3	STS_OUR	p21.3	2.33	0.044
1685	RP11-546G1	8	24719.6	24865.9	INHOUSE_SEQ	p21.2	-0.91	0.08
1686	RP11-501B1	8	27503.8	27688.9	BEP	p21.1	-0.732	-0.011
1687	RP11-545K24	8	27590.6	27775.3	INHOUSE_SEQ	p21.1	-0.622	0.036
1688	RP11-491A6	8	27646.8	27647	STS_OUR	p21.1	-0.554	0.141
1689	RP11-404O22	8	28443.5	28630.7	BEP	p21.1	-0.736	-0.013
1690	RP11-380C6	8	28443.5	28630.7	BEP	p21.1	-0.597	-0.06
1691	RP11-573F15	8	28449.8	28618.8	BEP	p21.1	-0.972	-0.061
1692	RP11-441H5	8	28486.9	28487	STS_OUR	p21.1	-0.239	-0.069
1693	RP11-452E21	8	28486.9	28487	STS_OUR	p21.1	-1.073	-0.044
1694	RP11-487C16	8	28486.9	28487	STS_OUR	p21.1	-0.617	-0.095
1695	RP11-536D8	8	28486.9	28487	STS_OUR	p21.1	-0.489	-0.116
1696	RP11-363A9	8	29112.7	29293.2	BEP	p12	-0.4	0.048
1697	RP11-355M10	8	29174.6	29174.7	STS_OUR	p12	-0.462	0.157
1698	RP11-465K4	8	30654.5	30816.3	TILE_C	p12	0.243	-0.065
1699	RP11-486I6	8	30716.3	30916.1	TIGR_SEQ	p12	-0.332	0.007
1700	RP11-539P2	8	33533.7	33710.7	BEP	p12	-0.554	-0.109
1701	RP11-439C4	8	36897	37054.2	BEP	p12	3.618	0.352
1702	RP11-554H9	8	36912.4	36912.8	STS_OUR	p12	3.571	0.265
1703	RP11-441J15	8	38036.8	38037	STS_OUR	p12	2.595	0.71
1704	RP11-498L13	8	38036.8	38037	STS_OUR	p12	2.405	0.841
1705	RP11-576M6	8	38810.4	38967.9	INHOUSE_SEQ	p11.23	2.234	-0.409
1706	RP11-551D4	8	38945.4	39094.3	TIGR_SEQ	p11.23	2.288	-0.342
1707	RP11-309M21	8	39035.8	39213.6	BEP	p11.23	2.241	-0.184
1708	RP11-360L9	8	41405.7	41625.3	TILE_C	p11.21	-0.171	0.701
1709	RP11-407N24	8	41411	41569.1	BEP	p11.21	-0.707	0.995
1710	RP11-411A18	8	41548.8	41751.4	BEP	p11.21	1.276	0.63
1711	RP11-327J4	8	41601.4	41601.6	STS_OUR	p11.21	0.882	0.666
1712	RP11-369O8	8	42114.9	42269.8	BEP	p11.21	-0.76	1.006
1713	RP11-372C6	8	42147.4	42147.9	STS_OUR	p11.21	-0.379	1.039
1714	RP11-392P18	8	42348.3	42348.5	STS_OUR	p11.21	-0.301	0.611
1715	RP11-327M15	8	48787.1	48963.2	BEP	q11.21	0.096	0.409
1716	RP11-350J24	8	48984.8	49157.8	BEP	q11.21	-0.576	0.121
1717	RP11-375J20	8	49839.4	50008.8	BLAT	q11.21	0.572	0.299
1718	RP11-297G2	8	49996.9	49997.1	STS_OUR	q11.21	0.408	0.369
1719	RP11-389N13	8	49996.9	49997.1	STS_OUR	q11.21	0.319	0.346
1720	RP11-408O17	8	49996.9	49997.1	STS_OUR	q11.21	0.413	0.271
1721	RP11-368P4	8	52827.5	53019.4	BEP	q11.23	0.171	0.148
1722	RP11-427F6	8	52849.3	53019.3	TIGR_SEQ	q11.23	0.261	0.181
1723	RP11-308L3	8	52939.5	53097.3	TIGR_SEQ	q11.23	0.364	0.304
1724	RP11-322J20	8	53010.3	53010.6	STS_OUR	q11.23	-0.133	-0.066
1725	RP11-468A12	8	53538.2	53700.2	BEP	q11.23	0.238	0.133
1726	RP11-505J22	8	53591.2	53779.1	INHOUSE_SEQ	q11.23	0.396	0.249
1727	RP11-461B21	8	53698.2	53698.3	STS_OUR	q11.23	0.394	0.309
1728	RP11-441J23	8	54759.1	54937.4	BEP	q11.23	0.411	0.167
1729	RP11-347N10	8	55187.3	55329.3	BEP	q11.23	0.39	0.161
1730	RP11-425E12	8	55222.6	55223	STS_OUR	q11.23	0.291	0.207
1731	RP11-569G18	8	56613.7	56613.8	STS_OUR	q12.1	0.316	0.255
1732	RP11-446E9	8	56945.4	57129.8	TILE_C	q12.1	0.191	0.182
1733	RP11-348C4	8	62696.9	62900.5	BLAT	q12.3	0.094	-0.009
1734	RP11-480E18	8	64106.6	64272	BEP	q12.3	0.305	0.057
1735	RP11-490N8	8	64136.5	64288.7	TIGR_SEQ	q12.3	0.159	0.078
1736	RP11-382B23	8	66548	66720.3	BEP	q13.1	0.428	0.201
1737	RP11-358H1	8	66666.8	66666.9	STS_OUR	q13.1	0.282	0.198
1738	RP11-405P5	8	67215.7	67358.6	BEP	q13.1	0.373	0.203
1739	RP11-409C17	8	67973.5	68120.9	BEP	q13.2	0.284	0.119
1740	RP11-566L6	8	69094.5	69270.8	BEP	q13.2	0.333	0.39
1741	RP11-352F8	8	70718	70875.3	BEP	q13.3	0.243	0.222
1742	RP11-392G13	8	70734.7	70734.8	STS_OUR	q13.3	0.31	0.323
1743	RP11-531A24	8	73980.1	74155.3	INHOUSE_SEQ	q21.11	0.341	0.207
1744	RP11-519A1	8	73983.8	74166.1	BEP	q21.11	0.338	0.218
1745	RP11-475F8	8	74306.9	74496.7	BEP	q21.11	0.403	0.271
1746	RP11-503K13	8	75247.5	75456.6	BEP	q21.11	0.287	0.209
1747	RP11-384N9	8	78022.9	78186.5	BEP	q21.13	0.319	0.174
1748	RP11-294F1	8	78043.6	78212.7	BEP	q21.13	0.302	0.192
1749	RP11-375C7	8	78043.8	78227.6	INHOUSE_SEQ	q21.13	0.302	0.223
1750	RP11-425G16	8	78057.9	78058.1	STS_OUR	q21.13	0.363	0.294
1751	RP11-494N8	8	79527.8	79718.3	TIGR_SEQ	q21.13	0.28	0.477
1752	RP11-498K1	8	79541	79731.8	BEP	q21.13	0.577	0.445
1753	RP11-542I22	8	79555.1	79742.2	INHOUSE_SEQ	q21.13	0.388	0.44
1754	RP11-553P17	8	79557.1	79735	TIGR_SEQ	q21.13	0.516	0.429
1755	RP11-549D13	8	79560.9	79731.8	TIGR_SEQ	q21.13	0.452	0.446
1756	RP11-565E11	8	81638.5	81824	BEP	q21.13	0.389	0.325
1757	RP11-486C6	8	81862.9	81863.3	INHOUSE_SEQ	q21.13	0.456	0.24
1758	RP11-571J10	8	82582	82747.3	BLAT	q21.13	0.42	0.311
1759	RP11-575N2	8	82693.7	82880.1	BEP	q21.13	0.47	0.361
1760	RP11-457A18	8	82838.1	82838.2	STS_OUR	q21.13	0.255	0.202
1761	RP11-304E2	8	84462.8	84660.3	INHOUSE_SEQ	q21.2	0.237	0.194
1762	RP11-510K1	8	85837.2	86029	BEP	q21.2	0.375	0.203
1763	RP11-546E14	8	85868	86041.4	BEP	q21.2	0.339	0.239
1764	RP11-488O1	8	85996.9	85997.1	STS_OUR	q21.2	0.383	0.243
1765	RP11-538A4	8	85996.9	85997.1	STS_OUR	q21.2	0.143	0.271
1766	RP11-317J10	8	86450.3	86631.4	TILE_C	q21.2	0.296	0.296
1767	RP11-517I23	8	87585	87585.1	STS_OUR	q21.3	-0.178	-0.245
1768	RP11-302P1	8	92893.3	93092.9	BEP	q21.3	0.344	0.228
1769	RP11-403O15	8	93036.4	93036.5	STS_OUR	q21.3	-0.022	-0.3
1770	RP11-483D2	8	94625.1	94828	BEP	q22.1	0.31	0.251
1771	RP11-467C8	8	94815.6	94815.8	STS_OUR	q22.1	0.346	0.223
1772	RP11-550K14	8	97296.7	97488.8	INHOUSE_SEQ	q22.1	0.511	0.305
1773	RP11-365G21	8	97538.9	97752.1	BEP	q22.1	0.388	0.239
1774	RP11-407I8	8	97561.1	97728.6	INHOUSE_SEQ	q22.1	0.355	0.261
1775	RP11-380H5	8	97692.6	97692.7	STS_OUR	q22.1	0.526	0.309
1776	RP11-357L7	8	110485	110712	INHOUSE_SEQ	q23.2	0.111	0.264
1777	RP11-401D19	8	110612	110781	BEP	q23.2	0.335	0.24
1778	RP11-1007F10	8	116806	116976	BEP	q23.3	0.132	-0.262
1779	RP11-307H20	8	117854	118047	INHOUSE_SEQ	q24.11	0.335	0.378
1780	RP11-367C15	8	117874	118047	INHOUSE_SEQ	q24.11	0.372	0.332
1781	RP11-302N12	8	123797	123978	INHOUSE_SEQ	q24.13	0.253	0.266
1782	RP11-302N13	8	123797	123978	INHOUSE_SEQ	q24.13	0.354	0.199
1783	RP11-384N3	8	123828	124011	INHOUSE_SEQ	q24.13	0.371	0.214
1784	RP11-324I17	8	123870	124039	INHOUSE_SEQ	q24.13	0.304	0.159
1785	RP11-300I14	8	125973	126156	TILE_C	q24.13	0.425	0.355
1786	RP11-475L4	8	127505	127662	INHOUSE_SEQ	q24.21	0.371	0.225
1787	RP11-435M5	8	127568	127759	BEP	q24.21	0.234	0.257
1788	RP11-573L1	8	127583	127747	INHOUSE_SEQ	q24.21	0.345	0.249
1789	RP11-480O15	8	127596	127766	INHOUSE_SEQ	q24.21	0.351	0.141
1790	RP11-485C3	8	127625	127802	INHOUSE_SEQ	q24.21	0.351	0.244
1791	RP11-503H2	8	127631	127799	INHOUSE_SEQ	q24.21	-0.041	0.009
1792	RP11-558H5	8	128043	128223	INHOUSE_SEQ	q24.21	0.461	0.18
1793	RP11-524D19	8	128065	128282	BEP	q24.21	0.407	0.297
1794	RP11-480P1	8	130255	130435	BEP	q24.21	0.553	0.503
1795	RP11-542E14	8	130296	130482	BEP	q24.21	0.555	0.28
1796	RP11-535E5	8	133062	133221	INHOUSE_SEQ	q24.22	0.46	0.283
1797	RP11-449N15	8	133097	133293	INHOUSE_SEQ	q24.22	0.555	0.305
1798	RP11-448N16	8	133126	133307	INHOUSE_SEQ	q24.22	0.611	0.292
1799	RP11-383L10	8	139181	139359	BEP	q24.23	0.462	0.164
1800	RP11-534I23	8	142097	142306	INHOUSE_SEQ	q24.3	0.226	0.033
1801	RP11-502G13	8	142118	142345	INHOUSE_SEQ	q24.3	0.386	0.112
1802	RP11-576M18	8	144573	144778	BEP	q24.3	0.104	0.01
1803	RP11-299M14	8	144922	145013	TILE_C	q24.3	0.328	0.012
1804	RP11-426K24	9	117.641	296.393	INHOUSE_SEQ	p24.3	0.117	0.106
1805	RP11-454I13	9	227.902	402.41	BEP	p24.3	0.006	-0.049
1806	RP11-393D13	9	236.835	427.748	BEP	p24.3	0.109	0.098
1807	RP11-453I1	9	442.109	615.154	BEP	p24.3	0.073	0.019
1808	RP11-342N10	9	601.034	789.416	TIGR_SEQ	p24.3	-0.062	0.045
1809	RP11-318K10	9	674.636	674.842	STS_OUR	p24.3	0.054	0.08
1810	RP11-531G8	9	4237.25	4437.04	TIGR_SEQ	p24.2	0.105	-0.02
1811	RP11-497H21	9	4248.47	4437.1	BEP	p24.2	0.073	0.159
1812	RP11-422I10	9	7740.07	7909.14	BLAT	p24.1	0.085	0.019
1813	RP11-353J5	9	7769.16	7953.66	BEP	p24.1	0.048	0.002
1814	RP11-323F8	9	8199.76	8351.97	INHOUSE_SEQ	p24.1	-0.029	0.056
1815	RP11-290M6	9	8228.46	8411.01	BEP	p24.1	0.047	0.083
1816	RP11-376O21	9	8242.69	8411.02	TILE_C	p24.1	0.042	-0.036
1817	RP11-323J8	9	8305.18	8305.3	STS_OUR	p24.1	-0.137	0.054
1818	RP11-361P16	9	8305.18	8305.3	STS_OUR	p24.1	0.012	-0.008
1819	RP11-333M12	9	10288.5	10462.7	BEP	p23	-0.011	0.106
1820	RP11-366F1	9	10344	10555	INHOUSE_SEQ	p23	-0.184	0.069
1821	RP11-308O9	9	14666	14849.4	BEP	p22.3	0.114	0.098
1822	RP11-557G11	9	14765.2	14944.1	BEP	p22.3	-0.014	0.06
1823	RP11-447F14	9	14835	14835.1	STS_OUR	p22.3	-0.011	0.018
1824	RP11-464M17	9	14835	14835.1	STS_OUR	p22.3	-0.008	0.079
1825	RP11-476C9	9	14842.7	14908	TILE_C	p22.3	0.025	0.039
1826	RP11-371N7	9	15119.1	15282	BEP	p22.3	-0.064	-0.081
1827	RP11-297A17	9	18017.6	18178.4	TILE_C	p22.2	-0.125	-0.111
1828	RP11-322J7	9	19030	19208.3	BEP	p22.1	0.114	0.003
1829	RP11-469A13	9	23032.9	23232	TIGR_SEQ	p21.3	-0.069	0.083
1830	RP11-510J5	9	23065.8	23234.4	TIGR_SEQ	p21.3	-0.043	0.044
1831	RP11-513H20	9	23152.9	23352.7	TIGR_SEQ	p21.3	0.07	0.05
1832	RP11-499B7	9	23169.6	23169.8	STS_OUR	p21.3	0	0.028
1833	RP11-491J7	9	27430.3	27597.5	BEP	p21.2	-0.069	0.059
1834	RP11-477N11	9	27803.9	27985.3	BEP	p21.2	0.137	0.11
1835	RP11-426M4	9	27938.6	27938.8	STS_OUR	p21.2	0.051	0.176
1836	RP11-492E22	9	30469.9	30641.8	BEP	p21.1	-0.04	0.084
1837	RP11-483A7	9	30548.8	30549	STS_OUR	p21.1	0.079	0.085
1838	RP11-559M15	9	30548.8	30549	STS_OUR	p21.1	-0.089	0.029
1839	RP11-381E15	9	32466.4	32642.2	BEP	p21.1	-0.047	-0.028
1840	RP11-452H10	9	32856.2	33054.1	BEP	p21.1	0.137	0.12
1841	RP11-562M8	9	32871.5	32992.1	TILE_C	p21.1	0.029	0.013
1842	RP11-485D24	9	32970.2	32970.3	STS_OUR	p21.1	0.01	0.004
1843	RP11-560J9	9	32970.2	32970.3	STS_OUR	p21.1	0.022	-0.013
1844	RP11-312I5	9	32970.8	33137.6	BEP	p21.1	0.142	0.03
1845	RP11-492D3	9	32970.8	33149.7	BEP	p21.1	-0.06	0.097
1846	RP11-523I4	9	34076.4	34076.5	STS_OUR	p13.3	-0.113	0.004
1847	RP11-499G9	9	34129	34159.6	TILE_C	p13.3	0.005	-0.107
1848	RP11-519D18	9	34130	34310.8	BEP	p13.3	0.038	0.008
1849	RP11-525N24	9	34915.1	35100.9	BEP	p13.3	-0.014	0.003
1850	RP11-411K16	9	35836.9	35837.1	STS_OUR	p13.3	0.026	0.037
1851	RP11-501A2	9	37382.6	37586	BEP	p13.2	0.118	0.016
1852	RP11-376F21	9	37933.2	37981.4	TILE_C	p13.1	-0.165	-0.211
1853	RP11-297J7	9	68553.5	68742.3	BEP	q21.11	-0.016	0.063
1854	RP11-291K17	9	68553.5	68717.3	BEP	q21.11	0.065	0.139
1855	RP11-376D18	9	68609.5	68779	BEP	q21.11	0.068	0.088
1856	RP11-380M17	9	68609.5	68767.8	BEP	q21.11	0.016	0.051
1857	RP11-354G19	9	68616.6	68797.1	BEP	q21.11	0.06	0.123
1858	RP11-342H10	9	68627.3	68627.4	STS_OUR	q21.11	-0.031	0.06
1859	RP11-368H6	9	68627.3	68627.4	STS_OUR	q21.11	0.035	0.149
1860	RP11-398H12	9	68627.3	68627.4	STS_OUR	q21.11	0.037	0.168
1861	RP11-312A13	9	69097.3	69099.7	STS_OUR	q21.11	-0.354	0.039
1862	RP11-402D11	9	69097.3	69099.7	STS_OUR	q21.11	-0.316	0.066
1863	RP11-500K8	9	69441.2	69600.1	BEP	q21.12	0.004	0.189
1864	RP11-447L17	9	69940.8	70137.4	BEP	q21.12	0.131	0.146
1865	RP11-305J18	9	72096.5	72096.7	STS_OUR	q21.13	0.106	0.383
1866	RP11-336C18	9	72096.5	72096.7	STS_OUR	q21.13	0.062	0.157
1867	RP11-379C9	9	74565	74737.4	BLAT	q21.13	0.014	-0.187
1868	RP11-458G7	9	76039.4	76039.6	STS_OUR	q21.2	0.022	-0.024
1869	RP11-487O15	9	76039.4	76039.6	STS_OUR	q21.2	0.025	-0.03
1870	RP11-518E9	9	76039.4	76039.6	STS_OUR	q21.2	-0.007	-0.096
1871	RP11-468J21	9	76048.1	76153.4	TILE_C	q21.2	0.07	-0.066
1872	RP11-474K8	9	79418.8	79419	STS_OUR	q21.31	0.119	0.145
1873	RP11-552M3	9	79418.8	79419	STS_OUR	q21.31	0.047	0.056
1874	RP11-522I20	9	83415.2	83584	TILE_C	q21.33	0.009	0.064
1875	RP11-416H7	9	85208.2	85400.1	TIGR_SEQ	q21.33	0.067	0.111
1876	RP11-291B22	9	85296.9	85469.8	BEP	q21.33	0.076	0.065
1877	RP11-388F24	9	85296.9	85449.1	TIGR_SEQ	q21.33	0.089	0.083
1878	RP11-332L7	9	85329.8	85532	INHOUSE_SEQ	q21.33	0.048	0.003
1879	RP11-427J24	9	85863.1	86033.3	BEP	q22.1	0.02	0.046
1880	RP11-476B18	9	85872.2	85872.3	STS_OUR	q22.1	-0.166	-0.113
1881	RP11-322G2	9	87242	87450.5	TILE_UF	q22.2	0.04	-0.032
1882	RP11-331P18	9	87284.2	87457.9	BEP	q22.2	0.097	-0.077
1883	RP11-331N18	9	87363.2	87363.3	STS_OUR	q22.2	0.046	-0.065
1884	RP11-403P9	9	87363.2	87363.3	STS_OUR	q22.2	0.005	-0.052
1885	RP11-418L15	9	87363.2	87363.3	STS_OUR	q22.2	0.013	0.025
1886	RP11-463I17	9	87911	87911.2	STS_OUR	q22.2	0.087	-0.007
1887	RP11-508L20	9	87911	87911.2	STS_OUR	q22.2	0.041	0.007
1888	RP11-516H3	9	87911	87911.2	STS_OUR	q22.2	0.039	-0.038
1889	RP11-521I21	9	88305.1	88479	BEP	q22.2	0.148	0.05
1890	RP11-530P6	9	88306.1	88306.2	STS_OUR	q22.2	0.085	0.035
1891	RP11-565M17	9	88306.1	88306.2	STS_OUR	q22.2	-0.067	-0.067
1892	RP11-576D22	9	88306.1	88306.2	STS_OUR	q22.2	0.063	-0.063
1893	RP11-030F03	9	90804.7	90804.9	STS_OUR	q22.31	0.046	-0.324
1894	RP11-484O23	9	91126	91296.7	BEP	q22.31	-0.011	-0.136
1895	RP11-505K7	9	91250.9	91251.2	STS_OUR	q22.31	0.02	0.009
1896	RP11-502A8	9	92440.9	92648.2	INHOUSE_SEQ	q22.32	0.139	0.119
1897	RP11-448C8	9	92456.4	92456.7	STS_OUR	q22.32	0.067	-0.054
1898	RP11-496A17	9	92456.4	92456.7	STS_OUR	q22.32	0.075	-0.059
1899	RP11-388L5	9	96172.4	96343.8	BEP	q22.33	-0.056	0.031
1900	RP11-358D8	9	96229.9	96402.3	BEP	q22.33	-0.023	0.017
1901	RP11-388P3	9	96332	96332.1	STS_OUR	q22.33	-0.14	-0.02
1902	RP11-490D2	9	97771	97771.4	STS_OUR	q22.33	0.108	0.125
1903	RP11-506A11	9	98864.9	99071	BEP	q31.1	0.028	0.049
1904	RP11-497N24	9	99816.3	100005	BEP	q31.1	0.109	-0.077
1905	RP11-297N21	9	101207	101369	BEP	q31.1	0.136	0.065
1906	RP11-387H15	9	101313	101313	STS_OUR	q31.1	0.115	0.06
1907	RP11-485H6	9	103852	104002	INHOUSE_SEQ	q31.2	0.025	0.013
1908	RP11-428N16	9	105239	105239	STS_OUR	q31.2	0.156	-0.044
1909	RP11-312G2	9	108933	108937	TILE_C	q31.3	0.01	0.007
1910	RP11-543E20	9	109201	109390	BLAT	q31.3	0.124	-0.025
1911	RP11-542C15	9	109218	109218	STS_OUR	q31.3	-0.395	-0.092
1912	RP11-386D8	9	111132	111270	TILE_C	q32	-0.159	0.045
1913	RP11-1008L19	9	119585	119778	BEP	q33.2	0.157	0.22
1914	RP11-328O13	9	120600	120783	BEP	q33.2	-0.036	-0.013
1915	RP11-331P4	9	120746	120746	STS_OUR	q33.2	0.023	-0.009
1916	RP11-298A17	9	121470	121642	TILE_C	q33.3	0.091	0.1
1917	RP11-295D11	9	121946	122127	BEP	q33.3	-0.015	-0.06
1918	RP11-1011K23	9	122762	122947	BEP	q33.3	-0.48	-0.413
1919	RP11-481D12	9	126129	126304	BEP	q34.11	-0.016	-0.066
1920	RP11-516D6	9	126236	126390	BEP	q34.11	0.008	-0.073
1921	RP11-540K18	9	126249	126250	STS_OUR	q34.11	-0.133	-0.07
1922	RP11-395P17	9	127941	128135	TILE_C	q34.11	0.024	-0.161
1923	RP11-397J23	9	127950	127951	STS_OUR	q34.11	-0.117	-0.145
1924	RP11-314B12	9	128802	128964	BEP	q34.12	-0.008	-0.08
1925	RP11-333N2	9	128914	128914	STS_OUR	q34.12	-0.176	-0.123
1926	RP11-299J6	9	129583	129766	BEP	q34.13	-0.162	-0.278
1927	RP11-409K20	9	129641	129811	TILE_C	q34.13	-0.055	-0.236
1928	RP11-323J1	9	129729	129729	STS_OUR	q34.13	-0.116	-0.226
1929	RP11-353C22	9	131378	131588	BEP	q34.2	-0.066	-0.08
1930	RP11-299M17	9	131565	131566	STS_OUR	q34.2	0.055	-0.073
1931	RP11-343H1	9	131565	131566	STS_OUR	q34.2	0.007	-0.064
1932	RP11-402I6	9	131565	131566	STS_OUR	q34.2	-0.039	-0.038
1933	RP11-403D19	9	131565	131566	STS_OUR	q34.2	0	-0.052
1934	RP11-484H17	9	131565	131566	STS_OUR	q34.2	-0.09	-0.02
1935	RP11-553A23	9	132138	132283	BEP	q34.2	-0.103	-0.1
1936	RP11-311J21	9	135069	135253	BEP	q34.3	-0.055	-0.128
1937	RP11-399H11	9	135198	135420	TILE_C	q34.3	-0.118	-0.117
1938	RP11-355J12	9	135775	135984	BEP	q34.3	-0.233	-0.206
1939	RP11-498D23	9	135792	135984	BEP	q34.3	-0.183	-0.123
1940	RP11-386G15	9	135926	135927	STS_OUR	q34.3	0.099	-0.045
1941	RP11-509D6	9	135940	135940	STS_OUR	q34.3	-0.068	-0.071
1942	RP11-442G23	9	136892	137102	BEP	q34.3	-0.133	-0.181
1943	RP11-523A20	9	137072	137102	TILE_C	q34.3	-0.03	-0.035
1944	RP11-417A4	9	137679	137872	BLAT	q34.3	-0.009	-0.181
1945	RP11-567B24	10	99.676	279.309	BEP	p15.3	0.034	0.036
1946	RP11-387K19	10	149.097	312.071	BEP	p15.3	-0.01	-0.021
1947	RP11-298F8	10	159.08	327.364	BEP	p15.3	-0.22	-0.013
1948	RP11-498C17	10	277.974	278.115	STS_OUR	p15.3	0.032	0.063
1949	RP11-486H9	10	286.972	466.727	TILE_C	p15.3	-0.009	0.038
1950	RP11-383L17	10	311.427	311.78	STS_OUR	p15.3	0.112	0.067
1951	RP11-521I9	10	311.427	311.78	STS_OUR	p15.3	0.057	0.053
1952	RP11-490E15	10	464.727	494.604	TILE_C	p15.3	0.074	-0.091
1953	RP11-535M7	10	723.023	881.503	INHOUSE_SEQ	p15.3	-0.061	-0.033
1954	RP11-467O8	10	729.593	902.872	TIGR_SEQ	p15.3	0.127	0.083
1955	RP11-569B6	10	754.345	919.939	BEP	p15.3	0.053	-0.034
1956	RP11-480L15	10	799.712	955.208	BEP	p15.3	0.084	-0.01
1957	RP11-361D4	10	1165.31	1165.39	STS_OUR	p15.3	0.595	0.019
1958	RP11-371I24	10	1165.31	1165.39	STS_OUR	p15.3	0.622	0.003
1959	RP11-387A23	10	1165.31	1165.39	STS_OUR	p15.3	-0.683	0.009
1960	RP11-399A17	10	1165.31	1165.39	STS_OUR	p15.3	0.514	0.096
1961	RP11-405C4	10	1165.31	1165.39	STS_OUR	p15.3	0.599	0.022
1962	RP11-317M16	10	3656.19	3837.91	BEP	p15.2	0.042	-0.052
1963	RP11-375N5	10	3706.78	3906.19	BEP	p15.1	-0.132	-0.043
1964	RP11-501A10	10	3813.42	3813.76	STS_OUR	p15.1	0.082	-0.015
1965	RP11-387M15	10	4837.66	5012.92	TIGR_SEQ	p15.1	0.077	0.063
1966	RP11-347D10	10	4909.4	5102.52	BLAT	p15.1	0.23	0.015
1967	RP11-301O2	10	4951.36	5121.94	TIGR_SEQ	p15.1	0.142	0.009
1968	RP11-449P20	10	6131.78	6314.77	BLAT	p15.1	-0.161	-0.15
1969	RP11-518M13	10	6221.94	6222.21	STS_OUR	p15.1	-0.045	-0.209
1970	RP11-391E8	10	7318.85	7496.19	BEP	p14	-0.146	-0.172
1971	RP11-405I1	10	7421.49	7421.71	STS_OUR	p14	0.024	-0.075
1972	RP11-415B18	10	7421.49	7421.71	STS_OUR	p14	-0.028	-0.104
1973	RP11-524P14	10	8052.31	8228.99	BEP	p14	-0.003	-0.155
1974	RP11-431J11	10	8156.82	8157.14	STS_OUR	p14	-0.021	-0.12
1975	RP11-334I11	10	10386.6	10573.6	BEP	p14	0.021	-0.045
1976	RP11-313N24	10	10432.5	10622.8	BEP	p14	0.065	-0.067
1977	RP11-497G22	10	10979.1	11197.4	BEP	p14	-0.095	-0.005
1978	RP11-488D1	10	11112.3	11112.7	STS_OUR	p14	-0.08	-0.026
1979	RP11-544J7	10	11192.8	11377.3	TIGR_SEQ	p14	-0.082	-0.116
1980	RP11-381D12	10	11197	11389.6	BEP	p14	-0.019	-0.083
1981	RP11-546B16	10	11197.4	11373	BEP	p14	-0.141	-0.042
1982	RP11-515M6	10	11232.5	11410.1	TIGR_SEQ	p14	0.033	-0.081
1983	RP11-444D9	10	11277.7	11278	STS_OUR	p14	0.023	-0.038
1984	RP11-468F14	10	11277.7	11278	STS_OUR	p14	0.005	-0.052
1985	RP11-501L24	10	11277.7	11278	STS_OUR	p14	-0.047	-0.102
1986	RP11-308O12	10	11359.8	11360	STS_OUR	p14	0.02	-0.05
1987	RP11-348G8	10	12085.1	12274.9	TILE_C	p14	0.035	0.01
1988	RP11-348M15	10	12085.1	12274.9	BEP	p14	0.102	0.026
1989	RP11-291L1	10	12247.1	12247.4	STS_OUR	p13	0.099	0.027
1990	RP11-395L24	10	12247.1	12247.4	STS_OUR	p13	0.051	-0.004
1991	RP11-431E12	10	12247.1	12247.4	STS_OUR	p13	-0.069	-0.084
1992	RP11-298G17	10	14906.2	15086.3	BEP	p13	-0.02	-0.104
1993	RP11-307G24	10	14909.6	15097.1	BEP	p13	-0.011	-0.121
1994	RP11-299M5	10	15596.2	15794	BEP	p13	-0.062	-0.151
1995	RP11-319E7	10	15678.8	15678.9	STS_OUR	p13	0.008	-0.116
1996	RP11-310J8	10	15771.5	15994.4	BEP	p13	-0.016	-0.082
1997	RP11-347C8	10	16713.3	16884.5	BEP	p13	0.053	-0.165
1998	RP11-330N10	10	16783.1	16941.1	BLAT	p13	0.134	-0.087
1999	RP11-387G3	10	18589.5	18776.3	BEP	p12.32	-0.005	-0.15
[truncated: 1,528 more rows]

## Sheet: Supplementary Table 4
chromosome	start	stop	map	Name	ID	134M	134A	ZRM	ZRA
1	365197	369085	1:365197..369085		21910_1	-0.036	9.984	0.039	9.984
1	487037	487427	1:487037..487427	OR4F16	1839643_1	0.038	7.83	-0.009	7.83
1	817704	818559	1:817704..818559	LOC284591	1659132_1	-0.001	8.213	-0.021	8.213
1	817704	818559	1:817704..818559	LOC284591	38554_1	1.168	8.531	0.496	8.531
1	936109	941162	1:936109..941162	KLHL17	190915_1	-4.71	10.604	-4.51	10.604
1	995619	1031419	1:995619..1031419	AGRN	810801_1	0.045	7.434	-0.011	7.434
1	1217750	1219337	1:1217750..1219337		1867260_1	-0.03	8.787	-0.109	8.787
1	1244147	1244543	1:1244147..1244543	UBE2J2	758019_1	0.009	7.557	0.037	7.557
1	1255890	1267327	1:1255890..1267327	SCNN1D	1751483_1	-0.03	8.354	-0.092	8.354
1	1310580	1324415	1:1310580..1324415	DVL1	47021_2	0.26	8.393	0.302	8.393
1	1310580	1324415	1:1310580..1324415	DVL1	47021_1	0.286	8.712	0.391	8.712
1	1349063	1349748	1:1349063..1349748	AKIP	172995_1	0.355	9.679	0.719	9.679
1	1498672	1518492	1:1498672..1518492	ATAD3B	43219_1	-0.081	8.914	0.377	8.914
1	1550381	1551318	1:1550381..1551318	ATAD3A	2457404_1	-0.151	13.975	-0.412	13.975
1	1582998	1595231	1:1582998..1595231	HSPC182	279012_1	0.25	10.791	-0.106	10.791
1	1662225	1662575	1:1662225..1662575	FLJ13052	381260_1	-0.342	9.645	-0.131	9.645
1	1821959	1822452	1:1821959..1822452	GNB1	1676510_1	-0.164	9.705	-0.184	9.705
1	1821959	1822452	1:1821959..1822452	GNB1	730862_1	0.26	9.185	0.073	9.185
1	1878866	1880895	1:1878866..1880895	CAGLP	1624292_1	0.163	8.25	0.192	8.25
1	1983004	1994352	1:1983004..1994352	GABRD	175536_1	-0.062	7.289	-0.001	7.289
1	2058852	2064620	1:2058852..2064620	PRKCZ	155123_1	-0.007	10.779	0.109	10.779
1	2217086	2217491	1:2217086..2217491	SKI	263884_1	-0.805	9.515	-0.523	9.515
1	2217086	2217491	1:2217086..2217491	SKI	221499_1	-0.308	11.592	-0.546	11.592
1	2368512	2369044	1:2368512..2369044	RER1	305995_1	0.11	9.859	0.244	9.859
1	2472133	2490173	1:2472133..2490173	PANK4	344974_1	0.03	8.363	-0.08	8.363
1	2492345	2492604	1:2492345..2492604	HES5	342634_1	-0.288	9.839	-0.544	9.839
1	2521531	2526042	1:2521531..2526042	TNFRSF14	363721_1	0.021	13.145	1.544	13.145
1	2580225	2581042	1:2580225..2581042	MGC26818	157848_1	0.533	9.334	0.776	9.334
1	3252462	3252917	1:3252462..3252917	PRDM16	1323445_1	-0.088	7.75	-0.12	7.75
1	3252462	3252917	1:3252462..3252917	PRDM16	1624739_1	0.128	9.133	0.366	9.133
1	3394396	3420832	1:3394396..3420832	ARHGEF16	756373_1	-0.349	8.524	0.125	8.524
1	3429640	3471169	1:3429640..3471169	EGFL3	346691_1	0.002	9.549	-0.414	9.549
1	3429640	3471169	1:3429640..3471169	EGFL3	2155017_1	0.568	11.875	0.636	11.875
1	3571606	3579346	1:3571606..3579346	WDR8	196040_1	0.165	9.105	-0.009	9.105
1	3592285	3673013	1:3592285..3673013	TP73	6275646_1	-0.049	7.374	0.104	7.374
1	3675706	3687043	1:3675706..3687043	KIAA0495	292730_1	-0.197	11.341	-0.621	11.341
1	4625477	4754223	1:4625477..4754223	SHREW1	46740_1	-1.288	8.206	-1.152	8.206
1	6028608	6095505	1:6028608..6095505	KCNAB2	251158_1	-0.173	9.561	-0.596	9.561
1	6028608	6095505	1:6028608..6095505	KCNAB2	48631_1	-0.464	7.952	-0.582	7.952
1	6179359	6180601	1:6179359..6180601	RPL22	24526_1	0.565	13.442	0.863	13.442
1	6211554	6215125	1:6211554..6215125	FLJ32096	153728_2	0.34	10.805	0.076	10.805
1	6211554	6215125	1:6211554..6215125	FLJ32096	153728_1	0.083	7.444	0.102	7.444
1	6217817	6219377	1:6217817..6219377	ICMT	193483_1	-0.655	10.919	0.176	10.919
1	6385945	6386279	1:6385945..6386279	BACH	324316_1	0.75	10.648	0.708	10.648
1	6385945	6386279	1:6385945..6386279	BACH	1736025_1	0.106	7.47	-0.1	7.47
1	6409561	6418996	1:6409561..6418996	HES2	1877202_1	-0.066	7.338	-0.066	7.338
1	6460417	6471914	1:6460417..6471914	KIAA0720	35464_1	0.12	7.773	0.067	7.773
1	6549699	6574083	1:6549699..6574083	TAS1R1	2367578_1	0.093	7.713	0.028	7.713
1	6619517	6629911	1:6619517..6629911	THAP3	1391353_1	0.013	8.252	0.102	8.252
1	6657622	6657749	1:6657622..6657749	DNAJC11	44401_1	0.107	10.788	0.58	10.788
1	7362989	7363435	1:7362989..7363435	CAMTA1	46685_1	1.528	8.442	0.601	8.442
1	7362989	7363435	1:7362989..7363435	CAMTA1	137150_1	0.582	11.484	0.29	11.484
1	7765594	7775758	1:7765594..7775758	VAMP3	241884_1	-0.189	11.019	-0.104	11.019
1	7837408	7847834	1:7837408..7847834	UTS2	926809_1	-3.053	9.139	-3.027	9.139
1	7977284	7979607	1:7977284..7979607	PARK7	343873_1	0.163	9.87	0.595	9.87
1	8006048	8020634	1:8006048..8020634	MIG-6	243725_1	-1.345	11.794	-1.947	11.794
1	8006048	8020634	1:8006048..8020634	MIG-6	247786_1	-0.318	12.159	-0.519	12.159
1	8327582	8329340	1:8327582..8329340	DNB5	165882_1	0.045	8.427	0.052	8.427
1	8351554	8352160	1:8351554..8352160	RERE	193871_1	-0.259	11.787	-0.487	11.787
1	8351554	8352160	1:8351554..8352160	RERE	771006_1	0.623	10.203	0.321	10.203
1	8855329	8858370	1:8855329..8858370	ENO1	2203755_1	0.511	12.007	0.467	12.007
1	8855329	8858370	1:8855329..8858370	ENO1	2303521_1	-0.065	7.732	0.111	7.732
1	8955800	8957934	1:8955800..8957934	CA6	823718_1	0.064	7.807	0.023	7.807
1	8955800	8957934	1:8955800..8957934	CA6	4746599_1	0.057	8.187	-0.123	8.187
1	9054571	9055197	1:9054571..9055197	SLC2A5	795595_1	-0.355	7.961	-0.243	7.961
1	9246248	9246704	1:9246248..9246704	H6PD	302392_1	-0.12	8.478	-0.157	8.478
1	9246248	9246704	1:9246248..9246704	H6PD	206270_1	-0.026	13.254	-0.602	13.254
1	9246248	9246704	1:9246248..9246704	H6PD	309900_1	0.121	8.674	-0.963	8.674
1	9350150	9362190	1:9350150..9362190	SSB1	121577_1	-0.341	11.509	-0.494	11.509
1	9415537	9416161	1:9415537..9416161		1388000_1	-0.096	7.892	-0.002	7.892
1	9723349	9744146	1:9723349..9744146	PIK3CD	712401_1	0.004	7.557	-0.068	7.557
1	9723349	9744146	1:9723349..9744146	PIK3CD	1337007_1	0.017	7.234	-0.042	7.234
1	9723351	9818850	1:9723351..9818850	CLSTN1	32097_1	-0.052	11.79	0.517	11.79
1	9875851	9876329	1:9875851..9876329	CTNNBIP1	788187_1	0.672	8.799	0.422	8.799
1	9960583	9961215	1:9960583..9961215		345233_1	0.361	8.59	0.149	8.59
1	9991529	10010344	1:9991529..10010344	RBP7	5224517_1	0.041	7.293	0.113	7.293
1	10027308	10175563	1:10027308..10175563	UBE4B	248967_1	-0.155	10.418	0.017	10.418
1	10323504	10323978	1:10323504..10323978	KIF1B	754208_1	-0.328	9.702	-0.544	9.702
1	10323504	10323978	1:10323504..10323978	KIF1B	345646_1	-0.456	9.821	-0.484	9.821
1	10411882	10412190	1:10411882..10412190	PGD	1519748_1	0.146	7.771	-0.06	7.771
1	10411882	10412190	1:10411882..10412190	PGD	152466_1	0.385	11.643	0.448	11.643
1	10424424	10446476	1:10424424..10446476	CORT	283751_1	0.461	10.395	0.413	10.395
1	10454853	10466879	1:10454853..10466879	DFFA	841357_1	-0.157	7.522	-0.052	7.522
1	10534640	10535200	1:10534640..10535200	PEX14	223189_1	0.219	8.291	0.231	8.291
1	10658435	10658877	1:10658435..10658877	FLJ20321	2139730_1	0.368	11.752	0.4	11.752
1	10946317	10946810	1:10946317..10946810	FLJ37118	1556499_1	0.093	7.819	0.027	7.819
1	11006944	11019815	1:11006944..11019815	TARDBP	41775_1	-0.141	9.972	-0.02	9.972
1	11006944	11019815	1:11006944..11019815	TARDBP	27469_2	-0.345	9.042	0.16	9.042
1	11006944	11019815	1:11006944..11019815	TARDBP	27469_1	0.106	10.263	0.16	10.263
1	11060944	11094191	1:11060944..11094191	EXOSC10	841179_1	0.118	8.094	0.052	8.094
1	11100857	11256832	1:11100857..11256832	FRAP1	211168_1	0.47	10.289	0.25	10.289
1	11183663	11190304	1:11183663..11190304	ANGPTL7	288814_1	-0.288	9.617	0.261	9.617
1	11293423	11293897	1:11293423..11293897		50860_1	-0.137	10.344	-0.352	10.344
1	11444608	11445138	1:11444608..11445138	KIAA1337	33237_1	-0.065	7.564	-0.011	7.564
1	11661709	11662074	1:11661709..11662074	FBXO6	154079_1	0.163	8.455	0.251	8.455
1	11686051	11720180	1:11686051..11720180	LOC374946	1585952_1	-0.02	12.138	0.751	12.138
1	11780925	11800248	1:11780925..11800248	MTHFR	125211_1	-0.594	8.334	-0.191	8.334
1	11804421	11805230	1:11804421..11805230	CLCN6	26151_1	-0.193	8.181	-0.134	8.181
1	11804421	11805230	1:11804421..11805230	CLCN6	213753_1	0.006	7.592	0.097	7.592
1	11851786	11852653	1:11851786..11852653	NPPB	1742450_1	-0.15	7.578	-0.143	7.578
1	11916994	11917684	1:11916994..11917684	MGC33867	142055_1	-0.28	10.482	0.157	10.482
1	11929011	11969860	1:11929011..11969860	PLOD1	153530_1	-1.056	10.348	-0.859	10.348
1	11974634	12007831	1:11974634..12007831	MFN2	724063_1	0.447	12.196	0.961	12.196
1	12013788	12026366	1:12013788..12026366	FLJ12438	29961_1	-0.093	10.797	-0.329	10.797
1	12057699	12138530	1:12057699..12138530	TNFRSF8	505538_1	0.006	7.281	-0.047	7.281
1	12604982	12605694	1:12604982..12605694	DHRS3	233895_1	-0.338	8.114	-0.339	8.114
1	12604982	12605694	1:12604982..12605694	DHRS3	594630_1	-0.056	10.625	-0.11	10.625
1	12604982	12605694	1:12604982..12605694	DHRS3	306537_1	-0.689	8.759	-0.726	8.759
1	12754251	12758113	1:12754251..12758113	MGC35194	731098_1	0.323	8.766	0.099	8.766
1	13655557	13689758	1:13655557..13689758	T1A-2	488207_1	-0.975	8.079	-0.788	8.079
1	13792586	13793278	1:13792586..13793278	PRDM2	1618720_1	0.039	7.584	0.051	7.584
1	13792586	13793278	1:13792586..13793278	PRDM2	1526834_1	0.114	7.96	0.196	7.96
1	14670505	15138362	1:14670505..15138362	KIAA1026	131582_1	0.057	8.535	-0.049	8.535
1	14793988	14794425	1:14793988..14794425		180851_1	-0.046	9.534	-0.308	9.534
1	15170830	15189850	1:15170830..15189850	FLJ43806	40164_1	-0.112	7.612	-0.019	7.612
1	15528532	15543891	1:15528532..15543891	ELA2A	1412412_1	0.024	7.566	0.1	7.566
1	15564096	15596096	1:15564096..15596096	CASP9	121693_1	0.151	8.859	0.044	8.859
1	15643505	15644127	1:15643505..15644127	DDI2	143932_1	0.265	8.898	0.501	8.898
1	15731669	15733523	1:15731669..15733523	RSC1A1	151251_1	0.535	9.84	0.117	9.84
1	15754817	15755299	1:15754817..15755299	RSC1A1	133622_1	0.23	9.646	0.146	9.646
1	15808114	15813190	1:15808114..15813190	LOC284723	745473_1	-0.177	12.742	-0.453	12.742
1	15830297	15831033	1:15830297..15831033	FBLP-1	323193_1	-0.781	8.244	-0.701	8.244
1	16013669	16047820	1:16013669..16047820	ZBTB17	755373_1	0.083	7.384	0.033	7.384
1	16076036	16080608	1:16076036..16080608	MGC24047	155072_1	1.219	10.014	1.521	10.014
1	16085829	16086735	1:16085829..16086735	HSPB7	309346_1	-0.107	7.965	-0.125	7.965
1	16196137	16227870	1:16196137..16227870	EPHA2	241530_1	-0.415	9.511	-0.365	9.511
1	16269907	16270532	1:16269907..16270532	ARHGEF19	341035_1	0.458	8.023	0.041	8.023
1	16308771	16309226	1:16308771..16309226		49504_1	-0.155	8.385	-0.078	8.385
1	16324145	16325394	1:16324145..16325394	FBXO42	248994_1	0.106	9.34	-0.033	9.34
1	16439042	16469945	1:16439042..16469945	DKFZp566C0424	324258_1	0.123	9.479	0.282	9.479
1	16512558	16531878	1:16512558..16531878	FLJ10420	172028_1	-0.026	9.444	-0.269	9.444
1	16512558	16531878	1:16512558..16531878	FLJ10420	277079_1	0.554	9.03	0.807	9.03
1	16539236	16564502	1:16539236..16564502		278637_1	-0.219	8.982	-0.369	8.982
1	16583350	16583850	1:16583350..16583850		29644_1	-0.042	12.58	-0.429	12.58
1	16662351	16663025	1:16662351..16663025		289507_1	0.973	12.018	1.541	12.018
1	16716559	16722148	1:16716559..16722148	MST1	193087_1	0.021	7.439	0.086	7.439
1	16757373	16758050	1:16757373..16758050	EIF1AP1	704778_1	1.573	11.854	1.191	11.854
1	16960342	16961180	1:16960342..16961180		727174_1	-1.638	9.055	-0.55	9.055
1	17046302	17052422	1:17046302..17052422	MFAP2	789257_1	0.276	8.29	-0.035	8.29
1	17096170	17096669	1:17096170..17096669	SDHB	486492_1	0.174	11.482	0.026	11.482
1	17138562	17191236	1:17138562..17191236	PADI2	180704_1	0.335	8.717	1.37	8.717
1	17478584	17511526	1:17478584..17511526	TD-60	470011_1	-0.57	11.401	-0.096	11.401
1	17615961	17619278	1:17615961..17619278	SERPINE1	590369_1	-2.496	9.043	-2.185	9.043
1	17615961	17619278	1:17615961..17619278	SERPINE1	244307_1	-2.161	10.746	-1.811	10.746
1	17761636	17762333	1:17761636..17762333	FLJ10521	50777_1	0.531	8.891	0.453	8.891
1	17761636	17762333	1:17761636..17762333	FLJ10521	115162_1	-0.042	7.575	0.056	7.575
1	17894784	17898862	1:17894784..17898862	LOC81569	795269_1	-0.089	8.272	0.135	8.272
1	18425457	18426199	1:18425457..18426199	MGC15730	39510_1	-0.259	8.629	-0.28	8.629
1	18943231	18974378	1:18943231..18974378	ALDH4A1	121267_2	0.119	7.68	0.114	7.68
1	18943231	18974378	1:18943231..18974378	ALDH4A1	121267_3	0.076	7.713	0.153	7.713
1	18943231	18974378	1:18943231..18974378	ALDH4A1	121267_4	0.127	7.56	0.187	7.56
1	18943231	18974378	1:18943231..18974378	ALDH4A1	121267_1	0.159	8.217	0.507	8.217
1	18976085	18976619	1:18976085..18976619	LOC126917	752824_1	0.614	8.889	0.461	8.889
1	19287463	19323317	1:19287463..19323317	KIAA0090	35453_1	-0.805	9.247	-0.983	9.247
1	19389398	19401100	1:19389398..19401100	PQLC2	1714994_2	-0.117	13.425	-0.397	13.425
1	19389398	19401100	1:19389398..19401100	PQLC2	1714994_3	0.038	7.828	0.009	7.828
1	19389398	19401100	1:19389398..19401100	PQLC2	1714994_4	-0.024	8.12	-0.173	8.12
1	19389398	19401100	1:19389398..19401100	PQLC2	1714994_1	0.037	7.666	-0.027	7.666
1	19464029	19464347	1:19464029..19464347	CAPZB	769911_1	0.175	8.838	0.608	8.838
1	19532701	19533463	1:19532701..19533463		110478_1	0.059	8.159	-0.048	8.159
1	19715031	19730251	1:19715031..19730251	NBL1	898305_1	1.138	8.993	0.807	8.993
1	19737085	19751361	1:19737085..19751361	HTR6	31955_1	0.006	7.615	0.154	7.615
1	19795239	19795955	1:19795239..19795955	LOC255104	121994_1	-0.361	11.091	-0.566	11.091
1	19976122	19984735	1:19976122..19984735	KIAA0459	49291_1	-0.022	14.148	-0.22	14.148
1	20048316	20049006	1:20048316..20049006	PLA2G2A	297804_1	-0.328	7.788	-0.431	7.788
1	20155374	20162982	1:20155374..20162982	PLA2G5	135692_1	-0.014	7.839	0.079	7.839
1	20257886	20267847	1:20257886..20267847	UBXD3	1868587_1	0.145	8.026	0.004	8.026
1	20413162	20413696	1:20413162..20413696	FLJ32784	2347699_1	0.014	7.709	0.047	7.709
1	20554189	20554665	1:20554189..20554665	CaMKIINalpha	4703846_1	0.088	7.358	-0.104	7.358
1	20554189	20554665	1:20554189..20554665	CaMKIINalpha	192325_1	2.83	10.576	0.214	10.576
1	20571248	20579960	1:20571248..20579960	FLJ12875	344449_1	0.149	8.638	0.018	8.638
1	20674011	20674210	1:20674011..20674210	CDA	1551030_1	-0.387	7.748	-0.377	7.748
1	20719413	20723077	1:20719413..20723077	PINK1	44023_1	0.674	8.802	-0.026	8.802
1	20722270	20723116	1:20722270..20723116	DDOST	39140_1	0.009	10.592	-0.147	10.592
1	20735814	20789816	1:20735814..20789816	KIF17	1540579_1	-0.066	7.633	-0.017	7.633
1	20804678	20805751	1:20804678..20805751	LOC400745	136909_1	0.535	9.846	0.408	9.846
1	20814480	20858430	1:20814480..20858430	HP1-BP74	111571_1	0.106	8.73	0.333	8.73
1	21012238	21012847	1:21012238..21012847	EIF4G3	823972_1	-0.687	9.767	-0.48	9.767
1	21337880	21338812	1:21337880..21338812	ECE1	704290_1	0.015	7.448	-0.034	7.448
1	21538081	21538538	1:21538081..21538538	AE2	2064214_1	0.84	8.723	-0.101	8.723
1	21706807	21709781	1:21706807..21709781	RAP1GA1	42808_1	0.043	7.941	0.054	7.941
1	21838068	21838406	1:21838068..21838406	USP48	136874_1	-0.214	12.151	-0.494	12.151
1	21884063	21897020	1:21884063..21897020		155559_1	0.063	10.454	0.141	10.454
1	22052911	22070193	1:22052911..22070193	ELA3B	328802_1	0.201	11.073	0.258	11.073
1	22074800	22081654	1:22074800..22081654	ELA3A	1412502_1	0.039	7.666	0.122	7.666
1	22160363	22160722	1:22160363..22160722	CDC42	196533_1	1.362	12.112	0.845	12.112
1	22189103	22190725	1:22189103..22190725	WNT4	52090_1	0.316	9.167	0.177	9.167
1	22189103	22190725	1:22189103..22190725	WNT4	154160_1	0.294	9.342	0.6	9.342
1	22601861	22602491	1:22601861..22602491	KIAA0478	234436_1	0.074	7.586	0.074	7.586
1	22601861	22602491	1:22601861..22602491	KIAA0478	201759_1	-0.113	8.399	-0.313	8.399
1	22635322	22675393	1:22635322..22675393	EPHA8	1910989_1	-0.151	8.443	-0.133	8.443
1	22710997	22711407	1:22710997..22711407	C1QA	1637203_1	0.057	7.352	0.011	7.352
1	22716698	22717123	1:22716698..22717123	C1QG	210455_1	-0.042	8.82	-0.265	8.82
1	22985298	22986386	1:22985298..22986386	EPHB2	345103_1	-0.09	8.235	0.103	8.235
1	22987969	22992653	1:22987969..22992653		2223222_1	0.347	10.261	0.221	10.261
1	23375579	23378431	1:23375579..23378431	HNRPR	201620_1	0.366	12.664	0.349	12.664
1	23431247	23441241	1:23431247..23441241	ZNF436	229500_1	0.575	8.628	0.601	8.628
1	23452860	23496567	1:23452860..23496567	TCEA3	5797769_1	0.094	7.72	1.172	7.72
1	23452860	23496567	1:23452860..23496567	TCEA3	900233_1	0.059	8.074	1.571	8.074
1	23500361	23556004	1:23500361..23556004	DDEFL1	277271_1	0.27	11.248	0.679	11.248
1	23584248	23584854	1:23584248..23584854	E2F2	346464_1	0.014	8.585	0.44	8.585
1	23630908	23631282	1:23630908..23631282	ID3	3543936_1	0.109	10.664	1.364	10.664
1	23776965	23777418	1:23776965..23777418	AD7C-NTP	2290805_1	0.602	12.374	0.583	12.374
1	23826749	23829991	1:23826749..23829991	TCEB3	526657_1	-1.827	8.229	-1.542	8.229
1	23850193	23860448	1:23850193..23860448	HT014	175027_1	-0.358	10.025	-0.716	10.025
1	23866825	23867333	1:23866825..23867333	LYPLA2	23138_1	0.447	8.692	0.146	8.692
1	23874641	23875256	1:23874641..23875256	HMGCL	756285_1	0.448	10.752	0.63	10.752
1	23927278	23927680	1:23927278..23927680	FUCA1	159308_1	-0.339	10.091	-0.834	10.091
1	24031635	24035237	1:24031635..24035237	PNRC2	491739_1	0.352	12.004	-0.255	12.004
1	24042174	24049448	1:24042174..24049448	FUSIP1	135214_1	0.17	11.369	-0.079	11.369
1	24042174	24049448	1:24042174..24049448	FUSIP1	47096_1	-0.171	10.717	-0.579	10.717
1	24191566	24214917	1:24191566..24214917	IL22RA1	67071_1	-0.249	8.087	-0.174	8.087
1	24240015	24240367	1:24240015..24240367	IL28RA	2390815_1	-0.497	11.276	-0.92	11.276
1	24240015	24240367	1:24240015..24240367	IL28RA	346455_1	-0.269	8.047	-0.297	8.047
1	24394140	24394651	1:24394140..24394651	TFCP2L4	148624_1	0.019	7.628	-0.064	7.628
1	24568065	24607197	1:24568065..24607197		1620366_1	-0.002	8.225	0.143	8.225
1	24598423	24599109	1:24598423..24599109	DSCR1L2	132828_1	0.377	8.285	0.421	8.285
1	24611011	24611926	1:24611011..24611926		346915_1	-0.145	12.202	-0.406	12.202
1	24714899	24745067	1:24714899..24745067	SRRM1	1690433_1	-0.21	8.22	0.11	8.22
1	24841867	24842370	1:24841867..24842370	CLIC4	1184029_1	0.038	8.806	-0.163	8.806
1	24841867	24842370	1:24841867..24842370	CLIC4	149203_1	-1.494	11.68	-1.344	11.68
1	24971363	25001674	1:24971363..25001674	RUNX3	291478_1	0.02	7.633	0.071	7.633
1	25302091	25304299	1:25302091..25304299	P29	49546_1	0.094	11.2	-0.514	11.2
1	25314051	25409972	1:25314051..25409972	NPD014	48297_1	-0.18	11.044	-0.97	11.044
1	25462555	25492625	1:25462555..25492625	RHCE	247103_1	-0.428	7.779	-0.286	7.779
1	25462555	25492625	1:25462555..25492625	RHCE	741379_1	-0.103	10.315	-0.372	10.315
1	25595422	25598898	1:25595422..25598898		1847780_1	-0.03	7.433	0.031	7.433
1	25715088	25715836	1:25715088..25715836	MAN1C1	233880_1	0.323	8.302	-0.102	8.302
1	25715088	25715836	1:25715088..25715836	MAN1C1	296792_1	0.089	7.797	0.08	7.797
1	25814849	25815312	1:25814849..25815312	SEPN1	66761_1	0.078	7.517	-0.005	7.517
1	25832159	25843573	1:25832159..25843573	LOC56181	809513_1	-0.143	9.809	0.24	9.809
1	25844642	25869991	1:25844642..25869991	MGC2603	1753558_1	-0.321	12.172	-0.701	12.172
1	25870245	25874054	1:25870245..25874054	MPRA	1642556_1	-2.772	11.572	-0.643	11.572
1	25911200	25917050	1:25911200..25917050	STMN1	1476065_2	1.126	12.068	1.109	12.068
1	25911200	25917050	1:25911200..25917050	STMN1	1476065_1	0.995	12.491	1.059	12.491
1	25971402	26001555	1:25971402..26001555	PAFAH2	268112_1	0.386	9.564	0.731	9.564
1	26032412	26047074	1:26032412..26047074	EXTL1	172765_1	-0.281	8.443	-0.245	8.443
1	26048654	26056618	1:26048654..26056618	SLC30A2	130926_1	-0.266	12.232	-0.73	12.232
1	26173756	26174595	1:26173756..26174595		1416081_1	-0.011	7.596	-0.121	7.596
1	26236221	26236991	1:26236221..26236991	GLYCTK	308742_1	-0.21	8.663	-0.065	8.663
1	26244834	26289441	1:26244834..26289441	DKFZP434L0117	110307_1	-0.35	12.021	-0.649	12.021
1	26292914	26317269	1:26292914..26317269	SOC	121239_1	0.043	7.599	0.104	7.599
1	26328633	26331156	1:26328633..26331156	CDW52	3345325_1	0.001	7.409	-0.008	7.409
1	26328633	26331156	1:26328633..26331156	CDW52	1839792_1	-0.326	7.551	-0.144	7.551
1	26332491	26354484	1:26332491..26354484	AIM1L	139179_1	0.219	7.759	0.077	7.759
1	26421410	26440355	1:26421410..26440355	LIN28	1258339_1	-2.804	10.175	-2.199	10.175
1	26483147	26485879	1:26483147..26485879	HMGN2	241826_1	0.106	9.877	-0.098	9.877
1	26540406	26585658	1:26540406..26585658	RPS6KA1	788511_1	-0.041	7.448	0.144	7.448
1	26719555	26720123	1:26719555..26720123	ARID1A	289719_1	-0.059	10.988	-0.099	10.988
1	26798827	26809026	1:26798827..26809026	PIGV	1638491_1	0.002	7.774	0.011	7.774
1	26865241	26866349	1:26865241..26866349	ZDHHC18	47963_2	0.428	10.541	0.391	10.541
1	26865241	26866349	1:26865241..26866349	ZDHHC18	47963_1	-0.07	7.535	-0.02	7.535
1	26873815	26874527	1:26873815..26874527	SFN	346610_1	-2.857	9.553	-2.283	9.553
1	26886765	26888802	1:26886765..26888802	FLJ10349	342009_1	-0.362	8.62	-0.312	8.62
1	26886765	26888802	1:26886765..26888802	FLJ10349	124559_1	0.319	7.99	0.133	7.99
1	26922121	26924599	1:26922121..26924599	NR0B2	418138_1	0.236	7.597	-0.061	7.597
1	26952150	26956289	1:26952150..26956289	NUDC	294165_1	-0.186	10.143	-0.519	10.143
1	27004353	27011531	1:27004353..27011531		485095_1	-0.026	7.856	-0.28	7.856
1	27152765	27153566	1:27152765..27153566	SLC9A1	123222_1	-0.146	11.869	0.509	11.869
1	27152765	27153566	1:27152765..27153566	SLC9A1	30272_1	0.19	8.135	0.253	8.135
1	27339044	27339765	1:27339044..27339765	DKFZP564D0478	770856_1	0.038	8.551	0.355	8.551
1	27353239	27353386	1:27353239..27353386	SYTL1	158297_1	-0.049	7.867	0.071	7.867
1	27379773	27380791	1:27379773..27380791	FCN3	129964_1	0.004	7.735	-0.109	7.735
1	27550849	27551572	1:27550849..27551572	DJ159A19.3	309659_1	0.015	9.785	0.412	9.785
1	27550849	27551572	1:27550849..27551572	DJ159A19.3	753807_1	0.111	7.733	0.14	7.733
1	27622952	27645828	1:27622952..27645828	FGR	347751_1	0.009	8.975	0.33	8.975
1	27680120	27680929	1:27680120..27680929	G1P3	324912_1	-0.301	11.894	-1.264	11.894
1	27846035	27846796	1:27846035..27846796	PPP1R8	346282_1	0.004	11.93	0.426	11.93
1	27894050	27897326	1:27894050..27897326	C1orf38	270510_1	-0.618	8.498	-0.554	8.498
1	27945717	27969598	1:27945717..27969598	SMPDL3B	321949_1	0.331	10.111	-0.191	10.111
1	28097557	28098281	1:28097557..28098281	EYA3	280365_1	-0.926	10.223	-0.195	10.223
1	28157822	28158758	1:28157822..28158758	PTAFR	145797_1	0.076	7.796	0.376	7.796
1	28246752	28248753	1:28246752..28248753	ATPIF1	344727_1	0.283	13.314	0.337	13.314
1	28339690	28346618	1:28339690..28346618	MED18	1703416_1	0.333	8.448	0.577	8.448
1	28627660	28647436	1:28627660..28647436	PHACTR4	730953_1	0.523	11.668	0.876	11.668
1	28658873	28659725	1:28658873..28659725	CHC1	724615_1	-0.227	8.707	-0.135	8.707
1	28658873	28659725	1:28658873..28659725	CHC1	172731_1	-0.333	9.264	-0.288	9.264
1	28718308	28718702	1:28718308..28718702	SECP43	44284_1	0.265	9.594	0.261	9.594
1	28786648	28787016	1:28786648..28787016	TAF12	221805_1	-0.285	9.983	0.002	9.983
1	28830702	28862731	1:28830702..28862731	GMEB1	129005_1	-0.037	7.923	-0.061	7.923
1	28864313	28865409	1:28864313..28865409		108352_1	0.083	7.632	0.008	7.632
1	28864313	28865409	1:28864313..28865409		1726027_1	0.21	9.167	0.383	9.167
1	28898966	28900486	1:28898966..28900486	YTHDF2	299085_1	1.057	13.685	1.343	13.685
1	28898966	28900486	1:28898966..28900486	YTHDF2	219635_1	1.068	12.47	0.946	12.47
1	28898966	28900486	1:28898966..28900486	YTHDF2	346869_1	-1.8	8.593	-1.683	8.593
1	29200844	29201556	1:29200844..29201556	EPB41	221339_1	-0.269	13.023	-0.506	13.023
1	29200844	29201556	1:29200844..29201556	EPB41	205980_1	-0.056	11.275	-0.33	11.275
1	29324418	29325026	1:29324418..29325026	SFRS4	196848_1	-0.118	12.895	-0.286	12.895
1	29324418	29325026	1:29324418..29325026	SFRS4	135606_1	-0.513	11.249	-0.275	11.249
1	29340103	29378052	1:29340103..29378052	CGI-63	153437_1	-1.531	8.647	-0.463	8.647
1	29383643	29473928	1:29383643..29473928	PTPRU	744800_1	0.186	8.07	0.631	8.07
1	30885757	30886208	1:30885757..30886208	LAPTM5	22589_1	-2.238	8.461	-1.839	8.461
1	31011406	31020682	1:31011406..31020682	SDC3	155761_1	-0.228	7.753	0.014	7.753
1	31328460	31328989	1:31328460..31328989	FLJ12650	1622762_1	0.419	12.124	-0.446	12.124
1	31328460	31328989	1:31328460..31328989	FLJ12650	24338_1	0.005	11.022	-0.05	11.022
1	31417337	31418046	1:31417337..31418046	HPRP8BP	193533_1	-0.437	12.709	-0.811	12.709
1	31417337	31418046	1:31417337..31418046	HPRP8BP	291600_1	0.051	9.134	0.242	9.134
1	31417337	31418046	1:31417337..31418046	HPRP8BP	743085_1	-0.01	7.988	0.075	7.988
1	31474594	31488739	1:31474594..31488739	PS1D	307633_1	-0.083	8.405	-0.256	8.405
1	31752379	31762307	1:31752379..31762307	HCRTR1	40608_1	0.023	7.73	0.122	7.73
1	31794670	31795129	1:31794670..31795129	COL16A1	154608_1	0.017	7.283	0.062	7.283
1	31861810	31863327	1:31861810..31863327	BAI2	42870_1	0.146	8.267	0.543	8.267
1	32051752	32052143	1:32051752..32052143	PTP4A2	50232_1	1.007	13.837	1.441	13.837
1	32295921	32296637	1:32295921..32296637	KPNA6	47696_1	-0.152	7.932	0.175	7.932
1	32332529	32336584	1:32332529..32336584	DKFZp451J0118	42594_1	-0.148	9.069	0.048	9.069
1	32332529	32336584	1:32332529..32336584	DKFZp451J0118	300250_1	-0.054	13.377	1.559	13.377
1	32348643	32355890	1:32348643..32355890	RP4-622L5	297962_1	0.066	7.997	0.103	7.997
1	32365684	32366185	1:32365684..32366185	EIF3S2	2288917_1	-0.113	13.343	-0.298	13.343
1	32365684	32366185	1:32365684..32366185	EIF3S2	42897_1	-0.236	13.048	-0.514	13.048
1	32413673	32414321	1:32413673..32414321	LCK	730410_1	-0.097	7.671	-0.091	7.671
1	32426804	32468320	1:32426804..32468320	HDAC1	814080_1	0.23	9.101	0.118	9.101
1	32497300	32499420	1:32497300..32499420	STK22C	2391690_1	0.263	10.413	-0.12	10.413
1	32499864	32528835	1:32499864..32528835	FLJ10276	1561589_1	0.066	7.645	0.001	7.645
1	32783665	32784281	1:32783665..32784281	ARCH	756816_1	-0.227	12.692	-0.51	12.692
1	32785928	32815347	1:32785928..32815347	SYNCOILIN	112525_1	-0.259	9.6	-0.459	9.6
1	32888712	32909664	1:32888712..32909664	KIAA1522	163171_1	1.268	10.796	1.38	10.796
1	32920590	32921032	1:32920590..32921032	YARS	33689_1	-0.796	10.639	-1.144	10.639
1	32986512	32987019	1:32986512..32987019	FLJ12903	149287_1	-0.2	11.465	-0.175	11.465
1	33023570	33029340	1:33023570..33029340	HPCA	39899_1	-0.041	7.971	0.191	7.971
1	33071149	33099507	1:33071149..33099507	IBRDC3	1854752_1	0.031	7.446	0.101	7.446
1	33121768	33167163	1:33121768..33167163		1644171_1	-0.068	8.939	0.619	8.939
1	33163759	33163995	1:33163759..33163995	AK2	341660_1	-0.566	9.02	0.476	9.02
1	33219318	33219940	1:33219318..33219940	ODC-p	158272_1	0.533	10.452	-0.114	10.452
1	33297613	33300992	1:33297613..33300992	TRIM62	2313809_1	0.094	8	0.03	8
1	33409900	33434866	1:33409900..33434866	FLJ25476	774646_2	-2.652	9.3	-1.161	9.3
1	33409900	33434866	1:33409900..33434866	FLJ25476	774646_3	-2.928	9.679	-1.381	9.679
1	33409900	33434866	1:33409900..33434866	FLJ25476	774646_1	-2.879	9.72	-1.407	9.72
1	33449388	33449517	1:33449388..33449517	PHC2	742672_1	0.02	7.716	0.314	7.716
1	33607351	33631088	1:33607351..33631088	ZNF31	2304809_1	-0.051	7.529	0.03	7.529
1	33956355	33957011	1:33956355..33957011	LOC127540	1839755_1	-0.02	7.664	0.028	7.664
1	34312363	34353825	1:34312363..34353825	MGC15882	1525744_1	-0.018	7.655	-0.031	7.655
1	34889740	34893206	1:34889740..34893206	GJB5	752746_1	0.111	7.937	0.038	7.937
1	34919486	34921058	1:34919486..34921058	GJB3	756760_1	0.069	7.77	0.104	7.77
1	34927704	34930441	1:34927704..34930441	GJA4	37231_1	-0.344	9.156	-0.214	9.156
1	34985387	34986249	1:34985387..34986249		205153_1	0.069	8.113	-0.277	8.113
1	34989747	34993763	1:34989747..34993763	LOC113444	143529_1	0.268	9.866	0.33	9.866
1	35573235	35692097	1:35573235..35692097	PKD1-like	127678_1	-0.313	11.291	-0.551	11.291
1	35766176	35766615	1:35766176..35766615	PSMB2	771256_1	-0.501	10.804	0.133	10.804
1	35848569	35853883	1:35848569..35853883	FLJ38984	770380_1	0.325	8.261	0.122	8.261
1	35870910	35904644	1:35870910..35904644	CLSPN	53147_1	-0.175	9.396	-0.222	9.396
1	35963652	35964019	1:35963652..35964019	EIF2C4	1736291_1	0.166	8.157	0.182	8.157
1	36060525	36064303	1:36060525..36064303	EIF2C1	35570_1	-0.206	8.975	-0.173	8.975
1	36060525	36064303	1:36060525..36064303	EIF2C1	43829_1	-0.046	11.242	-0.537	11.242
1	36196274	36197049	1:36196274..36197049		1557298_1	0.032	8.299	0.081	8.299
1	36214766	36215346	1:36214766..36215346		281580_1	0.358	8.942	0.104	8.942
1	36214766	36215346	1:36214766..36215346		1754935_1	0.769	9.289	0.218	9.289
1	36214766	36215346	1:36214766..36215346		1526359_1	-0.007	7.442	0.002	7.442
1	36223568	36228626	1:36223568..36228626	ADPRHL2	310106_1	0.589	10.381	1.632	10.381
1	36276526	36277080	1:36276526..36277080	TRAPPC3	429286_1	0.033	10.552	0.265	10.552
1	36429984	36430271	1:36429984..36430271	THRAP3	2383518_2	0.02	7.651	0.1	7.651
1	36429984	36430271	1:36429984..36430271	THRAP3	2383518_1	-0.013	7.361	0.084	7.361
1	36457300	36458321	1:36457300..36458321	FLJ10647	2065701_1	0.24	7.962	0.122	7.962
1	36519189	36519639	1:36519189..36519639	MGC4796	730021_1	-0.561	8.84	-0.553	8.84
1	36519189	36519639	1:36519189..36519639	MGC4796	141405_1	0.072	7.682	0.051	7.682
1	36528752	36530017	1:36528752..36530017	LSM10	308500_1	-0.166	8.898	0.197	8.898
1	36556149	36556623	1:36556149..36556623	NOR1	1839911_1	0.878	8.36	0.581	8.36
1	36613529	36614042	1:36613529..36614042	CSF3R	134369_1	0.01	9.549	-0.146	9.549
1	36930225	36930998	1:36930225..36930998		49391_1	0.543	8.24	0.113	8.24
1	37613774	37614203	1:37613774..37614203	FLJ23231	429621_1	0.205	8.338	0.095	8.338
1	37624459	37625155	1:37624459..37625155		1733625_1	0.487	8.668	0.362	8.668
1	37627268	37649457	1:37627268..37649457	FLJ11730	770983_1	0.471	11.056	0.561	11.056
1	37695231	37701550	1:37695231..37701550	DNALI1	782688_1	0.222	9.424	0.089	9.424
1	37695231	37701550	1:37695231..37701550	DNALI1	298583_1	1.321	8.572	0.571	8.572
1	37695231	37701550	1:37695231..37701550	DNALI1	35498_1	2.64	8.768	0.561	8.768
1	37701510	37705587	1:37701510..37705587	GNL2	783629_1	-0.339	11.972	-0.321	11.972
1	37848652	37887667	1:37848652..37887667	EPHA10	1391608_1	0.114	7.752	0.133	7.752
1	37937709	37940370	1:37937709..37940370	FLJ23476	364596_1	-0.19	10.224	-0.426	10.224
1	37980745	37981160	1:37980745..37981160	MTF1	160377_1	0.987	8.755	0.433	8.755
1	37980745	37981160	1:37980745..37981160	MTF1	241856_1	0.202	8.272	0.076	8.272
1	38092291	38125686	1:38092291..38125686	SF3A3	31866_1	-0.533	11.334	-0.026	11.334
1	38131534	38140270	1:38131534..38140270	FHL3	796475_1	0.292	9.561	0.411	9.561
1	38996882	38997473	1:38996882..38997473		137527_1	0.058	7.619	0.025	7.619
1	39002880	39003359	1:39002880..39003359	MYCBP	257600_1	0.345	11.172	0.292	11.172
1	39020570	39034985	1:39020570..39034985	RHBDL2	1562618_1	0.124	8.035	0.141	8.035
1	39020570	39034985	1:39020570..39034985	RHBDL2	278829_1	0.32	8.57	-0.036	8.57
1	39166858	39167492	1:39166858..39167492	NDUFS5	742651_1	0.418	12.186	0.192	12.186
1	39650503	39654900	1:39650503..39654900	OXCT2	1409412_1	-0.662	10.386	-0.659	10.386
1	39661423	39664636	1:39661423..39664636	FLJ14351	744943_1	-0.074	8.556	-0.35	8.556
1	39695584	39699291	1:39695584..39699291	PABPC4	23838_1	-0.748	10.353	-0.102	10.353
1	39813412	39815875	1:39813412..39815875	HPCAL4	280270_1	1.027	11.935	-0.011	11.935
1	39887707	39888471	1:39887707..39888471	PPIE	470697_1	-0.319	9.638	-0.348	9.638
1	39892995	39923626	1:39892995..39923626	BMP8B	1032431_1	-0.118	8.433	-0.078	8.433
1	39975820	40018270	1:39975820..40018270	TRIT1	257271_1	-0.717	10.575	-1.185	10.575
1	40030194	40036927	1:40030194..40036927	MYCL1	138917_1	-0.635	7.928	-0.477	7.928
1	40098975	40104733	1:40098975..40104733	FLJ14490	144059_1	0.483	8.092	0.118	8.092
1	40207476	40232015	1:40207476..40232015	PPT1	24177_1	1.306	13.411	2.489	13.411
1	40322758	40323236	1:40322758..40323236	RLF	41345_1	0.303	11.863	-0.11	11.863
1	40322758	40323236	1:40322758..40323236	RLF	130398_1	-0.035	7.944	-0.794	7.944
1	40386045	40386453	1:40386045..40386453	dJ39G22.2	758214_1	0.13	7.566	0.081	7.566
1	40391590	40392732	1:40391590..40392732		303168_1	0.33	9.629	-0.518	9.629
1	40435287	40452153	1:40435287..40452153	COL9A2	1894508_1	-0.063	7.677	-0.013	7.677
1	40524524	40525253	1:40524524..40525253	LOC64744	243736_1	-0.158	9.678	-0.073	9.678
1	40524524	40525253	1:40524524..40525253	LOC64744	111437_1	-0.12	7.471	-0.008	7.471
1	40599083	40601529	1:40599083..40601529		37743_1	0.384	8.884	-0.196	8.884
1	40768094	40768642	1:40768094..40768642	RIMS3	175846_1	0.439	8.514	0.336	8.514
1	40768094	40768642	1:40768094..40768642	RIMS3	2277543_1	0.445	11.505	0.667	11.505
1	40850428	40850961	1:40850428..40850961	NFYC	723939_1	-0.239	9.819	0.483	9.819
1	40922932	40923493	1:40922932..40923493	KCNQ4	158260_1	0.387	10.645	-0.172	10.645
1	41115349	41118144	1:41115349..41118144	CTPS	47480_1	-1.294	9.611	-1.09	9.611
1	41150361	41158002	1:41150361..41158002	FLJ23878	281565_1	-1.395	8.344	-1.204	8.344
1	41214312	41214903	1:41214312..41214903	SCMH1	49573_1	-0.115	8.192	-0.045	8.192
1	41214312	41214903	1:41214312..41214903	SCMH1	724014_1	-0.02	8.653	-0.044	8.653
1	41377137	41399322	1:41377137..41399322		1733284_1	-0.025	7.404	0.039	7.404
1	41613538	41619390	1:41613538..41619390	EDN2	1693357_1	0.021	7.66	0.273	7.66
1	41641354	41642367	1:41641354..41642367		343149_1	0.067	8.983	0.101	8.983
1	41675967	41676478	1:41675967..41676478	HIVEP3	282787_1	0.215	9.405	0.135	9.405
1	41675967	41676478	1:41675967..41676478	HIVEP3	1287882_1	-0.289	7.409	-0.263	7.409
1	41675967	41676478	1:41675967..41676478	HIVEP3	745941_1	0.679	7.782	0.145	7.782
1	42289449	42290589	1:42289449..42290589	GUCA2B	2333984_1	0.011	7.529	0.056	7.529
1	42515574	42549943	1:42515574..42549943	MGC47816	29128_1	0.238	8	0.217	8
1	42555744	42556589	1:42555744..42556589		795397_1	0.101	7.62	0.072	7.62
1	42803326	42803823	1:42803326..42803823	PPIH	767277_1	-0.039	7.344	-0.091	7.344
1	42817205	42831503	1:42817205..42831503		949932_1	-0.076	11.847	-0.177	11.847
1	42894749	42901796	1:42894749..42901796	LEPRE1	148187_1	-0.853	8.784	-0.889	8.784
1	42902060	42910270	1:42902060..42910270	MGC955	322193_1	0.049	10.488	-0.093	10.488
1	42941931	42952049	1:42941931..42952049	LOC374969	206203_1	0.808	9.67	-0.02	9.67
1	42941931	42952049	1:42941931..42952049	LOC374969	194723_1	0.735	8.854	0.481	8.854
1	42977538	42977682	1:42977538..42977682	ERMAP	1240160_1	-0.207	8.798	-0.071	8.798
1	42981381	42983433	1:42981381..42983433	LOC51058	45128_1	-0.194	8.593	-0.197	8.593
1	43089247	43089694	1:43089247..43089694	SLC2A1	151248_1	0.033	8.644	-0.057	8.644
1	43133906	43134584	1:43133906..43134584		321903_1	-0.05	7.467	0.025	7.467
1	43299068	43299365	1:43299068..43299365	EBNA1BP2	22918_1	0.302	12.507	-0.086	12.507
1	43435756	43457872	1:43435756..43457872	TIE1	41094_1	-0.066	7.737	0.032	7.737
1	43492369	43492887	1:43492369..43492887		1964738_1	-0.32	12.175	-0.535	12.175
1	43493755	43495518	1:43493755..43495518		898062_1	1.035	8.841	0.759	8.841
1	43498167	43500336	1:43498167..43500336	CDC20	129381_1	-0.794	9.469	-0.356	9.469
1	43521363	43523197	1:43521363..43523197	MED8	2150134_1	-0.353	10.988	-0.754	10.988
1	43521363	43523197	1:43521363..43523197	MED8	505546_1	1.074	12.052	1.032	12.052
1	43686356	43686887	1:43686356..43686887	PTPRF	121287_1	0.378	9.522	0.154	9.522
1	43686356	43686887	1:43686356..43686887	PTPRF	47755_1	0.86	10.396	0.554	10.396
1	43784930	43840231	1:43784930..43840231	JMJD2A	191600_1	0.081	8.931	-0.047	8.931
1	44081703	44102786	1:44081703..44102786	IPO13	126461_1	0.108	8.135	0.02	8.135
1	44109735	44113060	1:44109735..44113060	ATP6V0B	810725_1	0.479	7.854	0.122	7.854
1	44117017	44117463	1:44117017..44117463	B4GALT2	300300_1	0.025	8.354	0.213	8.354
1	44307510	44308000	1:44307510..44308000		22836_1	0.053	7.882	0.017	7.882
1	44362047	44362801	1:44362047..44362801	PRNPIP	47060_1	0.357	8.384	0.412	8.384
1	44788015	44809207	1:44788015..44809207	FLJ22353	323520_1	-0.149	13.173	-0.714	13.173
1	44809477	44859161	1:44809477..44859161	MGC33556	2231443_1	0.456	11.956	0.505	11.956
1	44874643	44902509	1:44874643..44902509	KIF2C	742798_1	-0.063	8.014	-0.048	8.014
1	44910797	44913446	1:44910797..44913446	RPS8	971367_1	0.155	9.274	-0.406	9.274
1	44934989	44940673	1:44934989..44940673	PLK3	52216_1	-0.133	7.719	-0.121	7.719
1	44943360	44949322	1:44943360..44949322	LOC149478	306466_1	-0.282	8.253	-0.287	8.253
1	44957030	44977701	1:44957030..44977701	PTCH2	1391335_1	0.22	7.903	-0.094	7.903
1	45047058	45047688	1:45047058..45047688	EIF2B3	110863_1	-0.282	10.155	-0.553	10.155
1	45137312	45140667	1:45137312..45140667	FLJ21156	182945_1	-0.551	10.47	-0.011	10.47
1	45147016	45150340	1:45147016..45150340	UROD	760148_1	-0.078	7.963	-0.129	7.963
1	45339898	45340404	1:45339898..45340404	ZSWIM5	1584811_1	0.596	8.314	0.823	8.314
1	45339898	45340404	1:45339898..45340404	ZSWIM5	45519_1	0.024	11.166	-0.077	11.166
1	45461669	45463298	1:45461669..45463298	MGC15668	2307288_1	-0.168	7.757	-0.197	7.757
1	45464006	45475153	1:45464006..45475153	MUTYH	268727_1	0.089	7.55	0.097	7.55
1	45474985	45478729	1:45474985..45478729	TOE1	321801_1	-0.08	9.23	-0.413	9.23
1	45733058	45733709	1:45733058..45733709	NASP	1709587_1	-0.237	9.233	-0.375	9.233
1	45733058	45733709	1:45733058..45733709	NASP	207867_1	-0.267	11.01	-0.481	11.01
1	45733058	45733709	1:45733058..45733709	NASP	1639086_1	-0.012	7.896	0.2	7.896
1	45754808	45758802	1:45754808..45758802	FLJ33084	123459_1	-0.26	12.179	-0.68	12.179
1	45833472	45834957	1:45833472..45834957	IPP	279557_1	-0.008	10.592	-0.322	10.592
1	46189324	46189949	1:46189324..46189949	MAST2	267805_1	0.027	7.532	0.014	7.532
1	46189324	46189949	1:46189324..46189949	MAST2	40173_1	0.362	8.62	0.368	8.62
1	46308402	46308872	1:46308402..46308872	PIK3R3	1751625_1	-0.028	7.472	0.05	7.472
1	46308402	46308872	1:46308402..46308872	PIK3R3	1639605_1	0.16	8.326	-0.087	8.326
1	46308402	46308872	1:46308402..46308872	PIK3R3	42263_1	1.487	10.344	1.155	10.344
1	46366378	46368666	1:46366378..46368666	FLJ20277	302011_1	0.362	8.616	0.423	8.616
1	46455153	46455463	1:46455153..46455463	RAD54L	2156307_1	0.535	12.11	0.515	12.11
1	46456095	46477316	1:46456095..46477316	MUF1	1839996_1	-0.137	7.78	-0.143	7.78
1	46482436	46482985	1:46482436..46482985	UQCRH	297479_1	-0.793	13.081	-0.837	13.081
1	46527356	46528072	1:46527356..46528072	NSUN4	129626_1	0.048	9.713	0.066	9.713
1	46527356	46528072	1:46527356..46528072	NSUN4	129019_1	-0.013	9.468	-0.054	9.468
1	46572011	46591537	1:46572011..46591537	FAAH	782217_1	0.217	7.731	-0.002	7.731
1	46712656	46713194	1:46712656..46713194		742566_1	0.104	7.623	0.136	7.623
1	46763709	46764327	1:46763709..46764327	MKNK1	773637_1	0.334	8.741	0.122	8.741
1	46812734	46846050	1:46812734..46846050	ATPAF1	47558_1	-0.427	11.087	0.085	11.087
1	46890931	46891654	1:46890931..46891654	KIAA0494	34288_1	0.682	10.426	0.974	10.426
1	46976761	46997105	1:46976761..46997105	CYP4B1	724888_1	-0.047	8.767	0.216	8.767
1	47106865	47119437	1:47106865..47119437	CYP4A11	120466_1	1.001	9.558	0.225	9.558
1	47245066	47296010	1:47245066..47296010	CYP4Z1	214307_1	0.008	10.53	-0.186	10.53
1	47245066	47296010	1:47245066..47296010	CYP4Z1	161526_1	1.06	7.834	0.138	7.834
1	47393983	47407463	1:47393983..47407463	TAL1	199945_1	-0.054	7.5	-0.015	7.5
1	47393983	47407463	1:47393983..47407463	TAL1	71727_1	-0.113	7.304	-0.029	7.304
1	47511614	47556527	1:47511614..47556527	UMP-CMPK	140570_1	0.313	11.8	0.245	11.8
1	47593763	47595744	1:47593763..47595744	FOXE3	744627_1	0.066	7.709	0.06	7.709
1	48066534	48067108	1:48066534..48067108		742574_1	0.049	7.954	0.035	7.954
1	48066534	48067108	1:48066534..48067108		744933_1	-0.153	9.1	0.173	9.1
1	48251256	48251590	1:48251256..48251590		1520887_1	0.04	7.962	0.101	7.962
1	49352505	49365277	1:49352505..49365277		1620034_1	-0.023	10.264	-0.282	10.264
1	50377316	50377935	1:50377316..50377935	ELAVL4	40618_1	0.016	7.917	-0.02	7.917
1	51008353	51008601	1:51008353..51008601	FAF1	51260_1	0.238	7.798	0.156	7.798
1	51146603	51147384	1:51146603..51147384	CDKN2C	291057_1	-0.869	10.198	-0.342	10.198
1	51444205	51444730	1:51444205..51444730	RNF11	22054_1	1.261	11.473	0.937	11.473
1	51555985	51556719	1:51555985..51556719	EPS15	753976_1	0.372	11.143	0.672	11.143
1	51555985	51556719	1:51555985..51556719	EPS15	143973_1	-0.033	8.502	-0.196	8.502
1	51937316	51966145	1:51937316..51966145	OSBPL9	38596_1	-1.584	11.136	-1.084	11.136
1	51937316	51966145	1:51937316..51966145	OSBPL9	112017_1	-0.006	13.055	-0.191	13.055
1	52085648	52088362	1:52085648..52088362	RAB3B	143705_1	-0.242	9.843	-0.426	9.843
1	52085648	52088362	1:52085648..52088362	RAB3B	147127_1	-0.165	12.382	-0.328	12.382
1	52228196	52228654	1:52228196..52228654	MGC20419	23408_1	0.007	10.216	-0.38	10.216
1	52234042	52266112	1:52234042..52266112	MGC23908	127807_1	-0.3	10.732	-0.5	10.732
1	52475325	52477805	1:52475325..52477805	ZFYVE9	505501_1	-0.368	9.374	0.321	9.374
1	52528287	52538725	1:52528287..52538725	KIAA1836	757711_1	-0.115	8.675	0.089	8.675
1	52550521	52582152	1:52550521..52582152	ORC1L	121313_1	-0.308	11.254	-0.587	11.254
1	52582256	52595871	1:52582256..52595871	FLJ14936	25678_1	-0.592	10.816	-0.997	10.816
1	52622881	52623364	1:52622881..52623364	ZCCHC11	159441_1	-0.896	8.575	-0.648	8.575
1	52622881	52623364	1:52622881..52623364	ZCCHC11	2461597_1	-0.616	8.399	-0.499	8.399
1	52922548	52922983	1:52922548..52922983	FLJ13456	234694_1	0.03	8.205	-0.093	8.205
1	53094072	53094567	1:53094072..53094567	ECHDC2	198208_1	0.048	8.031	-0.088	8.031
1	53094072	53094567	1:53094072..53094567	ECHDC2	2455329_1	-0.198	12.197	-0.5	12.197
1	53177697	53178250	1:53177697..53178250	SCP2	855395_1	-1.829	8.957	-1.099	8.957
1	53264875	53320270	1:53264875..53320270	SLC1A7	276515_1	1.03	12.178	0.037	12.178
1	53388148	53391564	1:53388148..53391564	FLJ20580	134213_1	-1.363	10.08	-0.769	10.08
1	53388148	53391564	1:53388148..53391564	FLJ20580	38070_1	-0.203	13.31	-0.238	13.31
1	53416302	53420476	1:53416302..53420476	LRP8	137995_1	-1.101	9.979	-0.491	9.979
1	53615596	53616073	1:53615596..53616073		1838913_1	0.016	7.595	0.043	7.595
1	53637092	53645179	1:53637092..53645179	DMRTB1	1644949_1	-0.026	7.434	0.023	7.434
1	53773412	53775074	1:53773412..53775074	GLIS1	280291_1	0.114	7.875	0.11	7.875
1	53962019	53962277	1:53962019..53962277	FLJ10407	27569_1	0.016	11.926	0.769	11.926
1	54029426	54067474	1:54029426..54067474	DJ167A19.1	108417_1	0.462	9.903	1.356	9.903
1	54123770	54145857	1:54123770..54145857	MGC8974	240637_1	0.213	10.505	0.034	10.505
1	54376324	54376772	1:54376324..54376772		2445491_1	-0.312	14.533	-0.636	14.533
1	54392808	54393401	1:54392808..54393401	MRPL37	36356_1	0.314	8.892	-0.342	8.892
1	54725932	54816383	1:54725932..54816383	THEA	1704574_2	0.07	7.637	0.112	7.637
1	54725932	54816383	1:54725932..54816383	THEA	1704574_3	0.086	7.653	0.202	7.653
1	54725932	54816383	1:54725932..54816383	THEA	1704574_4	-0.051	7.692	0.095	7.692
1	54725932	54816383	1:54725932..54816383	THEA	1704574_1	0.025	8.332	-0.075	8.332
1	54820717	54821186	1:54820717..54821186	FLJ46354	757848_1	0.088	7.494	0.016	7.494
1	54893515	54920351	1:54893515..54920351	TTC4	3462738_1	-0.485	9.73	-0.33	9.73
1	54934591	54942208	1:54934591..54942208	DKFZp727A071	121478_1	0.023	8.32	-0.212	8.32
1	54959289	54965689	1:54959289..54965689	FLJ20619	235070_1	-0.292	10.622	-0.761	10.622
1	54959289	54965689	1:54959289..54965689	FLJ20619	305834_1	-0.045	7.795	-0.116	7.795
1	55027569	55028310	1:55027569..55028310	DHCR24	840878_1	1.185	10.814	0.863	10.814
1	55176637	55186482	1:55176637..55186482	BSND	1901156_1	-0.105	7.66	-0.006	7.66
1	56093302	56099107	1:56093302..56099107		757936_1	0.052	7.355	0.041	7.355
1	56323185	56323757	1:56323185..56323757		150937_1	0.06	7.633	0.135	7.633
1	56737266	56737632	1:56737266..56737632	PPAP2B	247806_1	-1.927	9.682	-2.699	9.682
1	57032499	57095915	1:57032499..57095915	C8A	416890_1	0.048	7.705	0.027	7.705
1	58706527	58707306	1:58706527..58707306	OMA1	152942_1	-0.034	8.125	-0.04	8.125
1	58752663	58755466	1:58752663..58755466	TACSTD2	809938_1	-0.291	7.8	0.472	7.8
1	58864133	58864334	1:58864133..58864334	KIAA1915	248396_1	0.536	9.972	-0.067	9.972
1	58864133	58864334	1:58864133..58864334	KIAA1915	2105869_1	0.153	8.09	0.145	8.09
1	58958481	58958962	1:58958481..58958962	JUN	358531_2	-0.205	9.715	-0.231	9.715
1	58958481	58958962	1:58958481..58958962	JUN	358531_1	-0.412	8.472	-0.851	8.472
1	59198168	59210826	1:59198168..59210826		1854409_1	-0.013	7.493	-0.014	7.493
1	59309840	59324420	1:59309840..59324420		728527_1	0.049	7.546	0.038	7.546
1	59678009	59678365	1:59678009..59678365	FLJ10986	187119_1	0.457	8.844	-0.079	8.844
1	59678009	59678365	1:59678009..59678365	FLJ10986	243839_1	-0.001	7.536	0.001	7.536
1	59992553	60050689	1:59992553..60050689	HOOK1	309209_1	1.074	10.52	0.873	10.52
1	59992553	60050689	1:59992553..60050689	HOOK1	113403_1	0.147	8.25	0.078	8.25
1	60071008	60090931	1:60071008..60090931	CYP2J2	213040_1	0.567	9.037	1.899	9.037
1	61118872	61148469	1:61118872..61148469		279144_1	-0.007	7.41	-0.015	7.41
1	61380214	61380932	1:61380214..61380932	NFIA	126559_1	0.055	7.792	0.002	7.792
1	61380214	61380932	1:61380214..61380932	NFIA	241658_1	-0.227	8.318	-0.048	8.318
1	61380214	61380932	1:61380214..61380932	NFIA	40175_1	-2.224	9.205	-0.308	9.205
1	61831938	61833230	1:61831938..61833230	MGC34796	1645270_1	0.156	8.135	0.165	8.135
1	61858739	61903116	1:61858739..61903116	BBP	1874360_1	0.006	9.174	-0.159	9.174
1	62131703	62132373	1:62131703..62132373	INADL	928207_1	0.01	7.574	0.011	7.574
1	62131703	62132373	1:62131703..62132373	INADL	2208054_1	0.41	11.921	0.47	11.921
1	62131703	62132373	1:62131703..62132373	INADL	279019_1	1.578	9.939	1.002	9.939
1	62131703	62132373	1:62131703..62132373	INADL	193882_1	-0.327	9.722	-0.042	9.722
1	62131703	62132373	1:62131703..62132373	INADL	755606_1	-0.865	10.511	-0.931	10.511
1	62131703	62132373	1:62131703..62132373	INADL	2281527_1	0.589	12.198	0.498	12.198
1	62131703	62132373	1:62131703..62132373	INADL	248478_1	-0.242	13.065	-0.254	13.065
1	62431269	62431691	1:62431269..62431691	LOC163782	194289_1	-0.587	8.152	-0.434	8.152
1	62611515	62612256	1:62611515..62612256		1603337_1	0.113	7.584	-0.038	7.584
1	62614699	62629430	1:62614699..62629430	USP1	1581685_1	-0.529	10.253	-1.159	10.253
1	62632704	62764247	1:62632704..62764247	DOCK7	50983_1	0.609	7.85	0.11	7.85
1	62961826	63042844	1:62961826..63042844	APG4C	174681_1	0.006	8.865	-0.376	8.865
1	63400576	63439493	1:63400576..63439493	LOC199899	1408855_1	0.077	7.791	0.132	7.791
1	63630305	63631075	1:63630305..63631075	ITGB3BP	345200_1	-0.206	9.057	-0.627	9.057
1	63630305	63631075	1:63630305..63631075	ITGB3BP	729310_1	0.189	11.176	-0.404	11.176
1	63729908	63730624	1:63729908..63730624	KIAA1799	743195_1	1.294	9.864	0.11	9.864
1	63729908	63730624	1:63729908..63730624	KIAA1799	270136_1	-0.549	9.443	-0.615	9.443
1	63729908	63730624	1:63729908..63730624	KIAA1799	221784_1	0.134	7.656	0.137	7.656
1	64075715	64076196	1:64075715..64076196	ROR1	327179_1	-0.126	7.841	-0.366	7.841
1	64357331	64359202	1:64357331..64359202		307313_1	-0.31	8.048	-0.487	8.048
1	64423348	64423978	1:64423348..64423978		136344_1	0.082	7.745	0.135	7.745
1	64714332	64714980	1:64714332..64714980	KIAA1573	111844_1	-0.047	7.547	-0.001	7.547
1	64714332	64714980	1:64714332..64714980	KIAA1573	201030_1	0.051	7.529	0.016	7.529
1	65020115	65020585	1:65020115..65020585	JAK1	156832_1	0.02	8.018	-0.17	8.018
1	65020115	65020585	1:65020115..65020585	JAK1	713193_1	0.189	7.846	0.156	7.846
1	65407331	65409840	1:65407331..65409840	AK3	209735_1	0.032	10.728	-0.032	10.728
1	65743269	65813132	1:65743269..65813132	LEPR	296229_1	0.131	10.296	-0.034	10.296
1	65743269	65813132	1:65743269..65813132	LEPR	2446045_1	0.04	14.14	-0.021	14.14
1	66210958	66211418	1:66210958..66211418	PDE4B	249620_1	0.014	7.529	0.045	7.529
1	66210958	66211418	1:66210958..66211418	PDE4B	273421_1	0.318	8.76	0.512	8.76
1	66814052	66814760	1:66814052..66814760	DKFZp761D221	2451743_1	0.118	12.014	0.074	12.014
1	66952749	66953277	1:66952749..66953277	FLJ40873	289525_1	0.358	7.858	0.084	7.858
1	66990594	67083007	1:66990594..67083007	FLJ23129	1525798_1	-0.224	7.779	-0.158	7.779
1	67128253	67128711	1:67128253..67128711	MI-ER1	53031_1	-0.261	11.04	-0.331	11.04
1	67230922	67231336	1:67230922..67231336	SLC35D1	301380_1	-0.018	7.795	-0.153	7.795
1	67299308	67299771	1:67299308..67299771		1644982_1	-0.025	7.723	-0.02	7.723
1	67347952	67348412	1:67347952..67348412	IL23R	2208577_1	0.552	10.578	0.338	10.578
1	67514183	67514986	1:67514183..67514986	IL12RB2	1587390_1	0.074	7.794	0.068	7.794
1	67514183	67514986	1:67514183..67514986	IL12RB2	123805_1	-0.028	7.927	0.022	7.927
1	67594172	67594404	1:67594172..67594404	PAI-RBP1	320296_1	-0.589	10.264	-0.162	10.264
1	67862927	67863801	1:67862927..67863801	GADD45A	310141_1	-0.225	10.677	-1.709	10.677
1	67966455	67967169	1:67966455..67967169	GNG12	203529_1	-1.1	10.591	-0.852	10.591
1	67966455	67967169	1:67966455..67967169	GNG12	147355_1	-0.341	8.278	-0.062	8.278
1	68223667	68229335	1:68223667..68229335	ARHI	46531_1	-0.17	7.714	-0.022	7.714
1	68296706	68302702	1:68296706..68302702		341659_1	0.194	9.028	-0.254	9.028
1	68331769	68332256	1:68331769..68332256	FLJ23091	382649_1	-3.95	9.704	-1.448	9.704
1	68652958	68674728	1:68652958..68674728	DEPDC1	645565_1	0.146	9.552	-0.112	9.552
1	70352606	70353059	1:70352606..70353059	FLJ20331	29258_1	0.135	12.639	-0.16	12.639
1	70390760	70391413	1:70390760..70391413	SFRS11	111549_1	0.026	8.467	-0.204	8.467
1	70390760	70391413	1:70390760..70391413	SFRS11	210715_1	-0.12	11.181	-0.649	11.181
1	70390760	70391413	1:70390760..70391413	SFRS11	204755_1	-0.252	8.452	-0.502	8.452
1	70390760	70391413	1:70390760..70391413	SFRS11	1908944_1	-0.221	8.248	0.014	8.248
1	70390760	70391413	1:70390760..70391413	SFRS11	491747_1	0.381	12.636	0.222	12.636
1	70390760	70391413	1:70390760..70391413	SFRS11	1390404_1	0.004	7.445	0.015	7.445
1	70494925	70495664	1:70494925..70495664	DKFZP566D1346	276750_1	0.59	8.775	0.234	8.775
1	70532538	70532813	1:70532538..70532813	HHLA3	713631_1	0.346	10.693	0.536	10.693
1	70588975	70617664	1:70588975..70617664	CTH	214460_1	-0.172	12.804	-0.316	12.804
1	70588975	70617664	1:70588975..70617664	CTH	126795_1	-0.408	8.483	-0.303	8.483
1	71183557	71184206	1:71183557..71184206	PTGER3	1535449_1	-0.298	10.443	-0.74	10.443
1	71183557	71184206	1:71183557..71184206	PTGER3	753211_1	0.155	8.506	0.838	8.506
1	71418557	71419276	1:71418557..71419276		233658_1	-0.283	9.425	-0.441	9.425
1	72366857	72367386	1:72366857..72367386	NEGR1	281992_1	-0.159	8.203	-0.001	8.203
1	73484869	73516581	1:73484869..73516581		743304_1	0.017	7.472	0.077	7.472
1	74203945	74375849	1:74203945..74375849	MGC22773	293431_1	0.246	9.352	-0.118	9.352
1	74385823	74389766	1:74385823..74389766	FPGT	22883_1	0.681	8.625	0.486	8.625
1	74539594	74540318	1:74539594..74540318	TNNI3K	2091174_1	0.088	7.804	-0.01	7.804
1	74748821	74851443	1:74748821..74851443	DKFZp547I048	43065_1	0.058	7.553	-0.016	7.553
1	74883192	74886532	1:74883192..74886532	CRYZ	471763_1	0.967	10.762	-0.411	10.762
1	75903560	75903902	1:75903560..75903902	ACADM	298155_1	-0.354	11.055	-0.245	11.055
1	75963902	75972539	1:75963902..75972539	RABGGTB	26949_1	-0.099	12.312	-0.223	12.312
1	75977786	75978326	1:75977786..75978326	MSH4	1461158_1	-0.006	7.582	0.037	7.582
1	77110930	77111488	1:77110930..77111488	SIAT7E	52606_1	-0.018	7.589	-0.142	7.589
1	77110930	77111488	1:77110930..77111488	SIAT7E	42035_1	-0.214	8.895	-0.422	8.895
1	77266695	77397136	1:77266695..77397136	PIGK	33372_1	0.834	9.872	-0.189	9.872
1	77933994	77934471	1:77933994..77934471	USP33	504804_1	0.668	10.914	-0.124	10.914
1	78095833	78121597	1:78095833..78121597	NEXN	1622707_1	-0.305	11.689	-0.698	11.689
1	78182656	78195019	1:78182656..78195019	DNAJB4	789269_1	-0.594	9.204	-1.151	9.204
1	78182656	78195019	1:78182656..78195019	DNAJB4	131100_1	-0.256	8.597	-0.39	8.597
1	78306888	78307600	1:78306888..78307600	GIPC2	1867454_1	-0.603	7.963	-0.324	7.963
1	78306888	78307600	1:78306888..78307600	GIPC2	123354_1	-0.046	7.673	-0.086	7.673
1	78803375	78820110	1:78803375..78820110	IFI44L	2190777_1	0.28	9.009	0.145	9.009
1	79083877	79084595	1:79083877..79084595	ELTD1	345051_1	0.08	8.174	0.08	8.174
1	81483865	81877514	1:81483865..81877514		1544154_1	0.047	7.644	-0.015	7.644
1	81691585	81735408	1:81691585..81735408		1523202_1	0.174	7.643	0.077	7.643
1	83623757	83632475	1:83623757..83632475	ENTPD6	22795_1	-0.072	10.855	-0.082	10.855
1	83624016	83640401	1:83624016..83640401		1056215_1	0.086	7.872	0.057	7.872
1	84047401	84176796	1:84047401..84176796	FLJ23033	190256_1	-0.402	12.189	-0.962	12.189
1	84047401	84176796	1:84047401..84176796	FLJ23033	731174_1	-0.012	10.211	0.02	10.211
1	84279482	84279910	1:84279482..84279910	PRKACB	486136_1	-2.709	9.882	-0.879	9.882
1	84476069	84528500	1:84476069..84528500	LOC148418	2209592_1	0.472	11.334	0.329	11.334
1	84731320	84732220	1:84731320..84732220	SPATA1	138294_1	0.352	8.915	0.501	8.915
1	84821410	84868249	1:84821410..84868249	SSX2IP	46091_2	-0.197	9.238	0.001	9.238
1	84821410	84868249	1:84821410..84868249	SSX2IP	46091_1	0.123	10.703	0.152	10.703
1	84991619	85043843	1:84991619..85043843	EDG7	784200_1	0.303	11.378	0.386	11.378
1	85330198	85331907	1:85330198..85331907		197221_1	-0.17	9.051	-0.202	9.051
1	85427656	85431211	1:85427656..85431211	gm117	154657_1	-0.003	9.711	-0.422	9.711
1	85427656	85431211	1:85427656..85431211	gm117	31034_1	0.144	9.47	0.343	9.47
1	85443954	85455604	1:85443954..85455604		2471142_1	0.135	7.881	-0.155	7.881
1	85455375	85625828	1:85455375..85625828	DDAH1	1651631_1	0.102	8.009	0.079	8.009
1	85455375	85625828	1:85455375..85625828	DDAH1	129307_1	0.096	7.843	-0.059	7.843
1	85455375	85625828	1:85455375..85625828	DDAH1	293726_1	0.214	7.664	-0.02	7.664
1	85644558	85645801	1:85644558..85645801		2384086_1	-0.046	8.395	-0.168	8.395
1	85758479	85761409	1:85758479..85761409	CYR61	378488_1	-1.559	9.314	-1.529	9.314
1	85830511	85886122	1:85830511..85886122	FLJ20729	295480_1	0.187	10.928	-0.467	10.928
1	85906475	86334142	1:85906475..86334142	COL24A1	271665_1	-0.061	7.423	-0.011	7.423
1	86443078	86443752	1:86443078..86443752		1737251_1	0.125	7.958	0.124	7.958
1	86560984	86561336	1:86560984..86561336	KIAA1229	33614_1	0.418	10.825	0.848	10.825
1	86560984	86561336	1:86560984..86561336	KIAA1229	1986218_1	0.391	10.848	0.337	10.848
1	86601888	86634262	1:86601888..86634262	CLCA2	1961418_1	0.18	7.437	0.444	7.437
1	86601888	86634262	1:86601888..86634262	CLCA2	813233_1	-0.005	7.725	-0.052	7.725
1	86912062	86925884	1:86912062..86925884	SH3GLB1	258518_1	0.226	10.156	0.429	10.156
1	87052035	87052551	1:87052035..87052551	40786	51486_1	0.123	12.768	-0.103	12.768
1	87203788	87204492	1:87203788..87204492	HS2ST1	267436_1	0.037	10.05	-0.62	10.05
1	87203788	87204492	1:87203788..87204492	HS2ST1	278236_1	0.116	7.641	-0.03	7.641
1	87203788	87204492	1:87203788..87204492	HS2ST1	1950979_1	-0.205	8.267	-0.064	8.267
1	87519052	87519706	1:87519052..87519706	LMO4	50031_1	-0.355	10.101	-0.988	10.101
1	87531227	87535384	1:87531227..87535384		1642183_1	0.042	7.599	0.143	7.599
1	88900009	88900505	1:88900009..88900505	PKN2	2185657_1	0.595	10.907	0.189	10.907
1	89045942	89046554	1:89045942..89046554	GTF2B	207578_1	0.629	10.17	-0.244	10.17
1	89133924	89134704	1:89133924..89134704	KAT3	272970_1	-0.299	12.13	0.017	12.13
1	89133924	89134704	1:89133924..89134704	KAT3	795392_1	0.115	9.107	-0.344	9.107
1	89133924	89134704	1:89133924..89134704	KAT3	232856_1	0.001	7.433	-0.034	7.433
1	89230025	89242912	1:89230025..89242912	GBP1	841008_1	0.1	7.364	0.061	7.364
1	89285330	89303820	1:89285330..89303820	GBP2	298899_1	0.551	8.851	0.112	8.851
1	89359476	89376583	1:89359476..89376583	GBP4	1990634_1	0.359	11.602	0.222	11.602
1	89359476	89376583	1:89359476..89376583	GBP4	22443_1	-0.25	9.23	-0.173	9.23
1	89438283	89447458	1:89438283..89447458	GBP5	2452232_1	-0.055	7.361	-0.03	7.361
1	89744677	89745306	1:89744677..89745306	TA-LRRP	2239626_1	0.088	7.619	0.084	7.619
1	89810727	89892733	1:89810727..89892733	FAD158	786612_1	0.285	8.55	-0.066	8.55
1	89810727	89892733	1:89810727..89892733	FAD158	754176_1	-0.107	9.365	-0.657	9.365
1	90000313	90000749	1:90000313..90000749	LRRC5	505067_1	0.457	8.257	0.14	8.257
1	90172700	90205806	1:90172700..90205806	ZNF326	344544_1	-0.705	9.258	-0.253	9.258
1	90172700	90205806	1:90172700..90205806	ZNF326	1636853_1	0.106	7.713	-0.003	7.713
1	90172700	90205806	1:90172700..90205806	ZNF326	1069794_1	-0.065	7.395	0.055	7.395
1	91092875	91199692	1:91092875..91199692	ZNF644	134300_1	0.579	10.443	-0.328	10.443
1	91191890	91192699	1:91191890..91192699		1522159_1	0.182	8.745	-0.251	8.745
1	91438342	91530215	1:91438342..91530215	FLJ36760	797009_1	-0.064	7.54	-0.183	7.54
1	91693770	91694332	1:91693770..91694332	CDC7	287749_1	-0.239	10.141	-0.453	10.141
1	92344625	92362303	1:92344625..92362303	KIAA1107	28414_1	0.511	8.208	0.173	8.208
1	92366828	92368291	1:92366828..92368291		32331_1	-0.094	11.506	-0.313	11.506
1	92426861	92429660	1:92426861..92429660	GLMN	796702_1	0.207	9.936	-0.654	9.936
1	92492870	92493403	1:92492870..92493403	FLJ13150	321972_1	-0.563	9.282	-0.625	9.282
1	92492870	92493403	1:92492870..92493403	FLJ13150	138843_1	0.053	7.966	0.059	7.966
1	92850763	92851104	1:92850763..92851104	EVI5	137529_1	0.034	7.586	0.145	7.586
1	93108292	93111676	1:93108292..93111676	RPL5	897596_2	-0.128	12.276	0.192	12.276
1	93108292	93111676	1:93108292..93111676	RPL5	897596_1	-0.034	11.477	0.253	11.477
1	93256863	93315144	1:93256863..93315144	M96	703465_1	-0.333	10.31	-0.777	10.31
1	93256863	93315144	1:93256863..93315144	M96	197838_1	-0.123	13.296	-0.535	13.296
1	93523498	93540170	1:93523498..93540170	DR1	296695_1	-0.904	9.766	-1.184	9.766
1	93541511	93542148	1:93541511..93542148		265442_1	-0.223	9.559	-0.241	9.559
1	93719777	93720244	1:93719777..93720244	FNBP1L	22086_1	2.211	10.5	1.142	10.5
1	93792939	93793675	1:93792939..93793675	BCAR3	146699_1	0.614	11.315	0.409	11.315
1	93792939	93793675	1:93792939..93793675	BCAR3	2181058_1	0.44	10.795	0.223	10.795
1	94053242	94057495	1:94053242..94057495	ERBP	969914_1	-0.126	7.858	-0.093	7.858
1	94053242	94057495	1:94053242..94057495	ERBP	3542384_1	-0.211	9.777	-0.618	9.777
1	94066028	94066738	1:94066028..94066738	GCLM	135931_1	0.238	10.674	-0.407	10.674
1	94170413	94298709	1:94170413..94298709	ABCA4	380737_1	0.134	8.913	0.296	8.913
1	94659099	94696243	1:94659099..94696243	ABCD3	143221_1	1.776	11.481	0.492	11.481
1	94706893	94719336	1:94706893..94719336	F3	136590_1	-0.034	7.913	-0.025	7.913
1	94832088	94832517	1:94832088..94832517		757751_1	0.475	9.139	0.282	9.139
1	95045456	95046252	1:95045456..95046252	MGC45474	2277646_1	0.507	11.7	0.459	11.7
1	95095079	95095557	1:95095079..95095557	CNN3	250888_1	0.192	13.548	-1.929	13.548
1	95302937	95303578	1:95302937..95303578	FLJ31842	176269_1	0.459	8.841	0.302	8.841
1	95488504	95495840	1:95488504..95495840		1641909_1	-0.187	9.082	0.601	9.082
1	96950091	96950537	1:96950091..96950537	PTBP2	1675531_1	-0.347	11.507	-0.632	11.507
1	97441747	97442328	1:97441747..97442328	DPYD	770957_1	-0.495	8.079	-0.507	8.079
1	99851787	99852186	1:99851787..99852186	PALMD	197777_1	1.559	8.221	0.14	8.221
1	99851787	99852186	1:99851787..99852186	PALMD	128994_1	0.063	7.373	0.073	7.373
1	100028065	100101597	1:100028065..100101597	AGL	784756_1	1.141	10.959	0.169	10.959
1	100114355	100115375	1:100114355..100115375		212357_1	0.045	8.051	0.051	8.051
1	100147582	100201604	1:100147582..100201604		131492_1	1.093	9.131	0.477	9.131
1	100249621	100250171	1:100249621..100250171	HIAT1	1626442_1	-0.104	8.59	-0.507	8.59
1	100249621	100250171	1:100249621..100250171	HIAT1	241762_1	0.104	7.73	-0.089	7.73
1	100249621	100250171	1:100249621..100250171	HIAT1	25364_1	0.895	10.293	0.072	10.293
1	100369764	100370554	1:100369764..100370554		128933_1	-0.027	8.458	-0.231	8.458
1	100458497	100459032	1:100458497..100459032	RTCD1	280502_1	1.298	12.073	-0.319	12.073
1	100522053	100522819	1:100522053..100522819	CDC14A	293403_1	0.071	7.464	0.085	7.464
1	100715713	100719592	1:100715713..100719592	GPR88	281757_1	-0.358	8.147	0.041	8.147
1	100897317	100916622	1:100897317..100916622	VCAM1	44477_1	-1.494	8.452	-1.057	8.452
1	101049967	101073575	1:101049967..101073575	EXTL2	364399_1	0.698	10.023	0.256	10.023
1	101143387	101173837	1:101143387..101173837	SLC30A7	143640_1	0.003	9.242	-0.132	9.242
1	101143387	101173837	1:101143387..101173837	SLC30A7	1620748_1	0.122	9.739	-0.197	9.739
1	101143387	101173837	1:101143387..101173837	SLC30A7	140495_1	0.018	7.904	-0.058	7.904
1	101143387	101173837	1:101143387..101173837	SLC30A7	148903_1	0.206	8.291	0.021	8.291
1	101258203	101259012	1:101258203..101259012		243972_1	-0.011	7.448	-0.101	7.448
1	101414595	101419092	1:101414595..101419092	EDG1	307325_1	-0.619	9.135	-0.249	9.135
1	101419635	101420209	1:101419635..101420209		307323_1	-0.061	7.636	-0.118	7.636
1	103185487	103185815	1:103185487..103185815	COL11A1	1682477_1	0.043	8.31	0.137	8.31
1	103185487	103185815	1:103185487..103185815	COL11A1	260324_1	-0.126	7.785	-0.087	7.785
1	103780423	103809878	1:103780423..103809878	RNP	112780_1	-0.231	11.855	-0.458	11.855
1	103830745	103831406	1:103830745..103831406	AMY2B	1845330_1	0.272	7.647	0.057	7.647
1	103830745	103831406	1:103830745..103831406	AMY2B	788552_1	0.992	8.423	-0.043	8.423
1	107311379	107313956	1:107311379..107313956	HRMT1L6	52639_1	0.776	10.903	0.061	10.903
1	107825828	108219580	1:107825828..108219580	VAV3	203949_1	2.92	10.321	1.742	10.321
1	107825828	108219580	1:107825828..108219580	VAV3	2268602_1	0.469	10.937	0.29	10.937
1	108439307	108439913	1:108439307..108439913	SLC25A24	1560389_1	0.073	7.731	0.02	7.731
1	108439307	108439913	1:108439307..108439913	SLC25A24	147373_1	0.999	10.552	0.523	10.552
1	108490933	108501335	1:108490933..108501335	DKFZp434D177-like	1755227_1	0.476	7.879	0.035	7.879
1	108785855	108786291	1:108785855..108786291	LOC284611	44075_1	0.022	7.526	0.039	7.526
1	108785855	108786291	1:108785855..108786291	LOC284611	40226_1	0.088	10.89	-0.637	10.89
1	108902965	108916190	1:108902965..108916190	FLJ30525	2143712_1	0.604	12.076	0.601	12.076
1	108947004	108956560	1:108947004..108956560	FLJ10330	295140_1	-0.301	10.422	-0.685	10.422
1	108947004	108956560	1:108947004..108956560	FLJ10330	259280_1	0.064	10.386	-0.163	10.386
1	109035748	109036206	1:109035748..109036206	STXBP3	42858_1	0.22	11.199	-0.816	11.199
1	109091861	109092149	1:109091861..109092149	MGC26989	1858985_1	-0.176	9.771	-0.496	9.771
1	109224877	109296777	1:109224877..109296777	WDR47	48014_1	0.649	8.945	-0.08	8.945
1	109317487	109318520	1:109317487..109318520		701412_1	0.605	9.826	0.055	9.826
1	109345415	109351594	1:109345415..109351594	AD-020	208790_1	0.129	7.754	0.083	7.754
1	109385134	109385727	1:109385134..109385727	KIAA1324	2346678_1	3.102	11.571	3.195	11.571
1	109385134	109385727	1:109385134..109385727	KIAA1324	28203_1	-0.055	7.451	0.017	7.451
1	109385134	109385727	1:109385134..109385727	KIAA1324	729959_1	1.011	9.72	1.137	9.72
1	109469923	109472153	1:109469923..109472153	SARS	753742_1	1.096	10.794	0.37	10.794
1	109504682	109530414	1:109504682..109530414	CELSR2	42919_1	-0.068	7.849	0.005	7.849
1	109534230	109537083	1:109534230..109537083	DDA3	281898_1	-0.421	9.137	-0.205	9.137
1	109613061	109613287	1:109613061..109613287	SORT1	4123836_1	-0.544	7.94	-0.469	7.94
1	109735132	109736797	1:109735132..109736797	MG29	1706795_1	0.076	8.416	0.074	8.416
1	109740209	109747391	1:109740209..109747391	ATXN7L2	308847_1	0.038	8.439	-0.245	8.439
1	109752942	109755105	1:109752942..109755105	CYB561D1	303145_1	-0.123	10.388	-0.592	10.388
1	109758842	109763410	1:109758842..109763410	AMIGO	129789_1	-0.167	8.803	-0.18	8.803
1	109803342	109849017	1:109803342..109849017	GNAI3	277553_1	0.667	12.553	0.24	12.553
1	109875242	109886798	1:109875242..109886798	AMPD2	811013_1	0.152	8.112	0.124	8.112
1	109910744	109916364	1:109910744..109916364	GSTM4	840990_1	0.822	9.281	0.56	9.281
1	109922765	109924244	1:109922765..109924244	GSTM2	504682_1	0.301	9.749	0.415	9.749
1	109966919	109972925	1:109966919..109972925	GSTM5	277507_1	0.046	7.505	0.044	7.505
1	109966919	109972925	1:109966919..109972925	GSTM5	377731_1	0.179	7.346	-0.03	7.346
1	109988674	109995082	1:109988674..109995082	GSTM3	137940_2	2.888	10.91	1.129	10.91
1	109988674	109995082	1:109988674..109995082	GSTM3	137940_3	2.888	11.08	1.113	11.08
1	109988674	109995082	1:109988674..109995082	GSTM3	137940_4	2.879	10.887	1.055	10.887
1	109988674	109995082	1:109988674..109995082	GSTM3	137940_1	3.326	11.691	1.251	11.691
1	110015100	110015503	1:110015100..110015503	EPS8L3	1408963_1	-0.023	8.004	0.036	8.004
1	110165498	110184403	1:110165498..110184403	CSF1	124554_1	0.032	8.015	0.083	8.015
1	110165498	110184403	1:110165498..110184403	CSF1	1856658_1	0.036	7.793	-0.081	7.793
1	110244349	110244997	1:110244349..110244997	AHCYL1	268484_1	1.174	12.427	0.505	12.427
1	110453158	110456863	1:110453158..110456863	SLC6A17	41254_1	-0.029	7.714	-0.14	7.714
1	110617546	110645678	1:110617546..110645678	SLC16A4	190080_1	-0.521	9.089	-0.402	9.089
1	110617546	110645678	1:110617546..110645678	SLC16A4	141562_1	-0.107	13.727	-0.157	13.727
1	110660297	110660855	1:110660297..110660855	HBXIP	121591_1	0.209	12.481	0.029	12.481
1	110735363	110743447	1:110735363..110743447		754416_1	0.069	7.449	0.019	7.449
1	111125880	111154592	1:111125880..111154592	CD53	201570_1	-2.425	8.915	-2.172	8.915
1	111125880	111154592	1:111125880..111154592	CD53	122020_1	0.009	7.414	0.005	7.414
1	111201853	111218608	1:111201853..111218608	RIF1	1737970_1	0.229	8.269	0.067	8.269
1	111201853	111218608	1:111201853..111218608	RIF1	137655_1	0.021	9.93	-0.204	9.93
1	111432877	111439764	1:111432877..111439764	CEPT1	305274_1	2.791	10.556	1.635	10.556
1	111455434	111482377	1:111455434..111482377	CHI3L2	854338_1	-0.242	8.58	-0.099	8.58
1	111668989	111682441	1:111668989..111682441	OVGP1	1987762_1	0.451	11.324	0.246	11.324
1	111693306	111695742	1:111693306..111695742	MEP50	46628_1	-0.346	9.449	-0.416	9.449
1	111705838	111706413	1:111705838..111706413	ATP5F1	34310_1	0.411	13.911	0.392	13.911
1	111756109	111756526	1:111756109..111756526	ADORA3	137746_1	0.075	7.486	0.1	7.486
1	111900309	111901046	1:111900309..111901046	RAP1A	252436_1	0.899	8.791	0.428	8.791
1	111900309	111901046	1:111900309..111901046	RAP1A	25134_1	2.011	11.73	0.34	11.73
1	111977467	111980102	1:111977467..111980102	LOC55924	154379_1	-0.669	8.204	0.363	8.204
1	112002747	112003548	1:112002747..112003548	DDX20	795760_1	0.531	10.848	0.046	10.848
1	112685843	112686613	1:112685843..112686613	DKFZp547A023	1500271_1	0.096	8.251	0.009	8.251
1	112685843	112686613	1:112685843..112686613	DKFZp547A023	268825_1	0.333	10.315	0.232	10.315
1	112721204	112775947	1:112721204..112775947	WNT2B	788183_1	-0.026	9.212	0.369	9.212
1	112785493	112786043	1:112785493..112786043	ST7L	268286_1	0.132	10.059	-0.351	10.059
1	112785493	112786043	1:112785493..112786043	ST7L	129070_1	0.39	8.279	0.09	8.279
1	112785493	112786043	1:112785493..112786043	ST7L	754460_1	-0.015	7.969	0.013	7.969
1	112924944	112926277	1:112924944..112926277	CAPZA1	309734_1	-0.008	13.23	0.151	13.23
1	112956169	112957041	1:112956169..112957041	RHOC	2966676_1	0.237	7.95	0.405	7.95
1	112964661	112969955	1:112964661..112969955	PPP2CZ	1987243_1	0.328	11.084	0.268	11.084
1	113166894	113210847	1:113166894..113210847	SLC16A1	135007_1	-2.249	11.377	-1.731	11.377
1	113262917	113301709	1:113262917..113301709		752647_1	-0.134	7.777	-0.203	7.777
1	113327872	113379384	1:113327872..113379384	LRIG2	1570402_1	0.071	7.584	0.05	7.584
1	113451545	113460917	1:113451545..113460917		744897_1	-0.64	9.668	0.341	9.668
1	113797811	113798546	1:113797811..113798546	MAGI-3	1048685_1	0.337	7.567	0.085	7.567
1	114049049	114050307	1:114049049..114050307	RSBN1	137620_1	-0.175	8.691	0.056	8.691
1	114203851	114204556	1:114203851..114204556	HIPK1	220054_1	0.208	10.942	-0.156	10.942
1	114234154	114236918	1:114234154..114236918	OLFML3	259578_1	-1.073	8.064	-0.586	8.064
1	114399849	114400605	1:114399849..114400605	SYT6	43745_1	1.195	8.374	-0.087	8.374
1	114647450	114649654	1:114647450..114649654	TRIM33	143074_1	-0.233	10.533	-0.805	10.533
1	114647450	114649654	1:114647450..114649654	TRIM33	278496_1	-0.16	9.206	-0.209	9.206
1	114647450	114649654	1:114647450..114649654	TRIM33	757286_1	-0.672	8.114	-0.532	8.114
1	114822219	114836283	1:114822219..114836283	BCAS2	305306_1	0.041	12.378	-0.984	12.378
1	114837510	114924774	1:114837510..114924774	FLJ37099	1839806_1	-0.206	7.842	-0.151	7.842
1	114837510	114924774	1:114837510..114924774	FLJ37099	1560689_1	-0.087	7.688	0.072	7.688
1	114927763	114950281	1:114927763..114950281	AMPD1	562813_1	0.393	9.79	0.329	9.79
1	114971579	115012627	1:114971579..115012627	UNR	201356_1	0.073	13.496	-0.444	13.496
1	114982415	114983182	1:114982415..114983182	NRAS	3826638_1	-1.103	11.699	-0.628	11.699
1	115025710	115035348	1:115025710..115035348	FLJ21168	142219_1	-0.211	9.272	-0.242	9.272
1	115109496	115250033	1:115109496..115250033	SYCP1	1031799_1	0.029	8.158	-0.116	8.158
1	115109496	115250033	1:115109496..115250033	SYCP1	1408549_1	0.087	7.637	0.015	7.637
1	115339959	115340593	1:115339959..115340593	TSPAN2	785648_1	-0.099	7.791	-0.04	7.791
1	115925620	115926031	1:115925620..115926031	VANGL1	2456997_1	-0.289	9.564	-0.422	9.564
1	115925620	115926031	1:115925620..115926031	VANGL1	274928_1	0.522	9.252	1.257	9.252
1	115925620	115926031	1:115925620..115926031	VANGL1	158442_1	-0.197	8.295	0.108	8.295
1	115951729	115952452	1:115951729..115952452		342741_1	0.664	8.767	0.701	8.767
1	115954669	116023444	1:115954669..116023444	CASQ2	377166_1	0.067	7.781	0.135	7.781
1	116268475	116272368	1:116268475..116272368	SLC22A15	53061_1	-0.215	8.217	0.336	8.217
1	116627923	116659438	1:116627923..116659438	ATP1A1	298135_1	0.192	11.934	-0.036	11.934
1	116627923	116659438	1:116627923..116659438	ATP1A1	1639716_1	0.073	7.426	-0.001	7.426
1	116791689	116792320	1:116791689..116792320	CD58	211319_1	0.021	9.563	-0.133	9.563
1	117019538	117022255	1:117019538..117022255	CD2	1709513_1	-0.107	7.494	-0.117	7.494
1	117164730	117245014	1:117164730..117245014	PTGFRN	28314_1	-1.408	9.1	0.505	9.1
1	117359973	117362115	1:117359973..117362115		163100_1	-0.556	8.209	-0.32	8.209
1	117396228	117396766	1:117396228..117396766		122121_1	0.557	10.247	1.528	10.247
1	117619562	117620137	1:117619562..117620137		1604751_1	0.011	7.747	-0.024	7.747
1	117662560	117662980	1:117662560..117662980	MAN1A2	786109_1	-0.358	10.115	0.437	10.115
1	117662560	117662980	1:117662560..117662980	MAN1A2	812266_1	-0.037	7.789	0.303	7.789
1	117860645	117883028	1:117860645..117883028	FAM46C	726756_1	0.003	8.31	-0.176	8.31
1	118178799	118179257	1:118178799..118179257	GDAP2	297948_1	0.341	9.497	-0.23	9.497
1	119640354	119640666	1:119640354..119640666	HAO2	1866597_1	-0.133	7.657	-0.06	7.657
1	119663839	119664666	1:119663839..119664666		112145_1	0.051	7.652	0.072	7.652
1	119761901	119769719	1:119761901..119769719	HSD3B1	490511_1	-0.051	7.508	0.017	7.508
1	119814268	119826776	1:119814268..119826776	LOC128102	2145269_1	0.071	7.684	0.059	7.684
1	119859981	119863613	1:119859981..119863613		1604367_1	-0.064	9.094	-0.371	9.094
1	119874079	119876163	1:119874079..119876163	MGC45731	796397_1	-0.741	8.59	-0.671	8.59
1	119995498	119995930	1:119995498..119995930	PHGDH	45942_1	-3.27	9.612	-0.647	9.612
1	120003043	120023550	1:120003043..120023550	HMGCS2	108692_1	-0.144	7.795	0.242	7.795
1	120003043	120023550	1:120003043..120023550	HMGCS2	1640217_1	0.031	7.381	0.016	7.381
1	120148197	120151160	1:120148197..120151160	ADAM30	1840399_1	0.008	7.694	-0.066	7.694
1	120545653	120550003	1:120545653..120550003		281777_1	0.128	8.137	0.248	8.137
1	120872205	120872524	1:120872205..120872524		1854133_1	-0.359	7.688	-0.088	7.688
1	142321243	142323852	1:142321243..142323852	PDE4DIP	49385_1	0.066	11.985	-0.371	11.985
1	142321243	142323852	1:142321243..142323852	PDE4DIP	230341_1	-0.288	8.942	-0.396	8.942
1	142321243	142323852	1:142321243..142323852	PDE4DIP	283013_1	-0.138	7.671	-0.059	7.671
1	142713640	142774953	1:142713640..142774953	NOTCH2NL	344287_1	0.333	12.38	0.427	12.38
1	142713640	142774953	1:142713640..142774953	NOTCH2NL	2257185_1	0.359	11.006	0.231	11.006
1	142713640	142774953	1:142713640..142774953	NOTCH2NL	1565428_1	-0.012	7.35	-0.011	7.35
1	142776712	142777051	1:142776712..142777051	NOTCH2	23249_1	-0.413	10.08	0.596	10.08
1	142902321	142906589	1:142902321..142906589	HFE2	205762_1	-0.365	12.142	-0.551	12.142
1	143007241	143012704	1:143007241..143012704	PEX11B	30793_1	0.298	9.976	0.919	9.976
1	143146747	143147295	1:143146747..143147295	ZNF364	344220_1	0.237	9.243	0.153	9.243
1	143146747	143147295	1:143146747..143147295	ZNF364	271672_1	-0.043	9.896	0.731	9.896
1	143851500	143868945	1:143851500..143868945	PRKAB2	300137_1	-0.059	7.712	-0.17	7.712
1	143851500	143868945	1:143851500..143868945	PRKAB2	742604_1	-0.153	10.595	-0.245	10.595
1	143891855	143892619	1:143891855..143892619	FMO5	197525_1	-0.827	8.125	-0.502	8.125
1	143977587	143978288	1:143977587..143978288	CHD1L	321849_1	-0.059	7.747	-0.099	7.747
1	143977587	143978288	1:143977587..143978288	CHD1L	145151_1	-2.086	10.816	-0.238	10.816
1	143977587	143978288	1:143977587..143978288	CHD1L	110791_1	0.158	7.984	0.035	7.984
1	144237997	144322828	1:144237997..144322828	BCL9	1456701_1	0.629	12.34	1.109	12.34
1	144453708	144470258	1:144453708..144470258	GJA5	257661_1	0.036	7.774	0.12	7.774
1	144690909	144709147	1:144690909..144709147	PDZK1	204565_1	0.051	10.22	-0.374	10.22
1	144690909	144709147	1:144690909..144709147	PDZK1	1736455_1	0.036	7.533	0.075	7.533
1	144699099	144699626	1:144699099..144699626	PDZK1	248651_1	1.76	10.273	0.248	10.273
1	144833112	144833479	1:144833112..144833479		175780_1	0.165	10.601	-0.5	10.601
1	144950037	144966401	1:144950037..144966401	FLJ39739	109123_1	-0.995	7.829	-0.688	7.829
1	145377858	145378562	1:145377858..145378562		53331_1	-0.169	7.883	-0.036	7.883
1	145682668	145683402	1:145682668..145683402		149753_1	-0.252	8.868	0.045	8.868
1	146065336	146069242	1:146065336..146069242		153838_1	-0.22	8.78	-0.236	8.78
1	146504504	146514224	1:146504504..146514224		1753065_1	0.014	7.785	-0.033	7.785
1	146567360	146577147	1:146567360..146577147	FCGR1A	2443616_1	0.571	12.167	0.651	12.167
1	146612522	146615356	1:146612522..146615356	HIST2H4	320706_1	-0.135	11.089	-0.594	11.089
1	146626599	146627380	1:146626599..146627380	HIST2H2AA	488964_1	0.19	10.253	0.417	10.253
1	146669081	146671287	1:146669081..146671287	HIST2H2BE	201123_1	-0.412	10.87	-0.309	10.87
1	146688366	146689066	1:146688366..146689066	SV2A	113295_1	-0.49	8.077	-0.232	8.077
1	146712154	146713594	1:146712154..146713594	SF3B4	38675_1	0.127	8.606	0.632	8.606
1	146713616	146721800	1:146713616..146721800	CRA	345858_1	0.332	9.005	0.312	9.005
1	146722777	146723226	1:146722777..146723226		172685_1	-0.038	8.956	-0.094	8.956
1	146787228	146787953	1:146787228..146787953	ZA20D1	127229_1	-0.348	13.554	-0.325	13.554
1	146871711	146872143	1:146871711..146872143	VPS45A	1390002_1	-0.084	9.838	-0.274	9.838
1	146944673	146949989	1:146944673..146949989	CKIP-1	301965_1	-0.521	8.742	-0.275	8.742
1	146944673	146949989	1:146944673..146949989	CKIP-1	727207_1	-0.026	7.543	-0.09	7.543
1	147003795	147021442	1:147003795..147021442	ANP32E	2288260_1	0.262	11.549	0.18	11.549
1	147050948	147067785	1:147050948..147067785	APH-1A	244346_1	-0.154	8.815	0.268	8.815
1	147054405	147055054	1:147054405..147055054	CA14	125823_1	-0.599	8.655	-0.352	8.655
1	147065575	147066400	1:147065575..147066400	FLJ23221	122169_1	0.169	9.081	0.149	9.081
1	147079338	147093883	1:147079338..147093883	MRPS21	771173_1	-0.829	10.266	-0.509	10.266
1	147293610	147299102	1:147293610..147299102	ECM1	301122_1	-0.054	7.434	-0.107	7.434
1	147346443	147348768	1:147346443..147348768	TSRC1	323831_1	-0.158	8.036	-0.118	8.036
1	147364467	147365135	1:147364467..147365135	MCL1	21555_1	-0.108	8.593	-0.046	8.593
1	147408826	147415171	1:147408826..147415171	ENSA	44831_1	-0.71	9.747	-0.314	9.747
1	147510347	147510845	1:147510347..147510845		725675_1	0.056	7.523	0.102	7.523
1	147516092	147551378	1:147516092..147551378	CTSS	130391_1	-0.265	11.495	-0.523	11.495
1	147582612	147583450	1:147582612..147583450	CTSK	4860926_1	0.048	7.678	-0.116	7.678
1	147582612	147583450	1:147582612..147583450	CTSK	123926_1	0.039	7.349	0.028	7.349
1	147595258	147662259	1:147595258..147662259	ARNT	448193_1	0.022	7.489	0.112	7.489
1	147595258	147662259	1:147595258..147662259	ARNT	66965_1	-0.205	8.791	0.534	8.791
1	147711952	147713522	1:147711952..147713522	SETDB1	25755_1	-0.004	7.751	-0.037	7.751
1	147750734	147760392	1:147750734..147760392	LASS2	305098_1	-0.225	12.638	-0.19	12.638
1	147767626	147781183	1:147767626..147781183	ANXA9	137481_1	-0.162	12.116	-0.596	12.116
1	147767626	147781183	1:147767626..147781183	ANXA9	124967_1	0.774	8.426	0.19	8.426
1	147794025	147821262	1:147794025..147821262	PRUNE	364324_1	-0.081	10.778	0.213	10.778
1	147844936	147854043	1:147844936..147854043	AF1Q	51270_1	0.327	10.433	-1.651	10.433
1	147844936	147854043	1:147844936..147854043	AF1Q	812105_1	0.295	9.759	-1.58	9.759
1	147856733	147857031	1:147856733..147857031	MGC29891	1643807_1	-0.046	7.682	-0.075	7.682
1	147917615	147918417	1:147917615..147918417	SEMA6C	327432_1	0.19	12.236	0.03	12.236
1	147942199	147945297	1:147942199..147945297	FLJ23467	123724_1	-0.105	8.426	-0.082	8.426
1	147962012	147975704	1:147962012..147975704	TCFL1	165908_1	0.055	9.241	1.032	9.241
1	148076612	148076820	1:148076612..148076820	UQCRFS1	782800_1	0.413	10.794	0.695	10.794
1	148094134	148094888	1:148094134..148094888	PIK4CB	769013_1	0.024	8.678	0.255	8.678
1	148149857	148158255	1:148149857..148158255	SELENBP1	80338_1	0.129	8.514	0.306	8.514
1	148149857	148158255	1:148149857..148158255	SELENBP1	3853674_1	-1.862	9.684	-1.584	9.684
1	148185135	148186392	1:148185135..148186392	PSMB4	295783_1	-0.034	13.08	1.682	13.08
1	148218359	148218918	1:148218359..148218918	POGZ	38926_1	-0.233	9.841	0.362	9.841
1	148296945	148324241	1:148296945..148324241	CGN	296444_1	0.946	8.744	0.391	8.744
1	148403981	148404560	1:148403981..148404560	SNX27	35178_1	0.132	9.447	0.434	9.447
1	148487953	148502363	1:148487953..148502363	TNRC4	39843_1	0.06	7.528	0.06	7.528
1	148545195	148549113	1:148545195..148549113	MRPL9	229377_1	-0.135	10.675	0.387	10.675
1	148559032	148576071	1:148559032..148576071	TDRKH	1667602_1	0.425	8.576	0.271	8.576
1	148585837	148590955	1:148585837..148590955	LRRN6D	204339_1	-0.087	7.759	-0.048	7.759
1	148631292	148639246	1:148631292..148639246	FLJ37964	156852_1	0.036	7.755	0.033	7.755
1	148631292	148639246	1:148631292..148639246	FLJ37964	1657039_1	-0.079	7.968	0.014	7.968
1	148672028	148672647	1:148672028..148672647	CTMP	727471_1	-0.765	9.133	-0.648	9.133
1	148780922	148781542	1:148780922..148781542		299172_1	-0.037	7.553	-0.02	7.553
1	148818081	148822519	1:148818081..148822519	S100A11	810612_1	0.085	7.93	0.469	7.93
1	148892646	148893063	1:148892646..148893063		668007_1	0.076	8.072	0.485	8.072
1	149099007	149151124	1:149099007..149151124	LOC339400	46285_1	-0.344	8.879	-0.432	8.879
1	149099007	149151124	1:149099007..149151124	LOC339400	179541_1	-0.035	7.831	-0.099	7.831
1	149471674	149472950	1:149471674..149472950	LCE2B	343888_1	-0.599	10.373	-0.521	10.373
1	149663883	149670585	1:149663883..149670585	MCSP	1031185_1	0.205	7.787	0.075	7.787
1	149694093	149694593	1:149694093..149694593	IVL	2449565_1	-0.065	7.637	-0.09	7.637
1	149770796	149771363	1:149770796..149771363	SPRR1A	2448791_1	-0.098	7.381	-0.084	7.381
1	149787297	149789216	1:149787297..149789216	SPRR3	1893121_1	-0.022	7.763	-0.037	7.763
1	149817871	149818449	1:149817871..149818449	SPRR1B	813614_1	0.025	7.912	0.116	7.912
1	149925666	149927042	1:149925666..149927042	SPRR2C	729942_1	-0.032	7.679	-0.162	7.679
1	150115668	150134118	1:150115668..150134118	PGLYRP4	346359_1	0.013	8.072	0.212	8.072
1	150143816	150146567	1:150143816..150146567	S100A9	1459376_1	-0.109	7.412	-0.088	7.412
1	150159258	150161198	1:150159258..150161198	S100A12	123640_1	-0.327	10.24	-0.455	10.24
1	150243294	150244580	1:150243294..150244580	S100A7	1088345_1	0.552	8.039	0.104	8.039
1	150320198	150320910	1:150320198..150320910	S100A6	1385646_1	-0.636	13.683	3.291	13.683
1	150346963	150349439	1:150346963..150349439	S100A2	810813_2	-0.067	8.184	0.146	8.184
1	150346963	150349439	1:150346963..150349439	S100A2	810813_1	0.001	7.422	0.02	7.422
1	150399917	150401864	1:150399917..150401864	S100A14	3640899_1	0.701	9.82	2.512	9.82
1	150414010	150417486	1:150414010..150417486	S100A1	179046_1	0.573	10.424	-0.123	10.424
1	150424895	150425580	1:150424895..150425580	DKFZP547E1010	41331_1	-0.386	9.936	0.47	9.936
1	150449597	150454063	1:150449597..150454063	ILF2	243000_1	-0.017	11.241	0.388	11.241
1	150476392	150476838	1:150476392..150476838	NPR1	898332_1	-0.136	7.584	-0.063	7.584
1	150560867	150565705	1:150560867..150565705	SLC27A3	325211_1	-0.133	9.366	0.773	9.366
1	150560867	150565705	1:150560867..150565705	SLC27A3	139804_1	0.091	8.444	0.032	8.444
1	150715049	150732245	1:150715049..150732245	KIAA0476	212303_1	0.1	10.646	0.266	10.646
1	150744658	150749024	1:150744658..150749024	SLC39A1	307956_1	-0.255	11.341	-0.741	11.341
1	150744658	150749024	1:150744658..150749024	SLC39A1	727981_1	-0.278	11.972	-0.511	11.972
1	150744658	150749024	1:150744658..150749024	SLC39A1	51310_1	-0.257	10.242	1.422	10.242
1	150767202	150771795	1:150767202..150771795	RAB13	267219_1	-0.252	11.336	1.265	11.336
1	150830429	150830838	1:150830429..150830838	NUP210L	1641284_1	-0.297	7.851	-0.349	7.851
1	150947362	150948900	1:150947362..150948900	TPM3	310548_1	0.034	11.764	1.286	11.764
1	150947362	150948900	1:150947362..150948900	TPM3	758008_1	0.04	7.637	0.063	7.637
1	151028037	151028285	1:151028037..151028285	UBAP2L	211786_1	-0.177	9.548	-0.129	9.548
1	151058197	151059493	1:151058197..151059493	HAX1	196489_1	0.16	10.713	1.281	10.713
1	151121590	151121990	1:151121590..151121990	ATP8B2	267055_1	-0.627	10.487	-0.848	10.487
1	151213728	151214176	1:151213728..151214176	IL6R	754500_1	-0.037	11.01	-0.161	11.01
1	151213728	151214176	1:151213728..151214176	IL6R	250649_1	0.445	8.94	-0.109	8.94
1	151339157	151340566	1:151339157..151340566	UBE2Q	740632_1	-0.218	11.067	0.726	11.067
1	151379853	151380333	1:151379853..151380333	ADAR	23114_1	-0.237	12.27	-0.553	12.27
1	151587096	151587613	1:151587096..151587613	KCNN3	824081_1	0.286	9.046	0.414	9.046
1	151710282	151722540	1:151710282..151722540	PMVK	46897_1	0.344	8.478	0.882	8.478
1	151729628	151741640	1:151729628..151741640	PBXIP1	173537_1	0.117	7.951	0.113	7.951
1	151832768	151836479	1:151832768..151836479		1565297_1	-0.009	7.917	0.594	7.917
1	151836834	151848307	1:151836834..151848307	ADAM15	149142_1	-0.273	8.484	0.516	8.484
1	151919729	151920406	1:151919729..151920406	EFNA1	774043_1	-0.524	9.618	0.755	9.618
1	151921445	151924400	1:151921445..151924400	LOC55974	739454_1	-0.095	14.045	-0.069	14.045
1	151925439	151925757	1:151925439..151925757	DPM3	109278_1	0.211	8.504	0.672	8.504
1	151954956	151958806	1:151954956..151958806	KRTCAP2	129371_1	-0.102	9.959	1.256	9.959
1	151971378	151975779	1:151971378..151975779	MUC1	840687_1	1.145	11.168	1.265	11.168
1	151978451	151990763	1:151978451..151990763	THBS3	341991_1	0.009	8.582	0.701	8.582
1	151978451	151990763	1:151978451..151990763	THBS3	1754502_1	0.011	7.474	-0.085	7.474
1	152029708	152038347	1:152029708..152038347	C1orf2	125314_1	0.187	10.346	1.425	10.346
1	152038842	152045268	1:152038842..152045268	SCAMP3	206313_1	1.323	9.478	0.541	9.478
1	152045743	152052227	1:152045743..152052227	CLK2	49237_1	-0.459	9.619	-0.076	9.619
1	152091777	152095843	1:152091777..152095843	FDPS	80410_1	0.02	7.283	0.037	7.283
1	152319902	152320151	1:152319902..152320151	ASH1L	229884_1	0.436	9.966	0.996	9.966
1	152319902	152320151	1:152319902..152320151	ASH1L	281103_1	-0.24	10.107	1.066	10.107
1	152319902	152320151	1:152319902..152320151	ASH1L	43961_1	-0.171	13.601	-0.392	13.601
1	152442443	152443213	1:152442443..152443213	YAP	32605_1	-0.113	9.666	0.82	9.666
1	152509420	152509664	1:152509420..152509664	DAP3	301016_1	-0.949	12.828	0.283	12.828
1	152533232	152533664	1:152533232..152533664	FLJ20203	123329_1	-0.212	9.723	-0.358	9.723
1	152652637	152654960	1:152652637..152654960	SYT11	780937_1	-0.098	7.938	-0.249	7.938
1	152652637	152654960	1:152652637..152654960	SYT11	49367_1	-0.562	7.745	-0.367	7.745
1	152695908	152717263	1:152695908..152717263	KIAA0907	729937_1	-0.384	11.555	-0.274	11.555
1	152729718	152730234	1:152729718..152730234	ARHGEF2	308969_1	-0.448	8.425	0.002	8.425
1	152774253	152784651	1:152774253..152784651		757912_1	0.038	7.872	0.043	7.872
1	152845187	152845491	1:152845187..152845491	RAB25	152416_1	-0.628	9.723	0.59	9.723
1	152855153	152855827	1:152855153..152855827	LOC92312	269968_1	1.169	9.381	1.02	9.381
1	152902604	152903065	1:152902604..152903065	LMNA	292688_1	0.11	9.292	0.989	9.292
1	152936460	152960608	1:152936460..152960608	SEMA4A	147841_1	0.195	11.749	-0.15	11.749
1	152981533	152982054	1:152981533..152982054	KIAA0446	121496_1	-0.155	7.979	-0.158	7.979
1	153025067	153026181	1:153025067..153026181	BGLAP	123196_2	-0.496	10	-0.853	10
1	153025067	153026181	1:153025067..153026181	BGLAP	1893775_1	0.311	9.598	0.462	9.598
1	153025067	153026181	1:153025067..153026181	BGLAP	123196_1	-0.383	9.855	-0.691	9.855
1	153026279	153030916	1:153026279..153030916	PAQR6	50487_1	0.424	8.895	-0.016	8.895
1	153152103	153168078	1:153152103..153168078	RHBG	193916_1	-0.055	7.957	0.017	7.957
1	153187121	153191895	1:153187121..153191895	CROC4	757968_1	-0.329	7.691	-0.235	7.691
1	153187121	153191895	1:153187121..153191895	CROC4	43771_1	1.675	9.648	0.049	9.648
1	153218372	153218862	1:153218372..153218862		37234_1	0.036	8.101	-0.073	8.101
1	153274897	153275545	1:153274897..153275545	MEF2D	32353_1	0.445	9.095	0.747	9.095
1	153426414	153428653	1:153426414..153428653	BCAN	32687_1	-0.047	7.517	-0.078	7.517
1	153451627	153460262	1:153451627..153460262	NES	155100_1	-0.235	8.472	-0.568	8.472
1	153451627	153460262	1:153451627..153460262	NES	266135_1	-0.081	9.828	-0.332	9.828
1	153487286	153487616	1:153487286..153487616	CRABP2	2988143_1	0.953	7.881	0.019	7.881
1	153511350	153519814	1:153511350..153519814	CGI-41	108318_2	-0.058	10.448	-0.077	10.448
1	153511350	153519814	1:153511350..153519814	CGI-41	108318_3	-0.092	10.09	-0.209	10.09
1	153511350	153519814	1:153511350..153519814	CGI-41	108318_4	-0.171	10.507	-0.111	10.507
1	153511350	153519814	1:153511350..153519814	CGI-41	108318_1	-0.274	11.162	-0.05	11.162
1	153524973	153525822	1:153524973..153525822	HDGF	195443_1	0.116	11.892	0.825	11.892
1	153580140	153583678	1:153580140..153583678	PRCC	877644_1	1.041	10.784	-0.014	10.784
1	153589107	153599675	1:153589107..153599675	SH2D2A	2155560_1	0.391	10.733	0.321	10.733
1	153643679	153664715	1:153643679..153664715	NTRK1	6189591_1	-0.343	9.214	-0.568	9.214
1	153689181	153699291	1:153689181..153699291	FLJ00193	757323_1	-0.307	7.851	-0.295	7.851
1	153717796	153719872	1:153717796..153719872	ARHGEF11	244801_1	0.257	9.432	0.321	9.432
1	153874908	153882673	1:153874908..153882673	FLJ16478	231969_1	-0.002	7.38	-0.02	7.38
1	154356937	154380943	1:154356937..154380943	IRTA1	1504481_1	0.042	7.359	-0.032	7.359
1	154481926	154482366	1:154481926..154482366	FCRH3	1582819_1	-0.022	7.545	-0.006	7.545
1	154481926	154482366	1:154481926..154482366	FCRH3	1643753_1	0.03	7.669	0.005	7.669
1	154532727	154533290	1:154532727..154533290	SPAP1	1468910_1	0.003	7.522	0.043	7.522
1	154588034	154588476	1:154588034..154588476	FCRH1	128334_1	-0.134	9.585	-0.146	9.585
1	154613776	154624624	1:154613776..154624624	CD5L	126392_1	0.044	8.225	-0.03	8.225
1	154914906	154923502	1:154914906..154923502		342360_1	0.053	7.455	-0.045	7.455
1	154962809	154967759	1:154962809..154967759	CD1D	789242_1	-1.273	11.179	-0.684	11.179
1	154968746	154969290	1:154968746..154969290		31904_1	2.937	11.661	1.752	11.661
1	155072876	155076480	1:155072876..155076480	CD1C	428103_1	-0.52	7.622	-0.348	7.622
1	155108565	155109137	1:155108565..155109137	LOC90639	244997_1	0.119	8.364	0.103	8.364
1	155110851	155114331	1:155110851..155114331	CD1B	1950782_1	-0.466	8.455	-0.387	8.455
1	155136851	155139759	1:155136851..155139759	CD1E	308861_1	-1.514	8.284	-1.428	8.284
1	155255188	155263748	1:155255188..155263748	OR10K1	1743991_1	0.073	7.756	-0.018	7.756
1	155404894	155405576	1:155404894..155405576	SPTA1	112016_1	-0.033	7.915	0.098	7.915
1	155614229	155632367	1:155614229..155632367	MNDA	145130_1	-0.268	7.82	-0.241	7.82
1	155827372	155828086	1:155827372..155828086	IFI16	502237_1	-3.62	9.171	-3.512	9.171
1	155827372	155828086	1:155827372..155828086	IFI16	824602_2	-0.88	10.115	-1.265	10.115
1	155827372	155828086	1:155827372..155828086	IFI16	824602_1	-2.466	8.549	-2.573	8.549
1	155954488	155986005	1:155954488..155986005	IGSF4B	45607_1	-0.058	7.671	-0.071	7.671
1	155977187	155977760	1:155977187..155977760	FY	22411_1	0.025	7.262	-0.015	7.262
1	156085200	156087475	1:156085200..156087475	FCER1A	2314294_1	-0.08	7.335	-0.004	7.335
1	156370687	156371716	1:156370687..156371716	APCS	201650_1	-0.067	7.638	-0.01	7.638
1	156495521	156497437	1:156495521..156497437	CRP	121659_1	-0.018	7.291	0.051	7.291
1	156609673	156620355	1:156609673..156620355	SLAMF8	288807_1	-0.236	8.012	-0.124	8.012
1	156655226	156682988	1:156655226..156682988	NESG1	1839066_1	0.303	7.726	0.479	7.726
1	156700974	156703389	1:156700974..156703389	TAGLN2	33386_1	-0.796	9.627	1.383	9.627
1	156722916	156723361	1:156722916..156723361	IGSF9	756471_1	0.613	8.024	0.439	8.024
1	156766087	156766837	1:156766087..156766837		357402_1	-0.241	7.685	-0.156	7.685
1	156766087	156766837	1:156766087..156766837		595090_1	-0.173	7.338	-0.096	7.338
1	156812640	156814854	1:156812640..156814854	PIGM	327337_1	-0.029	9.022	0.102	9.022
1	156823341	156825158	1:156823341..156825158	KCNJ10	1703854_1	-0.091	7.898	-0.132	7.898
1	156823341	156825158	1:156823341..156825158	KCNJ10	730016_1	1.012	12.482	0.208	12.482
1	156864432	156872285	1:156864432..156872285	KCNJ9	184362_1	-0.113	8.683	0.39	8.683
1	156898620	156926526	1:156898620..156926526	ATP1A2	156437_1	-0.049	7.583	0.033	7.583
1	156997478	156998233	1:156997478..156998233	PEA15	45858_1	0.2	10.638	1.082	10.638
1	157035357	157036479	1:157035357..157036479	WDR42A	1841272_1	-0.061	7.62	0.028	7.62
1	157035357	157036479	1:157035357..157036479	WDR42A	40181_1	0.053	8.047	0.129	8.047
1	157072137	157072759	1:157072137..157072759	COPA	51641_1	-0.363	12.285	-0.21	12.285
1	157072137	157072759	1:157072137..157072759	COPA	282505_1	0.068	10.41	-0.028	10.41
1	157141202	157141815	1:157141202..157141815	NCSTN	45274_1	0.057	8.034	0.104	8.034
1	157149929	157155239	1:157149929..157155239	NHLH1	1570686_1	0.084	8.103	0.197	8.103
1	157323960	157324498	1:157323960..157324498		1573913_1	-0.26	8.023	-0.04	8.023
1	157327109	157327982	1:157327109..157327982		138815_1	-0.378	12.344	-0.96	12.344
1	157328853	157362336	1:157328853..157362336	CD84	202059_1	-0.275	11.782	-0.406	11.782
1	157393906	157394261	1:157393906..157394261	SLAMF1	814251_2	0.07	7.48	0.039	7.48
1	157393906	157394261	1:157393906..157394261	SLAMF1	814251_3	0.292	9.157	0.253	9.157
1	157393906	157394261	1:157393906..157394261	SLAMF1	814251_4	0.818	12.012	1.45	12.012
1	157393906	157394261	1:157393906..157394261	SLAMF1	814251_1	0.021	7.384	0.036	7.384
1	157463579	157463984	1:157463579..157463984	CD48	121687_1	0.181	8.643	0.284	8.643
1	157594974	157598202	1:157594974..157598202	LY9	1673872_1	-0.377	8.239	-0.036	8.239
1	157779056	157781600	1:157779056..157781600	F11R	1187871_1	0.276	8.29	0.133	8.29
1	157779056	157781600	1:157779056..157781600	F11R	115348_1	-0.297	11.988	-0.495	11.988
1	157881256	157883209	1:157881256..157883209	KARCA1	795597_1	1.172	8.501	1.297	8.501
1	157900095	157900604	1:157900095..157900604	PFDN2	303223_1	-0.485	10.289	-0.063	10.289
1	157902417	157903930	1:157902417..157903930	DEDD	38130_1	-0.242	10.527	0.265	10.527
1	157939841	157941719	1:157939841..157941719	Ufc1	37242_1	0.285	11.54	0.803	11.54
1	157951333	157954023	1:157951333..157954023	PPOX	504452_1	0.036	8.975	0.357	8.975
1	157954173	157960283	1:157954173..157960283	B4GALT3	767188_1	0.267	8.644	0.359	8.644
1	157982177	157997258	1:157982177..157997258	NDUFS2	125010_1	0.224	10.492	1.105	10.492
1	157998123	158002110	1:157998123..158002110	FCER1G	235155_1	-0.076	7.759	0.004	7.759
1	158005154	158006273	1:158005154..158006273	APOA2	242631_1	-3.957	9.668	-3.541	9.668
1	158008925	158013376	1:158008925..158013376	FLJ12770	813815_1	-0.229	8.589	0.71	8.589
1	158062323	158062984	1:158062323..158062984		1620649_1	0.06	7.68	0.071	7.68
1	158070137	158070585	1:158070137..158070585	CDC42EP1	156293_1	-0.312	9.295	-0.42	9.295
1	158087599	158092811	1:158087599..158092811	MPZ	1624878_1	0.122	8.847	0.124	8.847
1	158104978	158105337	1:158104978..158105337	SDHC	1392128_1	-0.067	7.544	-0.064	7.544
1	158104978	158105337	1:158104978..158105337	SDHC	197381_1	-0.156	10.986	1.191	10.986
1	158288305	158302409	1:158288305..158302409	FCGR2A	4536764_1	0.36	9.79	0.425	9.79
1	158324603	158332873	1:158324603..158332873	FCGR3A	280793_1	-0.007	8.809	-0.25	8.809
1	158378113	158378439	1:158378113..158378439	FCGR2B	241436_1	0.808	11.083	0.055	11.083
1	158411736	158415800	1:158411736..158415800	FREB	291929_1	-0.335	10.476	-0.802	10.476
1	158451225	158458610	1:158451225..158458610	DUSP12	505502_1	-0.217	10.545	-0.913	10.545
1	158658832	158659179	1:158658832..158659179	ATF6	158183_1	-0.266	9.733	-0.191	9.733
1	158658832	158659179	1:158658832..158659179	ATF6	1643207_1	0.094	8.225	0.109	8.225
1	158658832	158659179	1:158658832..158659179	ATF6	29169_1	0.071	8.571	0.223	8.571
1	158684640	158685389	1:158684640..158685389	OLFML2B	773477_1	0.396	7.844	0.058	7.844
1	158771221	159069902	1:158771221..159069902	CAPON	1642826_1	0.219	7.821	0.04	7.821
1	159075464	159078302	1:159075464..159078302	LOC284680	742738_1	0.017	7.367	-0.111	7.367
1	159226532	159231058	1:159226532..159231058	UHMK1	262542_1	0.012	7.981	0.219	7.981
1	159226532	159231058	1:159226532..159231058	UHMK1	787886_1	-0.025	7.867	0.008	7.867
1	159294550	159295202	1:159294550..159295202	UAP1	240694_1	-0.331	10.881	-0.61	10.881
1	159465058	159465710	1:159465058..159465710	DDR2	42188_1	-0.128	7.763	0.01	7.763
1	159503185	159503407	1:159503185..159503407	HSD17B7	256619_1	-0.167	12.43	-0.412	12.43
1	159770808	159778040	1:159770808..159778040	RGS4	48625_1	-0.386	7.672	-0.253	7.672
1	159843754	159904530	1:159843754..159904530	RGS5	322159_1	-0.208	8.545	0.057	8.545
1	159843754	159904530	1:159843754..159904530	RGS5	37225_1	-1.433	8.777	-1.284	8.777
1	161290260	161290622	1:161290260..161290622	PBX1	122997_1	-0.103	8.697	-0.346	8.697
1	161290260	161290622	1:161290260..161290622	PBX1	1736357_1	0.107	7.869	0.089	7.869
1	161290260	161290622	1:161290260..161290622	PBX1	193377_1	0.292	8.982	1.02	8.982
1	161290260	161290622	1:161290260..161290622	PBX1	182720_1	2.195	10.565	3.353	10.565
1	161290260	161290622	1:161290260..161290622	PBX1	741880_1	-0.07	7.837	0.146	7.837
1	161586150	161586939	1:161586150..161586939		23441_1	0.954	8.537	1.954	8.537
1	161919309	161919983	1:161919309..161919983	LMX1A	1839801_1	0.095	7.811	-0.054	7.811
1	162102008	162105607	1:162102008..162105607	RXRG	358433_1	-0.447	9.54	0.059	9.54
1	162343635	162344338	1:162343635..162344338	MGST3	120202_1	0.862	11.184	1.486	11.184
1	162343635	162344338	1:162343635..162344338	MGST3	123312_1	-0.575	12.549	-0.266	12.549
1	162363110	162399758	1:162363110..162399758	ALDH9A1	200529_1	0.084	11.397	0.671	11.397
1	162425185	162425876	1:162425185..162425876		229743_1	0.266	8.181	0.555	8.181
1	162444060	162469789	1:162444060..162469789	LOC54499	43747_1	0.574	12.453	0.921	12.453
1	162603487	162612512	1:162603487..162612512	UCK2	259341_1	-0.724	10.359	0.022	10.359
1	162761689	162762179	1:162761689..162762179		27459_1	0.087	7.722	0.047	7.722
1	163540381	163555367	1:163540381..163555367	POGK	2178823_1	0.439	11.114	0.331	11.114
1	163607947	163608077	1:163607947..163608077		1669222_1	0.042	7.698	0.131	7.698
1	163614100	163614653	1:163614100..163614653		251877_1	0.137	8.185	0.135	8.185
1	163753739	163791526	1:163753739..163791526	GPA33	1927045_1	-0.221	8.534	-0.056	8.534
1	163795180	163829503	1:163795180..163829503	LOC92235	301075_1	-0.109	7.82	0.011	7.82
1	163958793	163959241	1:163958793..163959241	POU2F1	192694_1	-0.052	9.57	0.098	9.57
1	163958793	163959241	1:163958793..163959241	POU2F1	1561171_1	0.03	7.373	-0.01	7.373
1	164121439	164122193	1:164121439..164122193		242700_1	-0.057	10.245	-0.283	10.245
1	164241914	164254657	1:164241914..164254657	CREG1	52549_1	-0.805	12.055	0.003	12.055
1	164409047	164409591	1:164409047..164409591		160488_1	0.228	10.417	0.391	10.417
1	164469291	164469739	1:164469291..164469739	MPZL1	1686424_1	0.013	7.918	0.163	7.918
1	164469291	164469739	1:164469291..164469739	MPZL1	110693_1	0.14	9.431	0.973	9.431
1	164620910	164636755	1:164620910..164636755	DKFZP564B167	729331_1	0.643	12.44	0.997	12.44
1	164620910	164636755	1:164620910..164636755	DKFZP564B167	128909_1	1.079	9.32	0.82	9.32
1	164764975	164765278	1:164764975..164765278	IQWD1	124112_1	0.085	7.786	-0.025	7.786
1	164764975	164765278	1:164764975..164765278	IQWD1	45037_1	-0.024	9.1	0.257	9.1
1	164781778	164785566	1:164781778..164785566	GPR161	28343_1	-0.612	8.233	-0.422	8.233
1	164781778	164785566	1:164781778..164785566	GPR161	1697364_1	-0.134	7.721	-0.115	7.721
1	164899284	164903003	1:164899284..164903003	MGC3794	1910456_1	-0.24	8.018	-0.127	8.018
1	164926903	164944036	1:164926903..164944036		23141_1	-0.611	10.578	0.685	10.578
1	164981935	165014935	1:164981935..165014935	TBX19	298263_1	0.05	9.01	0.106	9.01
1	165396363	165430086	1:165396363..165430086	DPT	153505_1	-0.009	7.945	-0.113	7.945
1	165846823	165847229	1:165846823..165847229	ATP1B1	2190252_1	0.49	11.661	0.377	11.661
1	165846823	165847229	1:165846823..165847229	ATP1B1	897950_1	0.024	12.761	1.097	12.761
1	165846823	165847229	1:165846823..165847229	ATP1B1	25433_1	0.345	10.994	-0.254	10.994
1	166095771	166128328	1:166095771..166128328	BLZF1	23012_1	0.143	12.587	0.751	12.587
1	166095771	166128328	1:166095771..166128328	BLZF1	271713_1	0.864	8.886	0.154	8.886
1	166095771	166128328	1:166095771..166128328	BLZF1	1624796_1	0.093	7.643	-0.003	7.643
1	166164122	166186672	1:166164122..166186672	SLC19A2	130060_1	0.088	9.831	0.087	9.831
1	166215066	166287379	1:166215066..166287379	F5	229509_1	-2.418	8.779	-2.001	8.779
1	166289747	166331065	1:166289747..166331065	SELP	108284_1	0.392	10.557	0.566	10.557
1	166391469	166412412	1:166391469..166412412	SELL	149910_1	-0.43	8.402	-0.283	8.402
1	166423439	166434861	1:166423439..166434861	SELE	186132_1	-0.217	10.562	-0.327	10.562
1	166485671	166553884	1:166485671..166553884	FLJ10706	767191_1	0.793	9.637	1.557	9.637
1	166493327	166495689	1:166493327..166495689	MGC9084	295781_1	0.161	9.861	0.144	9.861
1	166550423	166595066	1:166550423..166595066	PACE-1	724367_1	-0.594	10.396	-1.002	10.396
1	166622135	166756236	1:166622135..166756236	KIFAP3	2452669_1	0.065	7.483	-0.085	7.483
1	167232949	167254245	1:167232949..167254245	FLJ11752	121770_1	-0.457	8.265	-0.355	8.265
1	167372517	167372824	1:167372517..167372824	PRRX1	1962048_1	0.369	10.309	0.33	10.309
1	167372517	167372824	1:167372517..167372824	PRRX1	357056_1	-0.096	7.577	-0.045	7.577
1	167372517	167372824	1:167372517..167372824	PRRX1	278859_1	0.033	7.453	0.006	7.453
1	167372517	167372824	1:167372517..167372824	PRRX1	364554_1	0.181	7.943	0.193	7.943
1	167958534	167986774	1:167958534..167986774	FMO1	239807_1	-0.001	7.63	0.086	7.63
1	168187909	168188644	1:168187909..168188644	XTP2	214450_1	-0.301	11.54	-0.482	11.54
1	168187909	168188644	1:168187909..168188644	XTP2	133371_1	-0.008	12.65	0.963	12.65
1	168346058	168346379	1:168346058..168346379	MYOC	2140527_1	0.495	11.171	0.251	11.171
1	168442937	168445906	1:168442937..168445906	VAMP4	824059_1	0.426	10.288	0.599	10.288
1	168442937	168445906	1:168442937..168445906	VAMP4	49978_1	0.168	9.679	0.311	9.679
1	168488059	168488418	1:168488059..168488418	KIAA0859	125080_1	0.693	10.648	1.286	10.648
1	169121530	169131132	1:169121530..169131132	LOC92346	347725_1	0.778	11.698	0.813	11.698
1	169148468	169149187	1:169148468..169149187	PIGC	1737739_1	0.054	7.908	0.039	7.908
1	169148468	169149187	1:169148468..169149187	PIGC	1658128_1	0.024	7.841	0.2	7.841
1	169148468	169149187	1:169148468..169149187	PIGC	240194_1	0.316	10.74	0.268	10.74
1	169148468	169149187	1:169148468..169149187	PIGC	108786_1	0.01	7.412	0.018	7.412
1	169308421	169309117	1:169308421..169309117	C1orf9	161790_1	2.69	11.922	1.81	11.922
1	169359841	169367670	1:169359841..169367670	FASLG	4849770_1	-0.053	7.348	-0.074	7.348
1	170178142	170189603	1:170178142..170189603	PRDX6	207665_1	-0.312	11.176	-0.601	11.176
1	170309131	170370658	1:170309131..170370658	FLJ45235	1754191_1	0.065	7.526	0.052	7.526
1	170500352	170524926	1:170500352..170524926	dJ383J4.3	270331_1	-0.186	13.042	-0.295	13.042
1	170587637	170588245	1:170587637..170588245		1542006_1	0.151	7.667	0.051	7.667
1	170604603	170618130	1:170604603..170618130	SERPINC1	200355_1	-0.774	8.422	-0.84	8.422
1	170632008	170636970	1:170632008..170636970		182687_1	0.026	10.083	0.21	10.083
1	171556112	171557031	1:171556112..171557031	RABGAP1L	2141194_1	0.253	10.99	0.157	10.99
1	171556112	171557031	1:171556112..171557031	RABGAP1L	171986_1	0.054	9.648	0.599	9.648
1	171556112	171557031	1:171556112..171557031	RABGAP1L	242683_1	0.015	8.485	0.085	8.485
1	171556112	171557031	1:171556112..171557031	RABGAP1L	1542810_1	0.025	7.49	0.003	7.49
1	171711039	171711593	1:171711039..171711593	CACYBP	214311_1	0.479	13.026	0.994	13.026
1	171768650	171848859	1:171768650..171848859	TNN	1938827_1	0.039	7.677	0.142	7.677
1	171858326	171859323	1:171858326..171859323	KIAA0040	814054_1	1.398	9.398	1.228	9.398
1	172015989	172021404	1:172015989..172021404		175767_1	-0.002	7.638	-0.034	7.638
1	173476567	173476982	1:173476567..173476982	PAPPA2	244646_1	0.047	7.671	0.028	7.671
1	173476567	173476982	1:173476567..173476982	PAPPA2	142262_1	0.165	8.121	0.061	8.121
1	173630842	173631339	1:173630842..173631339	ASTN	176733_1	-0.003	7.667	0.007	7.667
1	173909172	173909390	1:173909172..173909390	KIAA1747	179426_1	0.076	7.695	0.072	7.695
1	175125733	175126212	1:175125733..175126212		221283_1	-0.04	10.296	-0.444	10.296
1	175181399	175181998	1:175181399..175181998		137645_1	-0.138	12.823	-0.244	12.823
1	175207678	175208276	1:175207678..175208276	FLJ44005	726675_1	0.071	7.601	0.118	7.601
1	175475869	175476499	1:175475869..175476499	RALGPS2	138515_1	1.173	9.812	0.906	9.812
1	175475869	175476499	1:175475869..175476499	RALGPS2	188331_1	0.55	8.183	0.26	8.183
1	175726687	175777354	1:175726687..175777354	FAM20B	25343_1	0.502	11.193	0.99	11.193
1	175804839	175843881	1:175804839..175843881	ABL2	45801_1	0.058	9.308	0.158	9.308
1	176032630	176033095	1:176032630..176033095	SOAT1	130109_1	-0.787	9.719	-0.767	9.719
1	176058646	176059472	1:176058646..176059472		111750_1	-0.933	9.519	-0.524	9.519
1	176443954	176516990	1:176443954..176516990	MGC16664	757386_1	0.972	9.782	0.563	9.782
1	176563229	176565246	1:176563229..176565246	LOC163590	47220_1	0.123	8.004	0.129	8.004
1	176563229	176565246	1:176563229..176565246	LOC163590	811844_1	0.035	8.832	0.155	8.832
1	176563229	176565246	1:176563229..176565246	LOC163590	205939_1	-0.081	9.482	0.014	9.482
1	176903933	176904802	1:176903933..176904802		160930_1	0.152	9.098	0.759	9.098
1	177332796	177587143	1:177332796..177587143	XPR1	34454_1	-0.05	9.029	0.225	9.029
1	177332796	177587143	1:177332796..177587143	XPR1	795185_1	0.167	10.403	0.184	10.403
1	177644831	177677275	1:177644831..177677275	STX6	795529_1	-0.014	9.955	0.485	9.955
1	177650491	177655680	1:177650491..177655680		248556_1	0.047	7.437	0.102	7.437
1	177734812	177757346	1:177734812..177757346	MR1	785372_1	-0.157	13.358	-0.274	13.358
1	177789294	177791631	1:177789294..177791631	IER5	111801_1	-1.011	11.068	-0.394	11.068
1	178184537	178499749	1:178184537..178499749	CACNA1E	41547_1	-0.02	7.351	-0.115	7.351
1	178828102	178829457	1:178828102..178829457		727683_1	0.088	7.356	0.062	7.356
1	179078890	179079499	1:179078890..179079499		1660320_1	-0.022	8.75	-0.074	8.75
1	179084083	179085230	1:179084083..179085230	GLUL	4837475_1	-0.007	7.188	-0.011	7.188
1	179274907	179275654	1:179274907..179275654	RNASEL	321167_1	0.324	8.761	0.906	8.761
1	179299414	179305200	1:179299414..179305200	RGS16	813707_2	-0.165	8.407	-0.362	8.407
1	179299414	179305200	1:179299414..179305200	RGS16	813707_3	-0.077	7.76	-0.156	7.76
1	179299414	179305200	1:179299414..179305200	RGS16	813707_1	0.057	7.467	0.008	7.467
1	179343053	179344063	1:179343053..179344063	RGS8	40724_1	-0.134	8.242	0.384	8.242
1	179511624	179512282	1:179511624..179512282	NPL	1849882_1	-0.011	7.518	-0.039	7.518
1	179511624	179512282	1:179511624..179512282	NPL	126321_1	0.043	7.7	0.059	7.7
1	179511624	179512282	1:179511624..179512282	NPL	144968_1	0.126	8.081	0.231	8.081
1	179535541	179536005	1:179535541..179536005		121808_2	-0.079	10.194	-0.27	10.194
1	179535541	179536005	1:179535541..179536005		121808_1	0.015	10.47	-0.084	10.47
1	179565364	179565867	1:179565364..179565867	DHX9	838373_1	0.012	7.437	0.015	7.437
1	179726449	179727123	1:179726449..179727123	LAMC1	133613_1	-0.078	7.536	0.039	7.536
1	179726449	179727123	1:179726449..179727123	LAMC1	2218563_1	0.551	10.36	0.409	10.36
1	179934016	179934449	1:179934016..179934449	LAMC2	6720495_1	-0.092	7.403	-0.032	7.403
1	179934016	179934449	1:179934016..179934449	LAMC2	460403_1	0.018	7.308	0.081	7.308
1	180056334	180056724	1:180056334..180056724	NMNAT2	24938_1	0.113	12.972	0.594	12.972
1	180170814	180173057	1:180170814..180173057	DKFZP564C196	1560374_1	0.136	8.042	0.157	8.042
1	180240754	180241211	1:180240754..180241211	C1orf16	1558489_1	0.091	7.87	0.112	7.87
1	180240754	180241211	1:180240754..180241211	C1orf16	23108_1	0.037	9.97	0.416	9.97
1	180240754	180241211	1:180240754..180241211	C1orf16	273233_1	0.085	7.537	0.107	7.537
1	180327008	180327759	1:180327008..180327759	ARPC5	340558_1	-0.008	8.356	-0.074	8.356
1	180347197	180354105	1:180347197..180354105	MGC26594	727279_1	0.021	7.541	0.103	7.541
1	180593572	180593772	1:180593572..180593772	RGL1	360212_1	-0.422	10.02	-0.31	10.02
1	180593572	180593772	1:180593572..180593772	RGL1	1839853_1	-0.06	7.389	-0.051	7.389
1	180632478	180635060	1:180632478..180635060		47452_1	-0.412	10.307	-0.909	10.307
1	181112723	181113368	1:181112723..181113368	C1orf21	280719_1	-0.299	8.461	0.127	8.461
1	181495729	181496392	1:181495729..181496392	C1orf24	502415_1	-0.267	10.136	-0.885	10.136
1	181746208	181803397	1:181746208..181803397	RNF2	141298_1	-0.222	8.786	-0.084	8.786
1	181870896	181873325	1:181870896..181873325	C1orf26	257385_1	-0.161	8.559	-0.136	8.559
1	182012441	182012997	1:182012441..182012997	IVNS1ABP	193579_1	-0.028	10.868	0.036	10.868
1	182997646	183015345	1:182997646..183015345	PRG4	1894237_1	0.658	9.127	0.772	9.127
1	183025062	183025563	1:183025062..183025563	TPR	128159_1	0	9.374	-0.453	9.374
1	183103369	183103865	1:183103369..183103865	C1orf27	145432_1	0.039	7.974	0.112	7.974
1	183372625	183381213	1:183372625..183381213	PTGS2	147050_1	-2.492	9.001	-1.797	9.001
1	183677153	183677827	1:183677153..183677827	PLA2G4A	2441537_1	0.568	12.22	0.506	12.22
1	187179407	187181517	1:187179407..187181517		1750518_1	-0.118	8.368	0.186	8.368
1	189339955	189340363	1:189339955..189340363	RGS13	239446_1	-0.052	7.253	-0.008	7.253
1	189509825	189513057	1:189509825..189513057	RGS2	21531_1	-2.217	8.929	-1.976	8.929
1	189717647	189717967	1:189717647..189717967	UCHL5	1030234_2	-0.094	9.15	-0.026	9.15
1	189717647	189717967	1:189717647..189717967	UCHL5	1030234_3	-0.031	9.036	-0.001	9.036
1	189717647	189717967	1:189717647..189717967	UCHL5	1030234_4	0.028	9.186	0.016	9.186
1	189717647	189717967	1:189717647..189717967	UCHL5	1030234_1	-0.337	10.987	-0.339	10.987
1	189717647	189717967	1:189717647..189717967	UCHL5	173087_1	0.112	10.006	0.482	10.006
1	189760820	189786772	1:189760820..189786772	SSA2	430218_1	0.027	7.762	-0.038	7.762
1	189806302	189806811	1:189806302..189806811	GLRX2	731044_1	-0.001	9.911	0.202	9.911
1	189879831	189880756	1:189879831..189880756	B3GALT2	49019_1	-0.092	7.498	-0.064	7.498
1	189944811	189945350	1:189944811..189945350	HRPT2	1557824_1	0.096	7.649	0.02	7.649
1	189944811	189945350	1:189944811..189945350	HRPT2	143828_1	0.371	10.044	-0.134	10.044
1	189944811	189945350	1:189944811..189945350	HRPT2	39598_1	-0.487	11.386	-0.974	11.386
1	189960372	189960756	1:189960372..189960756		1694525_1	-0.022	7.858	0.033	7.858
1	193276032	193276777	1:193276032..193276777	SLICK	38677_1	0.033	8.712	0.275	8.712
1	193526271	193531468	1:193526271..193531468	CFHL1	450060_1	0.299	11.231	-0.251	11.231
1	193785110	193847224	1:193785110..193847224	ASPM	1354125_1	0.029	7.551	-0.107	7.551
1	193902329	193902936	1:193902329..193902936		1639325_1	0.414	7.96	0.009	7.96
1	193985005	193985743	1:193985005..193985743	CRB1	248485_1	0.022	7.569	0.06	7.569
1	195020726	195023207	1:195020726..195023207	NEK7	201151_1	0.047	7.993	-0.128	7.993
1	195224008	195241732	1:195224008..195241732	ATP6V1G3	1590213_1	0.063	8.247	0.124	8.247
1	195349441	195349918	1:195349441..195349918	PTPRC	120305_1	0.086	8.106	0.126	8.106
1	195349441	195349918	1:195349441..195349918	PTPRC	1625354_1	-0.036	7.43	-0.087	7.43
1	195349441	195349918	1:195349441..195349918	PTPRC	46644_1	-2.752	8.594	-2.113	8.594
1	195503003	195503649	1:195503003..195503649		134080_1	0.082	7.743	0.03	7.743
1	196766634	196767288	1:196766634..196767288	NR5A2	245517_1	-0.399	9.816	-0.562	9.816
1	197027176	197027878	1:197027176..197027878		310031_1	-0.194	9.752	-0.35	9.752
1	197107063	197110823	1:197107063..197110823	ZNF281	252501_1	0.782	10.517	-0.077	10.517
1	197252963	197321519	1:197252963..197321519	KIF14	739983_1	-0.609	10.756	-0.291	10.756
1	197440342	197561489	1:197440342..197561489	KIAA1078	145143_1	0.274	9.935	0.839	9.935
1	197614999	197616520	1:197614999..197616520	FLJ10901	2457901_1	-0.01	7.739	0.187	7.739
1	197670176	197691744	1:197670176..197691744	KIF21B	25900_1	-0.005	7.548	0.028	7.548
1	197726205	197729577	1:197726205..197729577		1639319_1	0.128	9.556	0.018	9.556
1	197922903	197923908	1:197922903..197923908	DKFZp434B1231	201102_1	-0.293	7.741	-0.197	7.741
1	198070347	198070777	1:198070347..198070777	TNNT2	298062_1	0.074	7.896	-0.011	7.896
1	198080172	198080643	1:198080172..198080643		2155579_1	0.413	11.478	0.247	11.478
1	198081998	198082680	1:198081998..198082680	LAD1	121551_1	-0.029	8.268	-0.118	8.268
1	198115890	198116557	1:198115890..198116557	TNNI1	2250313_1	0.07	7.763	0.056	7.763
1	198115890	198116557	1:198115890..198116557	TNNI1	297956_1	0.031	7.548	-0.107	7.548
1	198165167	198165942	1:198165167..198165942		309657_1	0.018	13.453	0.017	13.453
1	198169437	198169892	1:198169437..198169892	PHLDA3	429283_1	0.4	8.739	0.457	8.739
1	198184314	198189619	1:198184314..198189619	CSRP1	809964_1	0.655	9.858	0.652	9.858
1	198386748	198387333	1:198386748..198387333	NAV1	486984_1	0.111	8.522	-0.265	8.522
1	198562576	198562823	1:198562576..198562823	IPO9	195052_1	-0.015	10.01	0.127	10.01
1	198562576	198562823	1:198562576..198562823	IPO9	24672_1	0.227	7.795	0.302	7.795
1	198589479	198589852	1:198589479..198589852	C1orf40	308223_1	0.24	8.017	-0.133	8.017
1	198646863	198647173	1:198646863..198647173	LMOD1	1851116_1	0.039	7.391	-0.008	7.391
1	198663000	198671135	1:198663000..198671135	TIMM17A	506032_1	-0.606	10.35	-0.225	10.35
1	198687914	198688247	1:198687914..198688247	RNPEP	139573_1	0.121	8.287	0.458	8.287
1	198708729	198716790	1:198708729..198716790	ELF3	756631_1	1.18	9.655	2.181	9.655
1	198708729	198716790	1:198708729..198716790	ELF3	770910_1	-0.191	9.778	1.958	9.778
1	198843718	198844355	1:198843718..198844355	ARL10B	25455_1	1.149	8.957	1.216	8.957
1	198847797	198862366	1:198847797..198862366	PTPN7	686081_2	0.173	8.28	0.215	8.28
1	198847797	198862366	1:198847797..198862366	PTPN7	686081_1	0.035	7.352	-0.095	7.352
1	199194862	199195367	1:199194862..199195367	PPP1R12B	280670_1	0.156	10.403	0.766	10.403
1	199194862	199195367	1:199194862..199195367	PPP1R12B	810272_1	0.193	8.042	0.29	8.042
1	199426116	199426960	1:199426116..199426960		123261_1	0.02	7.733	0.004	7.733
1	199496574	199497037	1:199496574..199497037	JARID1B	127619_1	0.207	11.19	1.029	11.19
1	199579741	199589920	1:199579741..199589920	RABIF	24954_1	0.307	9.893	0.065	9.893
1	199610353	199611420	1:199610353..199611420	KLHL12	280630_1	-0.093	11.544	0.252	11.544
1	199662660	199666169	1:199662660..199666169	NQO3A2	321288_1	1.103	10.65	0.694	10.65
1	199718188	199718390	1:199718188..199718390	C1orf37	124391_1	0.152	8.335	-0.016	8.335
1	199751967	199779520	1:199751967..199779520	PPFIA4	180601_1	-0.739	8.566	-0.472	8.566
1	199751967	199779520	1:199751967..199779520	PPFIA4	222285_1	-0.245	11.693	-0.504	11.693
1	199827849	199868189	1:199827849..199868189	ADORA1	30159_1	0.211	8.022	0.19	8.022
1	199879720	199883432	1:199879720..199883432	CHI3L1	156920_1	-0.132	8.928	-0.411	8.928
1	199913615	199973594	1:199913615..199973594	CHIT1	1707107_1	-0.006	7.575	0.044	7.575
1	200008736	200010385	1:200008736..200010385	BTG2	32510_1	-0.363	8.386	-0.271	8.386
1	200008736	200010385	1:200008736..200010385	BTG2	213136_2	-0.036	7.561	-0.019	7.561
1	200008736	200010385	1:200008736..200010385	BTG2	213136_1	0.092	7.282	-0.03	7.282
1	200041413	200042162	1:200041413..200042162	FMOD	44276_1	-0.158	7.753	0.755	7.753
1	200176539	200192137	1:200176539..200192137	PRELP	160373_1	0.25	7.582	0.063	7.582
1	200327345	200444866	1:200327345..200444866	ATP2B4	307873_1	0.036	7.577	-0.083	7.577
1	200499651	200500138	1:200499651..200500138	KIAA0663	1845938_1	0.091	7.684	0.166	7.684
1	200499651	200500138	1:200499651..200500138	KIAA0663	327299_1	-0.04	7.616	0.069	7.616
1	200499651	200500138	1:200499651..200500138	KIAA0663	342380_1	-0.11	8.65	-0.279	8.65
1	200773902	200828528	1:200773902..200828528	SOX13	129348_1	-0.143	9.502	0.092	9.502
1	200844025	200845982	1:200844025..200845982	ETNK2	29797_1	1.28	8.508	0.728	8.508
1	200855600	200867104	1:200855600..200867104	REN	813402_1	-0.014	7.461	0.061	7.461
1	200969378	200969657	1:200969378..200969657	PLEKHA6	139426_1	-0.058	7.566	0.019	7.566
1	201107943	201108353	1:201107943..201108353	PPP1R15B	1678376_1	0.05	7.692	0.02	7.692
1	201107943	201108353	1:201107943..201108353	PPP1R15B	133374_1	1.365	12.097	0.863	12.097
1	201175500	201179601	1:201175500..201179601	PIK3C2B	461327_2	0.311	9.481	0.191	9.481
1	201175500	201179601	1:201175500..201179601	PIK3C2B	2312437_1	0.762	10.655	-0.211	10.655
1	201175500	201179601	1:201175500..201179601	PIK3C2B	461327_1	0.704	7.939	0.184	7.939
1	201236945	201237523	1:201236945..201237523	MDM4	1185002_1	-0.18	8.908	-0.509	8.908
1	201236945	201237523	1:201236945..201237523	MDM4	49555_1	-0.04	8.545	-0.188	8.545
1	201317959	201386138	1:201317959..201386138	LRRN5	47504_1	0.604	7.936	0.07	7.936
1	201621416	201719153	1:201621416..201719153	NFASC	174523_1	-0.336	11.63	-0.65	11.63
1	201621416	201719153	1:201621416..201719153	NFASC	726743_1	0.505	10.55	0.277	10.55
1	201774480	201775037	1:201774480..201775037	CNTN2	28510_1	-0.43	9.781	-0.56	9.781
1	201774480	201775037	1:201774480..201775037	CNTN2	50886_1	-0.035	7.929	0.059	7.929
1	201783913	201785245	1:201783913..201785245	LOC388730	1682597_1	0.189	8.581	-0.009	8.581
1	201788636	201788874	1:201788636..201788874	RBBP5	824863_1	-0.349	10.879	-0.551	10.879
1	202002849	202003682	1:202002849..202003682	C11orf17	1390719_1	0.118	8.171	0.176	8.171
1	202032986	202033454	1:202032986..202033454		1686940_1	-0.074	8.588	-0.055	8.588
1	202135670	202138664	1:202135670..202138664	LEMD1	731047_1	-0.173	8.921	-0.52	8.921
1	202216135	202233572	1:202216135..202233572	PCTK3	362834_1	0.117	7.573	-0.083	7.573
1	202216135	202233572	1:202216135..202233572	PCTK3	725677_1	0.042	7.264	-0.036	7.264
1	202331153	202331374	1:202331153..202331374	ELK4	1638030_1	0.091	7.84	-0.253	7.84
1	202331153	202331374	1:202331153..202331374	ELK4	39725_1	-0.48	12.141	-0.595	12.141
1	202358635	202381230	1:202358635..202381230	PCANAP6	308595_1	0.93	10.748	0.636	10.748
1	202860558	202875171	1:202860558..202875171	CTSE	229419_1	-0.104	7.639	-0.032	7.639
1	203032190	203058617	1:203032190..203058617	IKBKE	364448_1	-0.007	7.377	0.046	7.377
1	203123068	203123262	1:203123068..203123262	RASSF5	294283_1	-0.471	10.747	-0.275	10.747
1	203197568	203210854	1:203197568..203210854	DYRK3	428049_1	-0.508	8.053	-0.214	8.053
1	203295352	203296021	1:203295352..203296021	MAPKAPK2	155628_1	-0.648	9.95	-0.085	9.95
1	203329349	203334234	1:203329349..203334234	IL10	4691490_1	0.03	7.323	0.112	7.323
1	203459183	203465879	1:203459183..203465879	IL24	712049_1	0.044	11.407	0.596	11.407
1	203519748	203531889	1:203519748..203531889	FCA/MR	2028616_1	-0.078	7.609	0.001	7.609
1	203580261	203594487	1:203580261..203594487	SARG	726225_1	-0.093	11.056	0.462	11.056
1	203580261	203594487	1:203580261..203594487	SARG	1928691_1	-0.044	10.045	0.68	10.045
1	203635273	203638679	1:203635273..203638679	PFKFB2	53158_1	-0.483	11.563	-0.643	11.563
1	203650978	203661730	1:203650978..203661730	C4BPB	233067_1	-2.348	8.71	-2.037	8.71
1	203650978	203661730	1:203650978..203661730	C4BPB	207497_1	-0.054	7.917	-0.003	7.917
1	203666001	203706709	1:203666001..203706709	C4BPA	123664_1	0.032	7.937	0.038	7.937
1	203886577	203887074	1:203886577..203887074	DAF	142898_1	-0.088	13.088	-1.084	13.088
1	203886577	203887074	1:203886577..203887074	DAF	2255833_1	0.62	12.387	0.597	12.387
1	204042196	204042669	1:204042196..204042669	CR2	814917_1	-0.064	7.907	0.119	7.907
1	204057896	204202381	1:204057896..204202381	CR1	293430_1	-0.292	13.194	-0.519	13.194
1	204212897	204213387	1:204212897..204213387	CR1L	66327_1	-2.107	8.514	-1.631	8.514
1	204329070	204332100	1:204329070..204332100	MCP	796994_2	1.233	12.201	1.16	12.201
1	204329070	204332100	1:204329070..204332100	MCP	796994_1	1.371	12.313	1.218	12.313
1	204363261	204365820	1:204363261..204365820		153617_1	1.235	9.764	1.365	9.764
1	204380118	204384321	1:204380118..204384321		1640506_1	-0.016	7.574	-0.034	7.574
1	204443217	204447650	1:204443217..204447650	CD34	487462_1	0.275	7.87	0.333	7.87
1	204584007	204587352	1:204584007..204587352	PLXNA2	130104_1	-0.373	11.37	-0.673	11.37
1	204754615	204754878	1:204754615..204754878	PLXNA2	230397_2	0.434	7.834	0.073	7.834
1	204754615	204754878	1:204754615..204754878	PLXNA2	230397_1	-0.191	8.166	-0.514	8.166
1	204754615	204754878	1:204754615..204754878	PLXNA2	303035_1	-0.066	7.572	-0.132	7.572
1	205534207	205537047	1:205534207..205537047		757909_1	0.054	7.819	-0.142	7.819
1	205990559	205994285	1:205990559..205994285		2065563_1	1.599	8.868	0.351	8.868
1	206145456	206175678	1:206145456..206175678	CAMK1G	29500_1	0.066	7.94	0.211	7.94
1	206190932	206191240	1:206190932..206191240	LAMB3	2266734_1	-0.432	8.705	0.367	8.705
1	206237149	206237678	1:206237149..206237678	G0S2	1572233_1	0.034	12.412	0.703	12.412
1	206237149	206237678	1:206237149..206237678	G0S2	1609953_1	-0.27	7.596	-0.356	7.596
1	206248551	206249045	1:206248551..206249045	HSD11B1	505059_1	-0.089	7.382	-0.088	7.382
1	206352825	206353248	1:206352825..206353248	FLJ25078	1550703_1	-0.047	8.431	0.403	8.431
1	206389794	206413817	1:206389794..206413817	MGC29875	293038_1	0.016	7.598	-0.049	7.598
1	206514463	206726031	1:206514463..206726031	SYT14	1841743_1	0.064	7.987	-0.024	7.987
1	206794589	206804855	1:206794589..206804855	SERTAD4	772907_1	2.038	9.047	1.471	9.047
1	206794589	206804855	1:206794589..206804855	SERTAD4	257999_1	2.454	10.041	2.48	10.041
1	206891038	207238026	1:206891038..207238026	HHAT	347616_1	1.216	12.314	1.719	12.314
1	207861854	207862237	1:207861854..207862237	RCOR3	150711_1	0.94	9.707	0.742	9.707
1	207928312	207928900	1:207928312..207928900	TRAF5	322792_1	-0.517	10.498	-0.933	10.498
1	208038258	208053871	1:208038258..208053871	C1orf36	220793_1	0.018	9.771	-0.241	9.771
1	208139817	208140476	1:208139817..208140476	SLC30A1	281998_1	0.146	9.418	0.295	9.418
1	208224508	208237355	1:208224508..208237355	NEK2	198104_1	1.194	13.653	0.96	13.653
1	208387636	208388379	1:208387636..208388379	LPGAT1	47619_1	1.121	9.705	1.054	9.705
1	208578836	208579304	1:208578836..208579304	DKFZP434B168	2187875_1	0.406	9.483	0.175	9.483
1	208578836	208579304	1:208578836..208579304	DKFZP434B168	767761_1	0.398	9.559	0.574	9.559
1	208597525	208666581	1:208597525..208666581	RAMP	126650_2	-0.219	10.512	0.574	10.512
1	208597525	208666581	1:208597525..208666581	RAMP	1578965_1	-0.197	9.644	-0.36	9.644
1	208597525	208666581	1:208597525..208666581	RAMP	126650_3	-0.051	10.761	0.797	10.761
1	208597525	208666581	1:208597525..208666581	RAMP	126650_4	-0.022	10.854	0.937	10.854
1	208597525	208666581	1:208597525..208666581	RAMP	126650_1	-0.118	10.749	0.798	10.749
1	208940997	208941617	1:208940997..208941617	FLJ10874	824682_1	-0.088	10.798	0.194	10.798
1	209119755	209120569	1:209119755..209120569		3218708_1	1.165	8.345	0.634	8.345
1	209177544	209179876	1:209177544..209179876	ATF3	51448_1	-1.244	9.043	0.166	9.043
1	209186210	209188512	1:209186210..209188512	FLJ32796	1619744_1	-0.253	7.79	-0.141	7.79
1	209311106	209311691	1:209311106..209311691	C1orf48	38115_1	-0.121	8.01	-0.102	8.01
1	209311106	209311691	1:209311106..209311691	C1orf48	137370_1	0.202	9.033	0.573	9.033
1	209391881	209409363	1:209391881..209409363		1755066_1	0.044	7.762	0.036	7.762
1	209459300	209461098	1:209459300..209461098	FLVCR	300095_1	-0.204	11.822	-0.147	11.822
1	209512371	209552656	1:209512371..209552656	FLJ12505	1707965_1	-0.391	11.036	-0.867	11.036
1	209554192	209577562	1:209554192..209577562	LOC90806	256483_1	0.026	9.271	-0.173	9.271
1	209554192	209577562	1:209554192..209577562	LOC90806	186144_1	0.021	10.686	1.372	10.686
1	209612991	209835203	1:209612991..209835203	RPS6KC1	173354_1	-0.239	9.368	0.27	9.368
1	209612991	209835203	1:209612991..209835203	RPS6KC1	125059_1	-0.82	9.04	-0.302	9.04
1	209612991	209835203	1:209612991..209835203	RPS6KC1	293276_1	-0.084	8.417	0.218	8.417
1	210550254	210598167	1:210550254..210598167	PROX1	220293_1	0.274	9.222	0.16	9.222
1	210550254	210598167	1:210550254..210598167	PROX1	295153_1	-0.11	7.672	0.04	7.672
1	210842839	210898869	1:210842839..210898869	SMYD2	127841_1	0.028	7.565	0.008	7.565
1	210842839	210898869	1:210842839..210898869	SMYD2	35905_1	0.074	11.175	0.761	11.175
1	211028062	211028841	1:211028062..211028841		124241_1	0.017	11.929	-0.388	11.929
1	211751607	211752031	1:211751607..211752031	KCNK2	41905_1	-0.684	7.943	0.271	7.943
1	213386227	213386716	1:213386227..213386716	ESRRG	745900_1	0.027	7.906	-0.162	7.906
1	213386227	213386716	1:213386227..213386716	ESRRG	305966_1	0.394	7.754	-0.063	7.754
1	213988734	213990604	1:213988734..213990604		2446686_1	0.04	7.562	-0.017	7.562
1	214080170	214080836	1:214080170..214080836	GPATC2	240318_1	-0.039	8.425	-0.247	8.425
1	214080170	214080836	1:214080170..214080836	GPATC2	243932_1	0.236	8.893	-0.194	8.893
1	214080170	214080836	1:214080170..214080836	GPATC2	232723_1	0.043	7.417	0.064	7.417
1	214276967	214277420	1:214276967..214277420	LOC128153	785693_1	0.49	9.029	0.621	9.029
1	214889243	214889691	1:214889243..214889691	CGI-115	324847_1	0.228	11.441	0.282	11.441
1	214903110	214903690	1:214903110..214903690	TGFB2	281778_1	-0.26	11.728	-0.515	11.728
1	214903110	214903690	1:214903110..214903690	TGFB2	325284_1	0.005	7.99	0.028	7.99
1	214903110	214903690	1:214903110..214903690	TGFB2	36472_1	-1.315	8.1	-0.433	8.1
1	214903110	214903690	1:214903110..214903690	TGFB2	2179954_1	0.602	11.869	0.648	11.869
1	215751391	215752059	1:215751391..215752059	LYPLAL1	1961740_1	0.742	11.234	0.792	11.234
1	215751391	215752059	1:215751391..215752059	LYPLAL1	1738797_1	-0.014	7.701	0.022	7.701
1	215971273	215972005	1:215971273..215972005		1733075_1	-0.017	7.621	0.032	7.621
1	216247163	216520384	1:216247163..216520384	SLC30A10	25930_1	-0.106	7.978	-0.106	7.978
1	216547306	216547779	1:216547306..216547779	EPRS	949914_1	0.982	11.637	0.734	11.637
1	216625770	216626491	1:216625770..216626491	BPNT1	824544_1	-0.278	10.013	-0.531	10.013
1	216625770	216626491	1:216625770..216626491	BPNT1	144784_2	0.29	10.495	0.015	10.495
1	216625770	216626491	1:216625770..216626491	BPNT1	144784_1	-0.059	10.831	-0.385	10.831
1	216655849	216709778	1:216655849..216709778	FLJ10326	758113_1	-0.317	13.055	1.003	13.055
1	217259853	217261176	1:217259853..217261176	FLJ14146	131887_1	-0.434	8.814	1.053	8.814
1	217369320	217369499	1:217369320..217369499	FLJ22390	753991_1	-1.064	9.235	-0.294	9.235
1	218301588	218302168	1:218301588..218302168	DUSP10	273122_1	0.307	9.242	0.031	9.242
1	219083996	219109825	1:219083996..219109825	FLJ13840	1392125_1	-0.104	8.317	0.065	8.317
1	219119617	219151650	1:219119617..219151650	TAF1A	278626_1	0.246	10.537	0.222	10.537
1	219780035	219809810	1:219780035..219809810	FLJ10052	161594_1	1.385	10.717	1.695	10.717
1	219780035	219809810	1:219780035..219809810	FLJ10052	1581180_1	0.081	7.742	0.344	7.742
1	220252060	220270274	1:220252060..220270274	CAPN2	23643_2	-3.934	11.317	0.261	11.317
1	220252060	220270274	1:220252060..220270274	CAPN2	23643_3	-3.054	10.811	0.946	10.811
1	220252060	220270274	1:220252060..220270274	CAPN2	23643_4	-2.931	10.67	0.847	10.67
1	220252060	220270274	1:220252060..220270274	CAPN2	23643_1	-2.868	10.731	0.882	10.731
1	220275932	220276591	1:220275932..220276591	TP53BP2	212198_1	-1.056	9.575	-0.081	9.575
1	220275932	220276591	1:220275932..220276591	TP53BP2	1675760_1	-0.015	8.725	-0.097	8.725
1	220340581	220340812	1:220340581..220340812		2149767_1	0.19	7.715	0.118	7.715
1	220340581	220340812	1:220340581..220340812		1557084_1	-0.159	7.864	0.029	7.864
1	220608772	220656483	1:220608772..220656483	FBXO28	246528_1	-0.128	8.619	-0.17	8.619
1	220677662	220687878	1:220677662..220687878	DEGS1	196157_1	-0.584	12.03	-0.42	12.03
1	220792802	220793230	1:220792802..220793230	NVL	768945_1	-0.155	10.374	0.396	10.374
1	220851344	220873878	1:220851344..220873878	HSPC163	149962_1	0.84	10.014	1.079	10.014
1	220851344	220873878	1:220851344..220873878	HSPC163	125199_1	0.902	8.7	0.542	8.7
1	220889486	220890115	1:220889486..220890115	WDR26	108811_1	-0.035	8.307	-0.168	8.307
1	220889486	220890115	1:220889486..220890115	WDR26	204390_1	-0.241	12.052	-0.598	12.052
1	220889486	220890115	1:220889486..220890115	WDR26	279007_1	-0.243	10.901	-0.117	10.901
1	220889486	220890115	1:220889486..220890115	WDR26	268250_1	0.312	11.883	0.384	11.883
1	220952242	220955131	1:220952242..220955131		242135_1	0.024	7.855	0.002	7.855
1	220952242	220955131	1:220952242..220955131		1642050_1	-0.038	7.93	0.465	7.93
1	221424118	221519041	1:221424118..221519041	MGC27277	2392091_1	-0.183	8.273	-0.266	8.273
1	221612256	221612967	1:221612256..221612967		173564_1	-0.127	8.094	-0.141	8.094
1	221612256	221612967	1:221612256..221612967		122919_1	0.069	9.137	-0.261	9.137
1	221895938	221922519	1:221895938..221922519	LBR	280619_1	-1.511	11.072	-0.775	11.072
1	222044525	222045207	1:222044525..222045207	ENAH	342680_1	0.186	9.001	0.143	9.001
1	222044525	222045207	1:222044525..222045207	ENAH	124369_1	0.328	8.702	0.241	8.702
1	222195040	222246680	1:222195040..222246680		1621118_1	0.135	7.931	0.072	7.931
1	222272300	222284899	1:222272300..222284899	SRP9	32257_1	1.524	14.53	1.058	14.53
1	222319710	222339996	1:222319710..222339996	EPHX1	49995_1	0.051	8.471	-0.007	8.471
1	222354097	222360646	1:222354097..222360646	KIAA0792	1391653_1	0.03	8.841	-0.235	8.841
1	222430845	222431992	1:222430845..222431992	LEFTY2	488962_1	-0.421	7.987	-0.469	7.987
1	222642438	222649464	1:222642438..222649464	ACBD3	305718_1	0.59	9.762	0.363	9.762
1	222725595	222803933	1:222725595..222803933	LIN9	122872_2	-0.446	9.761	-0.067	9.761
1	222725595	222803933	1:222725595..222803933	LIN9	122872_3	-0.135	9.205	-0.304	9.205
1	222725595	222803933	1:222725595..222803933	LIN9	122872_4	-0.269	9.248	-0.558	9.248
1	222725595	222803933	1:222725595..222803933	LIN9	122872_1	-0.115	9.104	-0.505	9.104
1	222855240	222902526	1:222855240..222902526	PARP1	2222800_1	0.131	7.533	0.033	7.533
1	223135152	223135598	1:223135152..223135598	ITPKB	824427_1	-0.614	8.907	-0.31	8.907
1	223365703	223390534	1:223365703..223390534	PSEN2	128731_1	0.377	8.715	0.521	8.715
1	223470934	223471608	1:223470934..223471608	CABC1	299688_1	0.259	10.697	0.222	10.697
1	223470934	223471608	1:223470934..223471608	CABC1	291695_1	-0.036	9.928	-0.058	9.928
1	223728508	223729271	1:223728508..223729271	CDC42BPA	199291_1	-0.021	7.603	-0.054	7.603
1	223728508	223729271	1:223728508..223729271	CDC42BPA	32385_2	-0.513	8.643	-0.267	8.643
1	223728508	223729271	1:223728508..223729271	CDC42BPA	32385_3	-0.103	7.94	-0.155	7.94
1	223728508	223729271	1:223728508..223729271	CDC42BPA	32385_4	-0.19	7.894	-0.084	7.894
1	223728508	223729271	1:223728508..223729271	CDC42BPA	32385_1	-0.128	7.88	-0.099	7.88
1	223728508	223729271	1:223728508..223729271	CDC42BPA	272711_1	0.051	7.727	0.048	7.727
1	223728508	223729271	1:223728508..223729271	CDC42BPA	1252770_1	-0.035	7.355	-0.072	7.355
1	224155673	224156897	1:224155673..224156897	MGC42493	150793_1	0.115	8.856	0.327	8.856
1	224229871	224271405	1:224229871..224271405	IMAGE3451454	345724_1	-0.006	10.399	0.377	10.399
1	224413092	224442366	1:224413092..224442366	WNT9A	1756654_1	0.164	7.881	0.12	7.881
1	224584285	224588197	1:224584285..224588197	ARF1	323474_2	0.052	7.475	0.081	7.475
1	224584285	224588197	1:224584285..224588197	ARF1	323474_1	0.085	7.837	0.246	7.837
1	224595168	224599847	1:224595168..224599847	C1orf35	926361_1	0.57	13.051	0.845	13.051
1	224639382	224643379	1:224639382..224643379	GUK1	824527_1	1.156	8.98	0.916	8.98
1	224660644	224670817	1:224660644..224670817	LOC200205	757918_1	0.252	8.902	-0.179	8.902
1	224761353	224762035	1:224761353..224762035	OBSCN	2345272_1	0.125	8.981	-0.05	8.981
1	224889969	224892860	1:224889969..224892860	TRIM11	727295_1	0.082	8.484	0.11	8.484
1	224889969	224892860	1:224889969..224892860	TRIM11	24843_1	0.06	8.789	0.949	8.789
1	224981011	224989405	1:224981011..224989405	LOC149603	811053_1	0.016	7.614	0.056	7.614
1	225183083	225183577	1:225183083..225183577	RHOU	127900_1	-0.654	9.642	-0.145	9.642
1	225701150	225713485	1:225701150..225713485		1644058_1	0.064	7.922	0.137	7.922
1	225873730	225876576	1:225873730..225876576	ACTA1	1757035_1	-0.004	7.564	-0.046	7.564
1	225873730	225876576	1:225873730..225876576	ACTA1	299658_1	-0.486	9.98	0.04	9.98
1	225883779	225950823	1:225883779..225950823	NUP133	233249_1	0.034	8.056	0.015	8.056
1	225965897	225966425	1:225965897..225966425	ABCB10	120173_1	0.045	7.647	-0.046	7.647
1	225965897	225966425	1:225965897..225966425	ABCB10	193990_1	-0.076	7.787	0.086	7.787
1	226710782	226710964	1:226710782..226710964		745493_1	0.277	8.182	0.081	8.182
1	226756972	226759184	1:226756972..226759184		33182_1	0.065	7.306	-0.038	7.306
1	226764127	226765723	1:226764127..226765723	PGBD5	179539_1	0.674	8.646	0.093	8.646
1	227103563	227104023	1:227103563..227104023	COG2	229970_1	-0.039	7.779	-0.087	7.779
1	227103563	227104023	1:227103563..227104023	COG2	2291697_1	0.513	11.509	0.388	11.509
1	227145019	227156602	1:227145019..227156602	AGT	124014_1	0.102	10.077	0.401	10.077
1	227279602	227280080	1:227279602..227280080	FLJ14525	41979_1	0.256	9.672	0.403	9.672
1	227437444	227438317	1:227437444..227438317	ARV1	201335_1	-0.154	9.687	0.181	9.687
1	227710781	227711105	1:227710781..227711105	GNPAT	760147_1	0.052	11.772	0.362	11.772
1	227710781	227711105	1:227710781..227711105	GNPAT	344564_1	0.021	7.323	-0.009	7.323
1	227821239	227821654	1:227821239..227821654	EGLN1	32144_2	-0.979	10.556	-0.79	10.556
1	227821239	227821654	1:227821239..227821654	EGLN1	32144_3	-0.14	8.04	-0.199	8.04
1	227821239	227821654	1:227821239..227821654	EGLN1	32144_4	-0.892	10.795	-0.707	10.795
1	227821239	227821654	1:227821239..227821654	EGLN1	32144_1	-1.066	10.897	-0.733	10.897
1	227976600	228009005	1:227976600..228009005	TSNAX	740027_1	-0.279	8.228	-0.052	8.228
1	228033262	228034297	1:228033262..228034297		153534_1	-0.063	8.401	0.237	8.401
1	228409939	228410389	1:228409939..228410389	DISC1	27863_1	0.117	7.7	0.05	7.7
1	228409939	228410389	1:228409939..228410389	DISC1	26910_1	0.171	7.929	0.27	7.929
1	228896236	228896611	1:228896236..228896611	SIPA1L2	471744_1	0.179	9.835	-0.414	9.835
1	228896236	228896611	1:228896236..228896611	SIPA1L2	113318_1	-0.17	7.796	-0.074	7.796
1	228896236	228896611	1:228896236..228896611	SIPA1L2	35625_1	0.523	8.342	-0.08	8.342
1	229404383	229421132	1:229404383..229421132	MGC13186	112521_1	0.047	10.922	0.027	10.922
1	229653825	229654117	1:229653825..229654117	PCNXL2	1520716_1	0.059	8.049	-0.13	8.049
1	229653825	229654117	1:229653825..229654117	PCNXL2	50012_1	0.092	8.614	0.01	8.614
1	230092869	230093294	1:230092869..230093294	KCNK1	22468_1	1.895	10.671	1.763	10.671
1	230347413	230766997	1:230347413..230766997	SLC35F3	1639114_1	0.016	7.588	0.046	7.588
1	230347413	230766997	1:230347413..230766997	SLC35F3	322721_1	0.718	8.533	0.324	8.533
1	230824048	230824579	1:230824048..230824579	C1orf31	122420_1	0.245	8.089	0.145	8.089
1	230920172	230920472	1:230920172..230920472	TARBP1	44821_1	-0.498	10.156	-1.35	10.156
1	230970371	230974260	1:230970371..230974260		282992_1	0.128	7.517	0.001	7.517
1	231046749	231050300	1:231046749..231050300	IRF2BP2	127831_1	0.589	11.462	-0.476	11.462
1	231060281	231060829	1:231060281..231060829		1964305_1	0.177	11.569	0.253	11.569
1	231075487	231077261	1:231075487..231077261		2402725_1	0.027	7.728	-0.12	7.728
1	231817925	231833525	1:231817925..231833525	GGPS1	42865_1	-0.031	11.19	1.028	11.19
1	232157066	232160420	1:232157066..232160420	LYST	1660458_1	-0.765	12.796	-0.463	12.796
1	232157066	232160420	1:232157066..232160420	LYST	194123_1	-0.072	9.458	-0.255	9.458
1	232207545	232207760	1:232207545..232207760	PIM2	46959_1	-1.738	8.807	-1.179	8.807
1	232465170	232554432	1:232465170..232554432	NID	1677204_1	-0.085	7.335	0.009	7.335
1	232635330	232635738	1:232635330..232635738	TM7SF1	43770_1	0.687	8.759	-0.074	8.759
1	232884756	232974049	1:232884756..232974049	EDARADD	1738135_1	-0.203	8.217	0.798	8.217
1	233012779	233039037	1:233012779..233039037	LGALS8	199403_1	0.275	8.079	0.199	8.079
1	233024870	233025210	1:233024870..233025210	FLJ10359	771032_1	1.668	10.414	0.713	10.414
1	233215953	233216512	1:233215953..233216512	ACTN2	342129_1	-1.333	8.333	-1.049	8.333
1	233215953	233216512	1:233215953..233216512	ACTN2	35219_1	-0.127	7.668	-0.026	7.668
1	233359258	233359895	1:233359258..233359895	MTR	273124_1	-1.034	10.69	-0.277	10.69
1	233359258	233359895	1:233359258..233359895	MTR	195520_1	0.206	7.759	0.017	7.759
1	233539603	233540059	1:233539603..233540059	RYR2	34006_1	-0.261	7.792	-0.255	7.792
1	233539603	233540059	1:233539603..233540059	RYR2	172053_1	0.006	7.823	-0.012	7.823
1	234969724	234970997	1:234969724..234970997	LOC339535	2463204_1	-0.438	10.325	-0.832	10.325
1	236198085	236198717	1:236198085..236198717		38691_1	-0.036	7.405	0.007	7.405
1	236396635	236398756	1:236396635..236398756	CHRM3	51276_1	-0.381	8.018	-0.247	8.018
1	236401003	236404785	1:236401003..236404785		40842_1	0.532	12.374	0.738	12.374
1	236581021	236964528	1:236581021..236964528	FMN2	156551_1	-0.125	8.087	-0.135	8.087
1	236581021	236964528	1:236581021..236964528	FMN2	320788_1	0.066	8.233	0.287	8.233
1	237228695	237229192	1:237228695..237229192		1733528_1	0.296	7.7	0.018	7.7
1	237677879	237678439	1:237677879..237678439	RGS7	51746_1	1.7	8.995	0.062	8.995
1	237991132	237991719	1:237991132..237991719	FH	469412_1	-0.266	13.33	0.632	13.33
1	238021747	238084984	1:238021747..238084984	KMO	142272_1	-0.593	9.899	0.649	9.899
1	238118195	238120765	1:238118195..238120765	CHML	195911_1	-0.576	8.405	-0.013	8.405
1	239707928	239708558	1:239707928..239708558	KAB	222201_1	-0.592	10.201	-0.644	10.201
1	240133581	240134321	1:240133581..240134321	AKT3	41818_1	-0.849	9.839	-0.842	9.839
1	240133581	240134321	1:240133581..240134321	AKT3	272858_1	0.039	7.728	-0.002	7.728
1	240406744	240536660	1:240406744..240536660	LOC339529	1845356_1	-0.019	7.516	-0.046	7.516
1	240540625	240546819	1:240540625..240546819	ZNF238	308011_1	-0.406	9.206	-0.33	9.206
1	240718960	240719644	1:240718960..240719644		1640651_1	0.009	7.63	0.004	7.63
1	241199261	241200000	1:241199261..241200000		67031_1	0.003	7.826	-0.164	7.826
1	241220366	241220929	1:241220366..241220929		726654_1	-0.033	7.566	-0.065	7.566
1	241343000	241353868	1:241343000..241353868	HNRPU	110731_1	-0.062	9.518	0.584	9.518
1	241343000	241353868	1:241343000..241353868	HNRPU	809951_1	-0.233	12.573	0.145	12.573
1	241343000	241353868	1:241343000..241353868	HNRPU	22694_1	0.573	13.224	0.693	13.224
1	241406681	241407589	1:241406681..241407589		136244_1	-0.036	7.442	0.065	7.442
1	241454551	241458397	1:241454551..241458397		1556806_1	-0.029	7.8	-0.159	7.8
1	242196494	242198774	1:242196494..242198774		29349_1	0.027	8.074	1.093	8.074
1	242599122	242603209	1:242599122..242603209		1552093_1	-0.158	8.785	-0.373	8.785
1	242599122	242603209	1:242599122..242603209		1562356_1	0.032	7.467	0.017	7.467
1	243125985	243126442	1:243125985..243126442	FLJ32001	282400_1	0.209	9.547	-0.223	9.547
1	243224128	243224598	1:243224128..243224598	CGI-49	43411_1	0.189	12.057	-0.37	12.057
1	243397955	243398517	1:243397955..243398517	ELYS	277732_1	0.311	10.984	0.426	10.984
1	243464902	243465642	1:243464902..243465642	SBZF3	756882_1	0.071	7.705	0.093	7.705
1	243524883	243527127	1:243524883..243527127	MGC12466	2403033_1	0.098	8.153	0.03	8.153
1	243589333	243591458	1:243589333..243591458	FLJ12606	1076031_1	-0.256	8.109	-0.044	8.109
1	243611317	243649157	1:243611317..243649157	ZNF124	1642490_1	0.045	7.807	-0.063	7.807
1	243611317	243649157	1:243611317..243649157	ZNF124	1475746_1	0.044	8.008	0.174	8.008
1	243818922	243823902	1:243818922..243823902	ZNF496	66433_1	-0.324	8.625	-0.298	8.625
1	244007205	244009984	1:244007205..244009984	OR2W5	48056_1	0.276	7.775	0.037	7.775
1	244346541	244366917	1:244346541..244366917	TRIM58	141412_1	-0.065	13.844	-0.459	13.844
1	244346541	244366917	1:244346541..244366917	TRIM58	113481_1	-0.463	11.441	-0.627	11.441
1	244384929	244385874	1:244384929..244385874	OR2W3	244354_1	-0.131	8.821	-0.098	8.821
1	244944533	244945053	1:244944533..244945053		1626115_1	0.039	7.489	0.004	7.489
1	245353028	245353467	1:245353028..245353467	FLJ22301	810800_1	-0.196	9.173	0.242	9.173
1	245353958	245355713	1:245353958..245355713	FLJ20531	132901_1	-0.227	8.84	0.129	8.84
1	245410204	245423385	1:245410204..245423385	PGBD2	1667999_1	-0.049	7.784	0.087	7.784
2	245886	246377	2:245886..246377	SH3YL1	108422_1	0.304	11.265	1.536	11.265
2	272040	272827	2:272040..272827	LOC285016	1836956_1	0.045	7.743	0.016	7.743
2	480946	482644	2:480946..482644		1868236_1	0.052	7.472	0.016	7.472
2	738827	739423	2:738827..739423		752760_1	0.047	7.643	0.017	7.643
2	876712	877216	2:876712..877216		41913_1	-0.052	7.447	-0.022	7.447
2	885903	891137	2:885903..891137		744373_1	-0.049	7.732	-0.083	7.732
2	935319	935545	2:935319..935545		2399905_1	-0.87	8.138	-0.691	8.138
2	1143316	1143841	2:1143316..1143841	SNTG2	1565090_1	-0.13	8.686	-0.29	8.686
2	1621214	1621922	2:1621214..1621922	D2S448	127740_1	-2.945	9.795	-0.927	9.795
2	1763189	2305323	2:1763189..2305323	MYT1L	41004_1	0.033	10.791	-0.225	10.791
2	3072942	3086831	2:3072942..3086831	RNASEH1	230243_1	0.224	10.155	-0.06	10.155
2	3136005	3184784	2:3136005..3184784	COLEC11	159202_1	0.549	9.222	0.482	9.222
2	3498613	3501515	2:3498613..3501515		1643681_1	-0.012	7.651	0.044	7.651
2	4169180	4197174	2:4169180..4197174		1640545_1	-0.022	8.211	0.077	8.211
2	4169180	4197174	2:4169180..4197174		743186_1	-0.141	7.839	-0.107	7.839
2	4840394	4843519	2:4840394..4843519	TSSC1	757162_1	0.036	9.993	0.298	9.993
2	5040322	5059798	2:5040322..5059798	MTCBP-1	137188_1	-0.71	10.819	-0.51	10.819
2	5783396	5792115	2:5783396..5792115	SOX11	34609_1	-0.138	7.55	0.002	7.55
2	6707931	6708311	2:6707931..6708311		1737398_1	-0.086	7.713	0.035	7.713
2	6739836	6741174	2:6739836..6741174		743517_1	0.111	7.706	0.079	7.706
2	6821378	6861040	2:6821378..6861040	FLJ42418	1564174_1	0.032	7.551	0.065	7.551
2	6939048	6956347	2:6939048..6956347	LOC129607	207838_1	-0.023	8.218	-0.067	8.218
2	6968505	6988053	2:6968505..6988053	RSAD2	120600_1	-0.05	7.794	-0.053	7.794
2	7118123	7118642	2:7118123..7118642	RNF144	1656118_1	-0.2	7.805	-0.13	7.805
2	7118123	7118642	2:7118123..7118642	RNF144	33573_1	-1.029	9.701	-1.517	9.701
2	7511993	7540977	2:7511993..7540977		726523_1	0.184	7.791	0.106	7.791
2	8404217	8404996	2:8404217..8404996	LOC339789	124788_1	-0.189	7.776	-0.02	7.776
2	8774718	8775181	2:8774718..8775181	ID2	1743966_1	1.313	10.516	0.911	10.516
2	8774718	8775181	2:8774718..8775181	ID2	240151_1	-0.387	9.551	-0.24	9.551
2	8811861	8813414	2:8811861..8813414	LOC285147	22787_1	0.627	8.27	0.358	8.27
2	8819657	8928328	2:8819657..8928328	KIDINS220	143175_1	0.322	8.979	0.061	8.979
2	8819657	8928328	2:8819657..8928328	KIDINS220	143549_1	0.423	11.171	0.236	11.171
2	8819657	8928328	2:8819657..8928328	KIDINS220	731398_1	0.175	7.916	0.106	7.916
2	8952106	8952752	2:8952106..8952752	OACT2	31494_1	1.094	9.503	2.183	9.503
2	8952106	8952752	2:8952106..8952752	OACT2	342125_1	1.03	11.073	2.16	11.073
2	8952106	8952752	2:8952106..8952752	OACT2	193545_1	-0.011	7.666	0.027	7.666
2	9296111	9297171	2:9296111..9297171		1641603_1	0.08	7.53	0.031	7.53
2	9503726	9504123	2:9503726..9504123	ITGB1BP1	34161_1	0.023	10.54	0.271	10.54
2	9560929	9561449	2:9560929..9561449	CPSF3	485940_1	-0.755	9.322	-0.744	9.322
2	9580010	9646496	2:9580010..9646496	ADAM17	182177_1	0.067	9.158	-0.113	9.158
2	9674703	9721704	2:9674703..9721704	YWHAQ	29982_1	0.442	14.201	0.859	14.201
2	10027663	10029918	2:10027663..10029918	TAF1B	135338_1	0.263	9.446	-0.022	9.446
2	10027663	10029918	2:10027663..10029918	TAF1B	746128_1	0.34	8.485	0.608	8.485
2	10042419	10057147	2:10042419..10057147	TFCP2L2	195784_1	-0.029	9.722	-0.419	9.722
2	10213463	10222143	2:10213463..10222143	RRM2	417504_1	0.011	12.699	1.555	12.699
2	10442911	10446133	2:10442911..10446133	HPCAL1	42724_1	-0.588	9.476	-0.371	9.476
2	10533003	10533453	2:10533003..10533453	ODC1	300251_1	0.08	8.801	-0.237	8.801
2	10712874	10713623	2:10712874..10713623	FLJ14075	211925_1	-0.272	10.747	0.132	10.747
2	10874581	10877845	2:10874581..10877845	ATP6V1C2	123627_1	0.133	8.954	-0.328	8.954
2	11002660	11004949	2:11002660..11004949	KCNF1	35344_1	-0.023	9.963	0.516	9.963
2	11246137	11269598	2:11246137..11269598	C2orf22	124569_1	0.417	10.212	0.506	10.212
2	11272375	11435309	2:11272375..11435309	ROCK2	21560_1	-0.852	10.026	-0.195	10.026
2	11536013	11556895	2:11536013..11556895	E2F6	1926446_1	0.364	10.143	0.825	10.143
2	11748902	11761023	2:11748902..11761023	NTSR2	1639221_1	0.113	7.576	-0.001	7.576
2	11867381	11868101	2:11867381..11868101	LPIN1	795782_1	-0.019	7.685	-0.101	7.685
2	11867381	11868101	2:11867381..11868101	LPIN1	277883_1	-0.248	11.145	-0.451	11.145
2	12825918	12826406	2:12825918..12826406	TRIB2	32292_1	-2.884	9.325	-1.949	9.325
2	14723453	14727045	2:14723453..14727045	NSE1	173939_1	3.833	10.26	1.543	10.26
2	14723453	14727045	2:14723453..14727045	NSE1	346612_1	1.914	8.544	0.451	8.544
2	15397499	15398082	2:15397499..15398082	NAG	212889_1	-0.221	7.794	0.103	7.794
2	15397499	15398082	2:15397499..15398082	NAG	2441746_1	0.572	10.934	0.291	10.934
2	15397499	15398082	2:15397499..15398082	NAG	2438426_1	0.35	11.257	0.326	11.257
2	15682367	15721823	2:15682367..15721823	DDX1	773192_1	-0.056	11.627	-0.058	11.627
2	16011050	16011363	2:16011050..16011363		241343_1	0	7.483	-0.036	7.483
2	16032643	16037724	2:16032643..16037724	MYCN	41565_1	-0.852	8.349	-0.745	8.349
2	16717138	16717432	2:16717138..16717432	FAM49A	2373514_1	-0.134	8.047	-0.2	8.047
2	16717138	16717432	2:16717138..16717432	FAM49A	28465_1	1.367	8.342	1.122	8.342
2	17642020	17758407	2:17642020..17758407	VSNL1	210575_1	-0.333	7.894	-0.189	7.894
2	17642020	17758407	2:17642020..17758407	VSNL1	42125_1	-0.316	7.716	-0.336	7.716
2	17981572	18035853	2:17981572..18035853	KCNS3	364997_1	0.676	9.403	0.941	9.403
2	18657618	18659543	2:18657618..18659543	RDH14	137904_1	0.864	11.976	0.654	11.976
2	18665765	18692463	2:18665765..18692463	NT5C1B	1643802_1	-0.081	7.833	0.041	7.833
2	19386579	19387047	2:19386579..19387047		1625917_1	-0.01	7.648	0.033	7.648
2	19473400	19478311	2:19473400..19478311	OSR1	364686_1	0.306	11.938	0.126	11.938
2	20018138	20023055	2:20018138..20023055	LOC130502	128812_1	0.276	8.47	-0.163	8.47
2	20076649	20077326	2:20076649..20077326	WDR35	1646220_1	-0.025	7.717	-0.125	7.717
2	20076649	20077326	2:20076649..20077326	WDR35	287634_1	1.08	9.79	0.453	9.79
2	20125687	20126184	2:20125687..20126184	MATN3	796670_1	-0.35	10.881	-0.42	10.881
2	20125687	20126184	2:20125687..20126184	MATN3	31869_1	0.376	9.198	0.245	9.198
2	20436783	20437233	2:20436783..20437233	PUM2	31883_1	0.275	11.886	0.345	11.886
2	20568528	20569068	2:20568528..20569068	RHOB	277305_1	-0.022	7.258	0.001	7.258
2	20756118	20756823	2:20756118..20756823	FLJ14249	287605_1	-0.144	9.649	-0.054	9.649
2	20799196	20800625	2:20799196..20800625		126262_1	-0.188	7.618	-0.225	7.618
2	21134489	21135412	2:21134489..21135412		210323_1	-0.261	7.843	-0.213	7.843
2	21171903	21172418	2:21171903..21172418	APOB	242062_1	-0.497	8.022	-0.296	8.022
2	21171903	21172418	2:21171903..21172418	APOB	197102_1	0.049	7.541	-0.008	7.541
2	23819934	23820894	2:23819934..23820894	KBTBD9	4543235_1	-0.287	9.828	-0.542	9.828
2	23819934	23820894	2:23819934..23820894	KBTBD9	2390218_1	-0.267	8.178	0.002	8.178
2	24034759	24035466	2:24034759..24035466	KIAA1240	211351_1	0.028	7.745	-0.002	7.745
2	24124393	24125030	2:24124393..24125030	UBXD4	146968_1	-0.112	12.901	-0.435	12.901
2	24137562	24139459	2:24137562..24139459		299370_1	-0.138	10.814	-0.485	10.814
2	24144617	24161296	2:24144617..24161296		127193_1	-0.544	8.554	-0.785	8.554
2	24163896	24181874	2:24163896..24181874	FLJ21945	247141_1	-0.26	8.926	-0.178	8.926
2	24197597	24198202	2:24197597..24198202	FKBP1B	277345_1	-0.154	8.289	-0.489	8.289
2	24211955	24219379	2:24211955..24219379	TP53I3	784696_1	1.182	10.604	0.04	10.604
2	24256365	24257888	2:24256365..24257888	PFN4	1753133_1	0.163	7.907	0.195	7.907
2	24378566	24379315	2:24378566..24379315	ITSN2	278422_1	0.069	7.988	-0.033	7.988
2	24378566	24379315	2:24378566..24379315	ITSN2	2184643_1	0.448	11.628	0.365	11.628
2	24378566	24379315	2:24378566..24379315	ITSN2	23554_1	0.299	9.912	0.074	9.912
2	24378566	24379315	2:24378566..24379315	ITSN2	740537_1	0.089	7.903	-0.039	7.903
2	24378566	24379315	2:24378566..24379315	ITSN2	210939_1	0.142	8.359	-0.03	8.359
2	24378566	24379315	2:24378566..24379315	ITSN2	246683_1	0.144	9.883	-0.285	9.883
2	24721294	24721609	2:24721294..24721609		177286_1	-0.003	7.891	-0.002	7.891
2	24899708	24901054	2:24899708..24901054	NCOA1	839552_1	-1.249	8.022	-0.988	8.022
2	25078155	25106475	2:25078155..25106475	RBJ	121365_1	0.031	7.563	0.034	7.563
2	25078155	25106475	2:25078155..25106475	RBJ	123602_1	0.015	8.004	0.114	8.004
2	25078155	25106475	2:25078155..25106475	RBJ	278119_1	0.005	9.246	0.105	9.246
2	25090554	25091101	2:25090554..25091101		1841680_1	0.119	7.438	0.039	7.438
2	25291713	25293655	2:25291713..25293655		343404_1	0.56	8.732	0.246	8.732
2	25367495	25368060	2:25367495..25368060	DNMT3A	151668_1	0.252	9.801	-0.087	9.801
2	25503655	25505207	2:25503655..25505207		756184_1	0.426	10.035	0.131	10.035
2	25716245	25716628	2:25716245..25716628	DTNB	29483_1	0.215	8.169	0.337	8.169
2	25889082	25889802	2:25889082..25889802	ASXL2	770184_1	0.269	9.751	0.021	9.751
2	26061117	26117017	2:26061117..26117017	KIF3C	23091_1	0.384	8.26	-0.15	8.26
2	26267795	26268250	2:26267795..26268250	RAB10	148985_1	0.573	10.687	0.777	10.687
2	26273683	26274394	2:26273683..26274394		1651078_1	-0.009	8.126	-0.127	8.126
2	26443065	26443764	2:26443065..26443764	GPR113	814502_2	0.315	9.696	0.181	9.696
2	26443065	26443764	2:26443065..26443764	GPR113	730378_1	0.19	10.521	-0.401	10.521
2	26443065	26443764	2:26443065..26443764	GPR113	814502_1	0.488	9.84	0.072	9.84
2	26587161	26590350	2:26587161..26590350	MGC16372	1753600_1	0.01	7.646	0.086	7.646
2	26591721	26693217	2:26591721..26693217	OTOF	38517_1	-0.064	8.005	0.305	8.005
2	26864938	26867649	2:26864938..26867649	KCNK3	148650_1	0.362	7.738	0.053	7.738
2	26864938	26867649	2:26864938..26867649	KCNK3	133076_1	0.206	8.114	-0.057	8.114
2	26920599	26927353	2:26920599..26927353	CENPA	742816_4	0.208	8.224	-0.048	8.224
2	26920599	26927353	2:26920599..26927353	CENPA	742816_2	0.001	7.606	0.007	7.606
2	26920599	26927353	2:26920599..26927353	CENPA	742816_3	0.004	7.545	0.116	7.545
2	26920599	26927353	2:26920599..26927353	CENPA	742816_1	0.009	7.593	0.028	7.593
2	26931392	26932070	2:26931392..26932070		196726_1	-0.257	9.974	0.004	9.974
2	27059444	27084468	2:27059444..27084468	DPYSL5	24701_1	0.059	9.266	0.021	9.266
2	27159979	27160844	2:27159979..27160844	MAPRE3	362910_1	-0.016	8.644	0.018	8.644
2	27196946	27197426	2:27196946..27197426	FLJ21839	1839453_1	-0.226	8.335	-0.04	8.335
2	27235119	27253622	2:27235119..27253622	CGREF1	48940_1	0.03	8.51	0.552	8.51
2	27270982	27273929	2:27270982..27273929	MGC44505	1736332_1	-0.032	8.463	-0.294	8.463
2	27334107	27346666	2:27334107..27346666	SLC5A6	199652_1	-0.1	7.866	0.016	7.866
2	27334107	27346666	2:27334107..27346666	SLC5A6	135018_1	-0.044	9.83	0.365	9.83
2	27351908	27378305	2:27351908..27378305	CAD	726205_1	0.285	10.74	0.252	10.74
2	27445591	27447905	2:27445591..27447905	MPV17	154707_1	-0.399	8.065	0.039	8.065
2	27460843	27491010	2:27460843..27491010	GTF3C2	320262_1	-0.128	10.445	0.682	10.445
2	27505039	27511645	2:27505039..27511645	SNX17	49322_1	0.113	9.823	0.851	9.823
2	27515711	27544147	2:27515711..27544147	PPM1G	39921_1	-0.32	10.755	0.072	10.755
2	27578890	27624222	2:27578890..27624222	SLB	1574693_1	0.02	11.285	0.577	11.285
2	27631356	27658202	2:27631356..27658202	GCKR	126617_1	0.04	7.851	0.02	7.851
2	27714179	27717234	2:27714179..27717234	C2orf16	1640798_1	0.051	7.561	0.065	7.561
2	27785329	27798158	2:27785329..27798158	STAF65(gamma)	49017_1	-0.237	13.408	-0.55	13.408
2	28410068	28410528	2:28410068..28410528	BRE	306058_1	-0.26	9.225	-0.498	9.225
2	28410068	28410528	2:28410068..28410528	BRE	2391815_1	-0.22	8.443	-0.005	8.443
2	28410068	28410528	2:28410068..28410528	BRE	140586_1	-0.038	7.713	0.01	7.713
2	28410068	28410528	2:28410068..28410528	BRE	229602_1	-0.219	10.27	0.864	10.27
2	28410068	28410528	2:28410068..28410528	BRE	125666_1	0.244	8.397	-0.02	8.397
2	28896207	28896608	2:28896207..28896608	PPP1CB	270577_1	-0.004	8.319	-0.149	8.319
2	28991801	28992138	2:28991801..28992138	FLJ20628	731491_1	0.079	11.988	-0.082	11.988
2	29005024	29005452	2:29005024..29005452	WDR43	2261176_1	0.481	9.396	0.326	9.396
2	29005024	29005452	2:29005024..29005452	WDR43	1601988_1	0.199	7.966	0.026	7.966
2	29087003	29087765	2:29087003..29087765		49554_1	0.431	7.74	0.242	7.74
2	29283806	29284247	2:29283806..29284247	RSNL2	795437_1	-0.121	8.009	-0.217	8.009
2	29283806	29284247	2:29283806..29284247	RSNL2	131563_1	1.627	9.26	-0.59	9.26
2	30020649	30021145	2:30020649..30021145	ALK	782538_1	-0.042	8.681	-0.163	8.681
2	30122743	30123300	2:30122743..30123300		727257_1	0.018	7.886	0.149	7.886
2	30293534	30295049	2:30293534..30295049	YPEL5	24500_1	0.661	10.664	0.438	10.664
2	30293534	30295049	2:30293534..30295049	YPEL5	2388689_1	0.075	7.629	-0.042	7.629
2	30717519	30718363	2:30717519..30718363	LYCAT	129756_1	0.622	10.894	0.2	10.894
2	30717519	30718363	2:30717519..30718363	LYCAT	140918_1	0.049	7.738	0.013	7.738
2	31179546	31179862	2:31179546..31179862	GALNT14	124006_1	-0.214	7.966	-0.206	7.966
2	31368853	31402911	2:31368853..31402911	EHD3	130892_1	0.025	8.374	0.132	8.374
2	31470144	31549264	2:31470144..31549264	XDH	127709_1	0.066	7.811	0.008	7.811
2	31659208	31659772	2:31659208..31659772		2275768_1	0.541	10.6	0.303	10.6
2	31661306	31717691	2:31661306..31717691	SRD5A2	2449580_1	0.273	7.796	0.154	7.796
2	31992268	31993007	2:31992268..31993007		1987197_1	0.449	10.963	0.513	10.963
2	31992268	31993007	2:31992268..31993007		814869_1	-0.151	8.048	0.104	8.048
2	32095550	32095993	2:32095550..32095993	C2orf4	25896_2	0.046	8.743	-0.159	8.743
2	32095550	32095993	2:32095550..32095993	C2orf4	232587_1	-0.196	11.122	0.25	11.122
2	32095550	32095993	2:32095550..32095993	C2orf4	25896_1	0.279	9.612	0.027	9.612
2	32168970	32169575	2:32168970..32169575	LOC84661	269024_1	0.641	11.401	0.273	11.401
2	32218506	32218624	2:32218506..32218624	SPG4	281491_1	0.493	8.041	0.043	8.041
2	32361175	32402574	2:32361175..32402574	CARD12	42729_1	0.275	9.683	0.095	9.683
2	32643994	32644477	2:32643994..32644477	BIRC6	129335_1	0.136	10.07	0.102	10.07
2	32643994	32644477	2:32643994..32644477	BIRC6	208565_1	0.022	7.708	0.005	7.708
2	32643994	32644477	2:32643994..32644477	BIRC6	122969_1	-0.083	9.447	-0.2	9.447
2	32643994	32644477	2:32643994..32644477	BIRC6	1234771_1	-0.265	8.057	-0.147	8.057
2	32906130	32906556	2:32906130..32906556	FLJ20272	46132_1	2.044	10.79	0.226	10.79
2	33459240	33459935	2:33459240..33459935	LTBP1	309206_1	-0.963	11.418	-0.875	11.418
2	33459240	33459935	2:33459240..33459935	LTBP1	296181_1	-0.36	10.47	-0.658	10.47
2	33654014	33654728	2:33654014..33654728	RASGRP3	133082_1	0.118	7.96	0.071	7.96
2	33654014	33654728	2:33654014..33654728	RASGRP3	1736616_1	-0.398	11.51	-0.778	11.51
2	36835598	36953581	2:36835598..36953581	VIT	758777_1	-0.109	8.01	-0.1	8.01
2	36835598	36953581	2:36835598..36953581	VIT	346537_1	0.018	7.615	0.059	7.615
2	37178362	37178805	2:37178362..37178805	KIAA1414	2456836_1	0.151	8.05	0.045	8.05
2	37260431	37261014	2:37260431..37261014	EIF2AK2	323185_1	-0.218	12.557	-0.527	12.557
2	37370456	37387954	2:37370456..37387954	PRO1853	256975_1	-0.278	13.124	-0.644	13.124
2	37483438	37512116	2:37483438..37512116	QPCT	711918_2	-3.294	9.642	-2.645	9.642
2	37483438	37512116	2:37483438..37512116	QPCT	711918_1	-0.464	11.287	-0.701	11.287
2	37483438	37512116	2:37483438..37512116	QPCT	267706_1	-3.199	9.569	-2.381	9.569
2	37809292	37809820	2:37809292..37809820	CDC42EP3	127892_1	-0.052	8.927	-0.522	8.927
2	38206396	38214943	2:38206396..38214943	CYP1B1	268878_1	3.957	12.131	2.958	12.131
2	38447177	38447745	2:38447177..38447745	ARL6IP2	220395_1	0.072	11.284	-0.169	11.284
2	38868891	38869132	2:38868891..38869132	GALM	1869089_1	-0.145	14.038	0.1	14.038
2	38882393	38890102	2:38882393..38890102	SFRS7	202904_1	0.441	9.905	0.286	9.905
2	38991147	38991595	2:38991147..38991595	DHX57	24623_1	-0.355	9.469	-0.027	9.469
2	38991147	38991595	2:38991147..38991595	DHX57	247707_1	-0.273	11.241	-0.48	11.241
2	39100995	39101390	2:39100995..39101390		1868663_1	0.225	7.94	0.173	7.94
2	39100995	39101390	2:39100995..39101390		1736796_1	-0.028	7.406	-0.021	7.406
2	39188856	39189325	2:39188856..39189325	SOS1	136847_1	-0.042	8.08	-0.113	8.08
2	39188856	39189325	2:39188856..39189325	SOS1	343051_1	-0.171	9.549	-0.438	9.549
2	39432465	39432985	2:39432465..39432985	MAP4K3	280757_1	-0.599	11.164	-0.596	11.164
2	39604631	39605477	2:39604631..39605477		141123_1	0.02	8.393	0.08	8.393
2	40539863	40540359	2:40539863..40540359	SLC8A1	1466226_1	-0.217	7.882	-0.097	7.882
2	42016345	42032830	2:42016345..42032830		795407_1	-0.061	7.362	0.019	7.362
2	42194995	42195550	2:42194995..42195550	LOC91461	195104_1	0.143	10.252	-0.36	10.252
2	42462345	42462660	2:42462345..42462660	EML4	1838167_1	-0.288	7.828	-0.175	7.828
2	42462345	42462660	2:42462345..42462660	EML4	1638973_1	-0.119	7.943	-0.297	7.943
2	42488327	42489093	2:42488327..42489093	COX7A2L	46147_1	0.563	12.061	0.625	12.061
2	42633359	42895737	2:42633359..42895737	MTA3	347147_1	-0.408	10.575	-0.001	10.575
2	42910354	42910844	2:42910354..42910844	HAAO	240647_1	0.141	8.056	0.292	8.056
2	43362469	43365027	2:43362469..43365027	ZFP36L2	418172_1	-0.178	11.658	-0.627	11.658
2	43362469	43365027	2:43362469..43365027	ZFP36L2	814576_2	0.259	10.024	0.33	10.024
2	43362469	43365027	2:43362469..43365027	ZFP36L2	814576_3	0.287	9.896	0.433	9.896
2	43362469	43365027	2:43362469..43365027	ZFP36L2	814576_4	0.302	10.107	0.431	10.107
2	43362469	43365027	2:43362469..43365027	ZFP36L2	814576_1	-0.179	8.941	0.26	8.941
2	43366130	43367645	2:43366130..43367645	MGC40574	1184326_1	-0.01	7.486	0.012	7.486
2	43395410	43395940	2:43395410..43395940	THADA	209726_1	0.075	7.757	0.086	7.757
2	43813942	43814439	2:43813942..43814439	PLEKHH2	728054_1	-0.095	8.715	-0.199	8.715
2	43946584	43947054	2:43946584..43947054	D2LIC	780940_1	0.816	10.13	0.716	10.13
2	43946584	43947054	2:43946584..43947054	D2LIC	127124_1	0.036	9.239	-0.3	9.239
2	43951261	43977609	2:43951261..43977609	ABCG5	121977_1	-0.04	8.069	-0.02	8.069
2	43977753	44017256	2:43977753..44017256	ABCG8	111915_1	0.623	8.428	0.177	8.428
2	44038989	44039431	2:44038989..44039431	LRPPRC	23756_1	0.071	12.423	0.3	12.423
2	44456330	44456899	2:44456330..44456899	SLC3A1	813491_1	0.191	10.777	0.574	10.777
2	44456330	44456899	2:44456330..44456899	SLC3A1	1501691_1	-0.179	8.146	-0.063	8.146
2	44571141	44571615	2:44571141..44571615	FLJ23451	1188606_1	0.147	7.939	0.077	7.939
2	44571141	44571615	2:44571141..44571615	FLJ23451	207758_1	0.006	7.807	-0.016	7.807
2	45069910	45070441	2:45069910..45070441		1637121_1	-0.074	7.523	0.062	7.523
2	45330968	45462085	2:45330968..45462085	UNQ6975	1892310_1	1.967	9.466	0.315	9.466
2	45527470	45750054	2:45527470..45750054	FLJ10379	418178_1	-0.604	9.417	-0.219	9.417
2	46308129	46308900	2:46308129..46308900	PRKCE	815151_1	0.91	9.087	0.291	9.087
2	46308129	46308900	2:46308129..46308900	PRKCE	1984504_1	0.021	7.626	0.103	7.626
2	46502244	46502853	2:46502244..46502853	EPAS1	1237798_1	0.135	7.507	-0.099	7.507
2	46502244	46502853	2:46502244..46502853	EPAS1	206046_1	-0.127	8.491	-0.127	8.491
2	46502244	46502853	2:46502244..46502853	EPAS1	131979_1	-0.25	10.945	-1.961	10.945
2	46704915	46705263	2:46704915..46705263	PIGF	550353_1	0.265	9.254	0.057	9.254
2	46704915	46705263	2:46704915..46705263	PIGF	234460_1	-0.295	11.109	-0.546	11.109
2	46704915	46705263	2:46704915..46705263	PIGF	273392_1	0.049	11.352	0.085	11.352
2	46766886	46768557	2:46766886..46768557		1638965_1	0.124	8.343	-0.091	8.343
2	46785221	46787960	2:46785221..46787960		121209_1	0.191	8.395	0.144	8.395
2	46887895	46888055	2:46887895..46888055	SOCS5	247794_1	0.018	10.191	-0.016	10.191
2	46984665	46997796	2:46984665..46997796		345353_1	-0.073	7.679	0.001	7.679
2	46984665	46997796	2:46984665..46997796		258698_1	0.036	7.491	0.086	7.491
2	47040663	47054593	2:47040663..47054593	MCFD2	346570_1	-0.468	12.197	-1.211	12.197
2	47120743	47121148	2:47120743..47121148	TTC7A	152892_1	0.173	8.81	-0.069	8.81
2	47120743	47121148	2:47120743..47121148	TTC7A	153650_1	-0.378	8.408	-0.139	8.408
2	47298958	47299155	2:47298958..47299155		214006_1	-0.377	8.748	-0.297	8.748
2	47610010	47610446	2:47610010..47610446	MSH2	32790_1	-0.339	11.065	-0.716	11.065
2	48046093	48046783	2:48046093..48046783		1625231_1	0.319	10.066	0.672	10.066
2	48644544	48644944	2:48644544..48644944	LOC129285	1554435_1	-0.069	7.697	-0.018	7.697
2	48742607	48743422	2:48742607..48743422	LHCGR	1620676_1	0.084	7.728	0.115	7.728
2	50902824	50903316	2:50902824..50903316	NRXN1	1552433_1	0.894	9.326	0.85	9.326
2	52511906	52528801	2:52511906..52528801		731677_1	-0.038	7.684	-0.052	7.684
2	53808768	53925730	2:53808768..53925730	ASB3	182591_1	-0.443	11.095	-0.793	11.095
2	53947985	53953456	2:53947985..53953456	C2orf30	308050_1	-0.54	11.613	-0.125	11.613
2	53947985	53953456	2:53947985..53953456	C2orf30	739129_1	-0.446	11.51	0.097	11.51
2	53988093	53988866	2:53988093..53988866		283615_1	0.375	8.054	0.029	8.054
2	53991700	53998719	2:53991700..53998719	GPR75	53042_1	-0.058	7.944	0.071	7.944
2	54092391	54092888	2:54092391..54092888	PSME4	127169_1	-0.195	10.392	-0.262	10.392
2	54092391	54092888	2:54092391..54092888	PSME4	2447082_1	-0.035	8.002	-0.338	8.002
2	54289620	54289998	2:54289620..54289998	ACYP2	392123_1	-0.728	11.354	0.313	11.354
2	54289620	54289998	2:54289620..54289998	ACYP2	175391_1	0.944	9.666	0.395	9.666
2	54469721	54500365	2:54469721..54500365	FLJ40298	742928_1	0.1	8.334	0.305	8.334
2	54799798	54801580	2:54799798..54801580	SPTBN1	166148_1	0.391	10.623	0.08	10.623
2	55118613	55119402	2:55118613..55119402	RTN4	38934_1	-0.462	12.51	-0.36	12.51
2	55370102	55370452	2:55370102..55370452	FLJ31438	210581_1	0.26	9.509	0.114	9.509
2	55373617	55374395	2:55373617..55374395	RPS27A	877827_1	-0.113	13.406	1.385	13.406
2	55375407	55408015	2:55375407..55408015	MTIF2	46489_1	-0.4	11.518	-0.135	11.518
2	55408363	55408906	2:55408363..55408906		1569878_1	0.168	9.439	0.889	9.439
2	55426870	55473177	2:55426870..55473177	KIAA1212	784096_1	-0.712	9.745	-1.296	9.745
2	55750237	55750832	2:55750237..55750832	KIAA1387	2055121_1	-0.399	8.537	-0.387	8.537
2	55772858	55773127	2:55772858..55773127	PNPT1	284473_1	-0.537	10.583	-0.472	10.583
2	56004747	56061829	2:56004747..56061829	EFEMP1	111647_1	-0.78	8.906	1.419	8.906
2	56332696	56333145	2:56332696..56333145	KIAA1912	289764_1	-0.276	12.335	-0.329	12.335
2	57859588	57864956	2:57859588..57864956		307774_1	-0.039	7.75	-0.169	7.75
2	58276707	58277167	2:58276707..58277167	VRK2	108191_1	0.35	10.599	-0.151	10.599
2	58835499	58835916	2:58835499..58835916		1998573_1	0.465	10.416	0.12	10.416
2	59055271	59202552	2:59055271..59202552		221602_1	-0.011	8.846	-0.337	8.846
2	60667490	60667938	2:60667490..60667938	BCL11A	127779_2	0.351	9.104	0.143	9.104
2	60667490	60667938	2:60667490..60667938	BCL11A	1848461_1	-0.004	7.438	-0.042	7.438
2	60667490	60667938	2:60667490..60667938	BCL11A	127779_1	0.02	7.654	0.038	7.654
2	60667490	60667938	2:60667490..60667938	BCL11A	265431_1	-1.635	8.732	-1.062	8.732
2	60939152	60939968	2:60939152..60939968	PAPOLG	139764_2	-0.131	13.467	-0.419	13.467
2	60939152	60939968	2:60939152..60939968	PAPOLG	139764_1	-0.059	13.555	-0.282	13.555
2	61038228	61038557	2:61038228..61038557	REL	704548_1	0.021	13.665	-0.194	13.665
2	61064694	61066940	2:61064694..61066940		343978_1	-0.011	9.652	0.454	9.652
2	61189942	61190503	2:61189942..61190503		2187832_1	0.65	11.263	0.452	11.263
2	61200786	61201307	2:61200786..61201307		1687550_1	-0.016	10.161	-0.083	10.161
2	61234429	61234786	2:61234429..61234786	KIAA1841	1899235_1	-0.111	8.313	-0.142	8.313
2	61300425	61300843	2:61300425..61300843		1642408_1	0.01	8.121	0.111	8.121
2	61380699	61381461	2:61380699..61381461	USP34	201064_1	0.019	8.384	-0.012	8.384
2	61380699	61381461	2:61380699..61381461	USP34	143486_1	-0.122	10.623	-0.327	10.623
2	61380699	61381461	2:61380699..61381461	USP34	1676159_1	-0.273	8.764	-0.087	8.764
2	61380699	61381461	2:61380699..61381461	USP34	245886_1	-0.153	13.276	-0.1	13.276
2	61380699	61381461	2:61380699..61381461	USP34	201471_1	0.261	10.749	-0.031	10.749
2	61380699	61381461	2:61380699..61381461	USP34	243478_1	-0.401	11.121	-0.729	11.121
2	61543006	61543305	2:61543006..61543305	IQGAP2	124047_1	-0.342	10.05	-0.374	10.05
2	61543006	61543305	2:61543006..61543305	IQGAP2	321386_1	-2.759	9.124	-2.275	9.124
2	61622689	61622916	2:61622689..61622916	XPO1	259364_1	0.183	12.732	0.007	12.732
2	62009984	62010687	2:62009984..62010687	CCT4	295529_1	-0.47	11.079	-0.664	11.079
2	62009984	62010687	2:62009984..62010687	CCT4	31573_1	0.269	13.361	0.186	13.361
2	62334912	62363517	2:62334912..62363517	B3GNT1	143402_1	0.379	10.613	0.752	10.613
2	62639420	62645255	2:62639420..62645255	TMEM17	183110_1	-0.004	7.682	-0.014	7.682
2	63026025	63026374	2:63026025..63026374	EHBP1	127835_1	-0.184	10.906	-0.552	10.906
2	63026025	63026374	2:63026025..63026374	EHBP1	195399_1	0.163	9.062	-0.076	9.062
2	63026025	63026374	2:63026025..63026374	EHBP1	115192_1	-0.076	11.016	-0.236	11.016
2	63026025	63026374	2:63026025..63026374	EHBP1	207448_1	0.024	10.131	-0.421	10.131
2	63260166	63582015	2:63260166..63582015	LOC51057	30671_1	0.606	9.078	0.307	9.078
2	63702959	63727285	2:63702959..63727285	MDH1	246046_1	0.507	12.921	0.11	12.921
2	63702959	63727285	2:63702959..63727285	MDH1	198961_1	-0.38	10.609	-0.56	10.609
2	64029349	64029811	2:64029349..64029811	UGP2	221459_1	0.108	8.074	0.033	8.074
2	64031686	64075506	2:64031686..64075506	VPS54	287772_1	0.566	10.229	0.39	10.229
2	64231645	64251134	2:64231645..64251134	PELI1	130633_1	1.07	9.678	-0.822	9.678
2	64593305	64600166	2:64593305..64600166	HSPC159	365045_1	-0.397	8.927	0.442	8.927
2	64658619	64659016	2:64658619..64659016		760138_1	0.076	7.533	0.033	7.533
2	64703391	64703723	2:64703391..64703723	AFTIPHILIN	4616671_1	-0.083	13.556	1.021	13.556
2	64770406	64792697	2:64770406..64792697	SERTAD2	28555_1	0.555	10.062	0.228	10.062
2	65138283	65162648	2:65138283..65162648	SLC1A4	233144_1	1.027	9.99	1.365	9.99
2	65195145	65225788	2:65195145..65225788	KIAA0582	21721_1	-0.07	8.797	0.077	8.797
2	65195145	65225788	2:65195145..65225788	KIAA0582	127088_1	-0.066	11.971	-0.215	11.971
2	65364432	65366376	2:65364432..65366376	ACTR2	123504_1	-1.687	9.385	-1.462	9.385
2	65541267	65542010	2:65541267..65542010	SPRED2	30385_1	0.612	10.348	-0.032	10.348
2	66037985	66038457	2:66037985..66038457	FLJ16124	1734947_1	0.063	7.592	-0.024	7.592
2	66576811	66577357	2:66576811..66577357	MEIS1	280592_1	0.019	7.885	-0.014	7.885
2	67043218	67110245	2:67043218..67110245		744810_1	1.246	10.829	0.557	10.829
2	67541576	67544118	2:67541576..67544118	ETAA16	135369_1	-0.389	10.043	0.034	10.043
2	67700829	67708882	2:67700829..67708882		1526535_1	0.014	7.481	0.11	7.481
2	67822595	67822993	2:67822595..67822993		2283149_1	0.742	11.9	0.638	11.9
2	68181417	68186004	2:68181417..68186004	LOC219347	287807_1	0.612	8.264	0.642	8.264
2	68287994	68288773	2:68287994..68288773	LOC116143	2141308_1	0.308	9.291	0.257	9.291
2	68287994	68288773	2:68287994..68288773	LOC116143	206595_2	-0.042	7.991	-0.057	7.991
2	68287994	68288773	2:68287994..68288773	LOC116143	206595_1	0.302	10.008	0.109	10.008
2	68317639	68391298	2:68317639..68391298	PPP3R1	2107514_1	-0.229	9.329	-0.256	9.329
2	68505788	68506114	2:68505788..68506114	PLEK	124911_1	-0.267	8.941	-0.384	8.941
2	68606392	68718945	2:68606392..68718945	C2orf13	210622_1	0.053	8.203	0.193	8.203
2	68971687	68975975	2:68971687..68975975		1639203_1	0.156	7.577	0.043	7.577
2	69085088	69089531	2:69085088..69089531	GDDR	1693411_1	0.054	7.686	0.013	7.686
2	69213810	69214142	2:69213810..69214142	ANTXR1	204545_1	-0.285	8.162	-0.519	8.162
2	69521614	69522348	2:69521614..69522348	GFPT1	147257_1	-0.438	10.315	0.474	10.315
2	69521614	69522348	2:69521614..69522348	GFPT1	136006_1	0.876	10.541	1.391	10.541
2	69521614	69522348	2:69521614..69522348	GFPT1	39658_1	0.36	10.957	1.172	10.957
2	69534910	69576276	2:69534910..69576276	HIRIP5	347517_1	-0.118	10.898	-0.383	10.898
2	69669574	69669920	2:69669574..69669920		243524_1	-0.25	10.625	-0.528	10.625
2	69904458	69909890	2:69904458..69909890		199079_1	-0.35	9.092	-0.404	9.092
2	69953569	69964566	2:69953569..69964566	ANXA4	138751_1	-0.606	11.373	0.343	11.373
2	69965432	69965883	2:69965432..69965883		1574120_1	-0.163	8.698	-0.343	8.698
2	69981179	69981694	2:69981179..69981694	GCL	2388615_1	0.691	11.066	-0.814	11.066
2	70032740	70044000	2:70032740..70044000	RY1	299806_1	0.954	10.732	0.478	10.732
2	70032740	70044000	2:70032740..70044000	RY1	714210_1	0.838	10.193	0.289	10.193
2	70063205	70063768	2:70063205..70063768	MAD	257519_1	0.236	10.01	-0.073	10.01
2	70146798	70149352	2:70146798..70149352	LOC400960	211292_1	-0.398	10.846	-0.703	10.846
2	70226349	70227983	2:70226349..70227983	PCBP1	839890_1	0.222	9.528	0.858	9.528
2	70360815	70361366	2:70360815..70361366	TIA1	289358_1	0.219	10.867	-0.356	10.867
2	70360815	70361366	2:70360815..70361366	TIA1	199296_1	-0.169	10.46	-0.63	10.46
2	70360815	70361366	2:70360815..70361366	TIA1	770452_1	0.028	9.402	-0.577	9.402
[truncated: 14,384 more rows]
